# Supplementary material for: Direct linking of Greenland and Antarctic ice cores at the Toba eruption (74 ka BP)
Source: Copernicus journal article supplement (doi:10.5194/cp-9-749-2013), 2013-03-19
Supplement: Supplementary file 1 [file Figure_2_EDML.xls]

## Sheet: Header
Records from the Antarctic EDML ice core at around the Laschamp event
applied in Figure 2 of the paper:
Direct linking of Greenland and Antarctic ice cores at the Toba eruption (74 ka BP)
Svensson et al., Climate of the Past, 2013

## Sheet: DEP
%Depth(m)	DEP(microS/m)
1365.03	13.7652
1365.03	13.6034
1365.04	13.9776
1365.04	13.8986
1365.05	13.7896
1365.05	13.8754
1365.06	14.1853
1365.06	15.0494
1365.07	15.7045
1365.07	15.5453
1365.08	15.0643
1365.08	15.0154
1365.09	15.5271
1365.09	15.9152
1365.1	16.7215
1365.1	17.723
1365.11	17.512
1365.11	17.4337
1365.12	18.6473
1365.12	19.4367
1365.12	19.5632
1365.13	19.3733
1365.13	18.8244
1365.14	18.7413
1365.14	18.8558
1365.15	18.4407
1365.15	18.2011
1365.16	17.5165
1365.16	16.5034
1365.17	16.0031
1365.17	15.3641
1365.18	15.131
1365.18	15.2964
1365.19	15.5322
1365.19	15.9487
1365.2	16.6578
1365.2	17.5823
1365.21	17.8674
1365.21	17.3805
1365.22	16.3971
1365.22	15.5384
1365.23	14.8303
1365.23	14.9621
1365.24	15.7128
1365.24	16.5489
1365.25	17.0816
1365.26	16.7441
1365.26	17.2007
1365.27	17.7601
1365.27	17.4087
1365.28	17.8046
1365.28	17.4012
1365.29	16.5175
1365.29	15.942
1365.3	15.3647
1365.3	15.0068
1365.31	15.1211
1365.31	15.302
1365.32	16.9539
1365.32	17.0953
1365.33	15.5095
1365.33	15.2626
1365.34	15.356
1365.34	15.1479
1365.35	15.0713
1365.35	14.9094
1365.36	15.0105
1365.36	16.0759
1365.37	16.4586
1365.37	14.5407
1365.38	13.6735
1365.38	13.5192
1365.38	13.9752
1365.39	13.9767
1365.39	13.4588
1365.4	14.3558
1365.4	15.5049
1365.41	15.1242
1365.41	14.0488
1365.42	12.8998
1365.42	12.604
1365.43	13.3625
1365.43	15.2015
1365.44	16.4717
1365.44	15.7355
1365.45	15.1017
1365.45	15.6088
1365.46	15.6969
1365.46	15.1637
1365.47	15.0469
1365.47	15.2183
1365.48	15.3544
1365.48	15.1112
1365.49	15.6311
1365.49	16.5126
1365.5	16.9371
1365.51	17.6105
1365.51	17.5387
1365.52	16.7359
1365.52	16.4399
1365.53	16.0304
1365.53	15.3718
1365.58	16.0593
1365.59	16.7758
1365.59	15.0666
1365.6	13.4405
1365.6	13.3619
1365.61	14.8459
1365.61	15.9654
1365.62	15.8218
1365.62	15.3128
1365.62	15.5955
1365.63	16.022
1365.63	15.472
1365.64	14.7938
1365.64	14.5823
1365.65	14.3829
1365.65	14.7793
1365.66	15.1614
1365.66	14.3186
1365.67	13.8393
1365.67	14.2401
1365.68	13.7705
1365.68	13.5093
1365.69	13.6921
1365.69	13.4525
1365.7	13.3715
1365.7	13.7303
1365.71	14.7445
1365.71	16.052
1365.72	15.8159
1365.72	15.0509
1365.73	14.6165
1365.73	14.5535
1365.74	14.9067
1365.74	15.127
1365.75	15.1258
1365.76	15.2693
1365.76	15.8501
1365.77	16.1077
1365.77	15.5609
1365.78	14.9839
1365.78	14.688
1365.79	14.5879
1365.79	14.5709
1365.8	14.7554
1365.8	15.0541
1365.81	14.8575
1365.81	14.5757
1365.82	14.3564
1365.82	14.0128
1365.83	13.8872
1365.83	13.6883
1365.84	13.4193
1365.84	13.3202
1365.85	13.2551
1365.85	13.0706
1365.86	13.2641
1365.86	13.564
1365.87	14.3209
1365.87	14.6743
1365.88	15.0276
1365.88	15.6327
1365.88	15.3613
1365.89	14.5101
1365.89	13.7667
1365.9	14.136
1365.9	15.0837
1365.91	15.2433
1365.91	14.8451
1365.92	15.6369
1365.92	16.9706
1365.93	17.0124
1365.93	15.675
1365.94	15.2728
1365.94	16.2374
1365.95	16.7949
1365.95	15.9376
1365.96	14.2653
1365.96	13.6638
1365.97	14.4144
1365.97	15.0228
1366.02	14.0304
1366.03	13.736
1366.03	13.6812
1366.04	13.9076
1366.04	13.9285
1366.05	14.3506
1366.05	15.059
1366.06	14.6498
1366.06	14.4558
1366.07	15.776
1366.07	17.436
1366.08	17.1543
1366.08	15.6857
1366.09	14.2324
1366.09	13.5883
1366.1	14.1321
1366.1	13.9153
1366.11	12.8214
1366.11	13.1972
1366.12	14.5422
1366.12	15.4986
1366.12	15.9386
1366.13	15.3877
1366.13	14.383
1366.14	13.7821
1366.14	13.4829
1366.15	14.19
1366.15	14.7705
1366.16	15.2972
1366.16	15.9238
1366.17	15.2403
1366.17	14.5003
1366.18	14.6893
1366.18	14.7493
1366.19	14.829
1366.19	14.9874
1366.2	15.2245
1366.2	15.7962
1366.21	15.8955
1366.21	15.8
1366.22	15.6347
1366.22	15.3695
1366.23	15.3385
1366.23	15.5784
1366.24	15.9526
1366.24	16.0255
1366.25	15.2832
1366.26	14.8012
1366.26	15.6259
1366.27	16.3129
1366.27	16.9054
1366.28	16.9326
1366.28	15.9636
1366.29	15.1858
1366.29	14.9813
1366.3	15.0501
1366.3	15.1576
1366.31	15.0143
1366.31	14.9362
1366.32	15.6907
1366.32	16.9499
1366.33	16.5072
1366.33	15.0544
1366.34	14.3377
1366.34	14.2041
1366.35	14.2705
1366.35	14.7686
1366.36	14.7929
1366.36	13.9744
1366.37	13.5835
1366.37	13.655
1366.38	14.0236
1366.38	14.7033
1366.38	14.9347
1366.39	15.3868
1366.39	16.1971
1366.4	15.8264
1366.4	14.2315
1366.41	13.1827
1366.41	13.3102
1366.42	14.0284
1366.42	14.8665
1366.43	15.7336
1366.43	16.4663
1366.44	17.0071
1366.44	17.3458
1366.45	17.3479
1366.45	16.4864
1366.46	15.7491
1366.46	15.104
1366.47	14.6731
1366.47	14.4858
1366.48	14.2094
1366.48	14.2749
1366.49	14.9242
1366.49	16.4601
1366.5	18.4146
1366.51	18.8607
1366.51	17.23
1366.52	15.4665
1366.52	15.3081
1366.53	15.0493
1366.53	14.3044
1366.54	13.8153
1366.54	13.5701
1366.55	13.4413
1366.55	13.5743
1366.56	13.6712
1366.56	13.4312
1366.57	13.3064
1366.57	13.5529
1366.58	13.8658
1366.58	14.5539
1366.59	16.2525
1366.59	16.9701
1366.6	15.9632
1366.6	14.872
1366.61	14.6694
1366.61	15.091
1366.62	14.7973
1366.62	14.255
1366.62	13.6045
1366.63	13.2031
1366.63	13.03
1366.64	12.9332
1366.64	12.9286
1366.65	13.1243
1366.65	13.7456
1366.66	14.6199
1366.66	15.0433
1366.67	14.9662
1366.67	14.8398
1366.68	14.5162
1366.68	13.6459
1366.69	13.3781
1366.69	14.4411
1366.7	15.0806
1366.7	14.2203
1366.71	13.1625
1366.71	12.9554
1366.72	13.2665
1366.72	13.3807
1366.73	13.4714
1366.73	13.5834
1366.74	13.6356
1366.74	14.1434
1366.75	14.5934
1366.76	14.1387
1366.76	14.1851
1366.77	14.4528
1366.77	14.2029
1366.78	14.4025
1366.78	14.5663
1366.79	15.5879
1366.79	16.9566
1366.8	16.4334
1366.8	14.8776
1366.81	14.2096
1366.81	14.4391
1366.82	14.9028
1366.82	14.85
1366.83	14.415
1366.83	14.1324
1366.84	14.2423
1366.84	14.7166
1366.85	15.8536
1366.85	17.2162
1366.86	17.3212
1366.86	16.2513
1366.87	16.1114
1366.87	16.6611
1366.88	16.462
1366.88	15.9065
1366.88	16.2219
1366.89	17.1151
1366.89	17.2195
1366.9	16.7462
1366.9	16.4097
1366.91	16.0877
1366.91	15.9957
1366.92	15.8719
1366.92	15.8824
1366.93	15.958
1366.93	16.1739
1366.94	16.2151
1366.94	16.5178
1366.95	18.1689
1366.95	19.7883
1366.96	18.757
1366.96	16.2249
1366.97	15.3848
1366.97	17.0778
1367.02	15.5999
1367.03	16.3419
1367.03	16.2093
1367.04	16.0191
1367.04	16.0737
1367.05	16.042
1367.05	16.0259
1367.06	15.9248
1367.06	16.0516
1367.07	16.5247
1367.07	17.5385
1367.08	17.6673
1367.08	16.7787
1367.09	16.3923
1367.09	16.3078
1367.1	16.2697
1367.1	16.1758
1367.11	15.9772
1367.11	15.7473
1367.12	15.5693
1367.12	15.7884
1367.12	15.7247
1367.13	15.0855
1367.13	14.896
1367.14	15.4856
1367.14	16.138
1367.15	16.1408
1367.15	15.9255
1367.16	16.2433
1367.16	17.0964
1367.17	16.529
1367.17	14.5927
1367.18	13.366
1367.18	13.2161
1367.19	13.8587
1367.19	14.5122
1367.2	14.6271
1367.2	14.9303
1367.21	15.8625
1367.21	16.3546
1367.22	15.9299
1367.22	15.2836
1367.23	15.3529
1367.23	15.5399
1367.24	15.8348
1367.24	16.7575
1367.25	18.1266
1367.26	18.8449
1367.26	18.4548
1367.27	17.6635
1367.27	17.0141
1367.28	16.3067
1367.28	16.6575
1367.29	17.8758
1367.29	17.4929
1367.3	16.2125
1367.3	15.8811
1367.31	15.8982
1367.31	16.0109
1367.32	15.7384
1367.32	14.7761
1367.33	13.9778
1367.33	13.6551
1367.34	13.5029
1367.34	13.7442
1367.35	14.6426
1367.35	15.7905
1367.36	15.5623
1367.36	14.5633
1367.37	13.4124
1367.37	12.3572
1367.38	12.0696
1367.38	11.9655
1367.38	11.9253
1367.39	11.792
1367.39	11.5011
1367.4	11.6046
1367.4	11.6601
1367.41	11.5834
1367.41	11.6456
1367.42	11.7046
1367.42	11.8594
1367.43	12.1988
1367.43	12.3671
1367.44	12.3206
1367.44	12.4112
1367.45	12.4608
1367.45	12.3554
1367.46	12.227
1367.46	12.2764
1367.47	13.1289
1367.47	13.9934
1367.48	13.2814
1367.48	13.1034
1367.49	13.5166
1367.49	13.3488
1367.5	12.9791
1367.51	13.0125
1367.51	13.4758
1367.52	14.8845
1367.52	16.2433
1367.53	16.1849
1367.53	15.8987
1367.54	15.2169
1367.54	14.0956
1367.55	13.8107
1367.55	13.9334
1367.56	14.0425
1367.56	14.9549
1367.57	15.6262
1367.57	15.6582
1367.58	15.3875
1367.58	15.3799
1367.59	16.1559
1367.59	16.3069
1367.6	15.7306
1367.6	15.7034
1367.61	15.8804
1367.61	15.234
1367.62	15.301
1367.62	16.08
1367.62	16.5284
1367.63	15.9829
1367.63	14.9269
1367.64	14.7926
1367.64	15.0297
1367.65	15.6418
1367.65	17.2761
1367.66	18.2465
1367.66	17.4761
1367.67	15.3803
1367.67	14.5162
1367.68	14.978
1367.68	15.5057
1367.69	15.165
1367.69	14.4507
1367.7	14.2804
1367.7	15.074
1367.71	16.7011
1367.71	17.7133
1367.72	16.9671
1367.72	14.9237
1367.73	14.8552
1367.73	14.1829
1367.74	13.5515
1367.74	13.6618
1367.75	13.6232
1367.76	13.4406
1367.76	13.3202
1367.77	13.387
1367.77	13.9344
1367.78	13.6427
1367.78	13.3348
1367.79	13.2821
1367.79	13.3927
1367.8	13.3204
1367.8	12.7865
1367.81	12.4724
1367.81	12.9987
1367.82	13.2378
1367.82	13.8937
1367.83	15.5943
1367.83	16.6855
1367.84	16.3682
1367.84	16.0053
1367.85	15.6952
1367.85	15.1983
1367.86	15.1033
1367.86	14.5592
1367.87	14.3967
1367.87	14.8925
1367.88	15.7556
1367.88	16.3377
1367.88	15.7307
1367.89	14.9609
1367.89	15.705
1367.9	16.7505
1367.9	16.624
1367.91	15.6202
1367.91	14.9753
1367.92	15.1903
1367.92	15.551
1367.93	15.8841
1367.93	15.9531
1367.94	14.4681
1367.94	13.3636
1367.95	13.3672
1367.95	13.6235
1367.96	14.6398
1367.96	14.875
1367.97	14.4059
1367.97	15.3442
1368.02	14.9207
1368.03	14.1586
1368.03	14.7122
1368.04	15.2816
1368.04	15.0496
1368.05	15.7649
1368.05	16.7033
1368.06	16.1311
1368.06	16.7953
1368.07	17.4951
1368.07	16.5596
1368.08	16.207
1368.08	15.7219
1368.09	15.3689
1368.09	15.2773
1368.1	16.1447
1368.1	17.1957
1368.11	17.1248
1368.11	16.1381
1368.12	15.7409
1368.12	15.8636
1368.12	16.4726
1368.13	16.5875
1368.13	16.2053
1368.14	15.9757
1368.14	16.1378
1368.15	15.9871
1368.15	16.4294
1368.16	17.762
1368.16	16.7146
1368.17	14.6682
1368.17	14.248
1368.18	14.335
1368.18	14.4365
1368.19	14.909
1368.19	15.1759
1368.2	15.9841
1368.2	16.912
1368.21	17.0321
1368.21	16.76
1368.22	15.8493
1368.22	15.5729
1368.23	16.7434
1368.23	18.228
1368.24	19.3271
1368.24	20.9811
1368.25	22.3003
1368.26	21.9907
1368.26	20.5109
1368.27	19.2279
1368.27	18.8734
1368.28	19.3261
1368.28	19.2871
1368.29	19.0314
1368.29	19.1135
1368.3	19.1992
1368.3	19.3288
1368.31	19.1828
1368.31	18.5935
1368.32	18.6252
1368.32	18.7553
1368.33	18.2591
1368.33	17.9127
1368.34	17.6835
1368.34	17.7186
1368.35	17.786
1368.35	16.5946
1368.36	15.3898
1368.36	15.001
1368.37	14.762
1368.37	15.0428
1368.38	15.16
1368.38	14.6989
1368.38	14.4346
1368.39	14.3128
1368.39	14.2896
1368.4	14.4072
1368.4	14.308
1368.41	14.4021
1368.41	14.1797
1368.42	13.8559
1368.42	13.7308
1368.43	13.958
1368.43	13.7557
1368.44	12.8886
1368.44	12.4668
1368.45	12.6658
1368.45	13.7866
1368.46	15.2506
1368.46	14.406
1368.47	12.6007
1368.47	12.067
1368.48	11.9335
1368.48	11.9183
1368.49	12.0887
1368.49	12.4188
1368.5	12.9921
1368.51	13.6667
1368.51	15.1982
1368.52	16.425
1368.52	16.325
1368.53	15.5992
1368.53	15.1418
1368.54	15.5674
1368.54	15.4376
1368.55	14.0977
1368.55	12.5859
1368.56	11.6716
1368.56	11.2909
1368.57	11.1518
1368.57	11.0767
1368.58	10.7241
1368.58	10.3214
1368.59	10.1178
1368.59	10.2428
1368.6	10.5053
1368.6	10.7765
1368.61	11.3328
1368.61	11.4707
1368.62	11.2095
1368.62	11.0866
1368.62	11.2184
1368.63	11.2907
1368.63	11.9788
1368.64	12.9156
1368.64	13.1054
1368.65	12.9873
1368.65	12.8698
1368.66	12.61
1368.66	12.5754
1368.67	13.0838
1368.67	13.4345
1368.68	13.7633
1368.68	13.5672
1368.69	13.5608
1368.69	13.9042
1368.77	15.2846
1368.78	15.9703
1368.78	16.7945
1368.79	16.9211
1368.79	16.3409
1368.8	16.0951
1368.8	16.1519
1368.81	16.1908
1368.81	15.9502
1368.82	15.6781
1368.82	15.675
1368.83	15.8239
1368.83	16.048
1368.84	16.4423
1368.84	16.5089
1368.85	16.1436
1368.85	15.7337
1368.86	15.833
1368.86	16.403
1368.87	16.6834
1368.87	16.7672
1368.88	16.7776
1368.88	17.0384
1368.88	17.97
1368.89	18.6626
1368.89	17.9931
1368.9	17.0561
1368.9	16.9609
1368.91	16.8251
1368.91	16.6646
1368.92	16.987
1368.92	16.8089
1368.93	16.8625
1368.93	17.723
1368.94	18.1969
1368.94	17.4641
1368.95	16.6783
1368.95	16.5449
1368.96	17.0183
1368.96	17.2425
1368.97	17.0625
1368.97	17.6918
1369.02	15.953
1369.03	15.9186
1369.03	15.7881
1369.04	15.8652
1369.04	16.2611
1369.05	16.3532
1369.05	16.6384
1369.06	17.1113
1369.06	16.7452
1369.07	16.4983
1369.07	17.2223
1369.08	18.2769
1369.08	17.7007
1369.09	16.49
1369.09	15.449
1369.1	14.8887
1369.1	15.2471
1369.11	17.4021
1369.11	18.6541
1369.12	16.8351
1369.12	14.7141
1369.12	14.018
1369.13	14.4621
1369.13	14.9206
1369.14	14.0212
1369.14	13.5456
1369.15	14.1546
1369.15	15.3767
1369.16	15.9834
1369.16	15.4804
1369.17	14.7954
1369.17	14.8093
1369.18	15.3832
1369.18	16.008
1369.19	15.4974
1369.19	14.7262
1369.2	14.7203
1369.2	14.7783
1369.21	14.9351
1369.21	14.5596
1369.22	13.7959
1369.22	13.5441
1369.23	14.0939
1369.23	14.6619
1369.24	14.8506
1369.24	15.7186
1369.25	16.8184
1369.26	16.8127
1369.26	15.3106
1369.27	14.3344
1369.27	14.5888
1369.28	15.4153
1369.28	15.9624
1369.29	16.2285
1369.29	16.0797
1369.3	15.6007
1369.3	15.3716
1369.31	15.7617
1369.31	16.4631
1369.32	16.7019
1369.32	15.4666
1369.33	14.4603
1369.33	14.6135
1369.34	15.7933
1369.34	17.1225
1369.35	17.1045
1369.35	16.4057
1369.36	16.2457
1369.36	16.3957
1369.37	17.1071
1369.37	18.3499
1369.38	18.6232
1369.38	17.7995
1369.38	17.2042
1369.39	17.3719
1369.39	17.7115
1369.4	18.2376
1369.4	18.8992
1369.41	18.3335
1369.41	17.5568
1369.42	17.5648
1369.42	17.9608
1369.43	18.3842
1369.43	18.8415
1369.44	19.1237
1369.44	18.4182
1369.45	17.2151
1369.45	16.8287
1369.46	18.5723
1369.46	20.8196
1369.47	20.518
1369.47	18.8156
1369.48	18.2506
1369.48	18.3392
1369.49	18.6343
1369.49	19.0752
1369.5	19.7638
1369.51	21.0282
1369.51	21.9081
1369.52	21.2056
1369.52	21.0952
1369.53	21.5823
1369.53	22.0208
1369.54	23.2431
1369.54	25.3166
1369.55	26.7172
1369.55	26.6602
1369.56	25.67
1369.56	24.5399
1369.57	22.8996
1369.57	22.1208
1369.58	22.0414
1369.58	21.1522
1369.59	20.5907
1369.59	19.3366
1369.6	17.6323
1369.6	17.0582
1369.61	17.2671
1369.61	17.1141
1369.62	16.5689
1369.62	16.5266
1369.62	17.2148
1369.63	17.1486
1369.63	15.5867
1369.64	14.4804
1369.64	14.67
1369.65	15.7439
1369.65	17.1776
1369.66	18.0659
1369.66	17.1633
1369.67	15.2734
1369.67	14.2446
1369.68	13.6584
1369.68	13.6068
1369.69	14.6513
1369.69	16.6651
1369.7	17.5988
1369.7	16.599
1369.71	15.4907
1369.71	15.3756
1369.72	15.1226
1369.72	14.7632
1369.73	14.8058
1369.73	15.419
1369.74	16.5927
1369.74	17.4355
1369.75	17.4272
1369.76	16.8992
1369.76	16.4149
1369.77	16.1944
1369.77	16.6112
1369.78	17.4486
1369.78	18.0969
1369.79	17.6098
1369.79	16.5479
1369.8	16.0633
1369.8	16.0589
1369.81	16.2685
1369.81	16.8123
1369.82	16.8871
1369.82	16.6196
1369.83	16.8778
1369.83	18.1706
1369.84	19.3008
1369.84	19.226
1369.85	19.1178
1369.85	18.8747
1369.86	17.9038
1369.86	16.9895
1369.87	16.2637
1369.87	15.8268
1369.88	15.728
1369.88	15.8362
1369.88	16.4757
1369.89	17.1319
1369.89	16.9337
1369.9	16.1675
1369.9	15.8747
1369.91	16.78
1369.91	17.148
1369.92	16.3384
1369.92	15.7601
1369.93	15.9897
1369.93	16.4176
1369.94	16.4885
1369.94	16.3271
1369.95	16.2363
1370.04	15.7773
1370.05	16.2191
1370.05	16.1263
1370.06	15.637
1370.06	15.4315
1370.07	15.3942
1370.07	15.7666
1370.08	16.8832
1370.08	17.969
1370.09	18.1814
1370.09	18.2149
1370.1	18.1083
1370.1	17.5593
1370.11	16.671
1370.11	16.0046
1370.12	16.1763
1370.12	16.8898
1370.12	17.3155
1370.13	17.3975
1370.13	16.8662
1370.14	16.2011
1370.14	15.9918
1370.15	15.9315
1370.15	16.119
1370.16	16.1922
1370.16	16.2386
1370.17	16.3357
1370.17	16.9212
1370.18	18.3968
1370.18	19.0648
1370.19	17.6936
1370.19	15.6549
1370.2	14.7787
1370.2	14.5138
1370.21	14.7937
1370.21	14.5502
1370.22	13.7182
1370.22	13.2894
1370.23	13.504
1370.23	13.804
1370.24	13.7876
1370.24	13.5765
1370.25	13.7688
1370.26	14.833
1370.26	15.2604
1370.27	15.3555
1370.27	16.2336
1370.28	17.2981
1370.28	17.4792
1370.29	17.5288
1370.29	17.35
1370.3	16.8157
1370.3	16.4277
1370.31	16.6321
1370.31	16.7428
1370.32	16.5005
1370.32	16.0501
1370.33	15.6852
1370.33	15.5757
1370.34	15.4982
1370.34	15.2449
1370.35	14.8945
1370.35	14.2394
1370.36	14.0951
1370.36	14.98
1370.37	16.0915
1370.37	16.26
1370.38	15.9709
1370.38	16.2088
1370.38	16.6257
1370.39	16.651
1370.39	16.191
1370.4	15.8827
1370.4	15.7827
1370.41	15.6658
1370.41	15.3678
1370.42	14.8458
1370.42	14.5429
1370.43	14.3396
1370.43	13.7233
1370.44	13.3282
1370.44	13.8645
1370.45	14.6603
1370.45	15.2176
1370.46	15.5156
1370.46	14.9089
1370.47	13.7989
1370.47	13.3736
1370.48	13.4133
1370.48	13.5409
1370.49	13.7745
1370.49	14.1015
1370.5	14.8582
1370.51	15.2106
1370.51	14.9831
1370.52	14.6475
1370.52	13.865
1370.53	13.3063
1370.53	13.6995
1370.54	14.4559
1370.54	14.0856
1370.55	13.5679
1370.55	14.2207
1370.56	15.1919
1370.56	15.7753
1370.57	16.4687
1370.57	16.2668
1370.58	15.3896
1370.58	14.9849
1370.59	15.0969
1370.59	15.1979
1370.6	15.6063
1370.6	16.3493
1370.61	17.3103
1370.61	17.8095
1370.62	17.9669
1370.62	17.9549
1370.62	17.6667
1370.63	17.2119
1370.63	17.0374
1370.64	17.1388
1370.64	17.1769
1370.65	17.0124
1370.65	16.9776
1370.66	17.0095
1370.66	17.2203
1370.67	17.3191
1370.67	17.0165
1370.68	17.0106
1370.68	17.0047
1370.69	16.9386
1370.69	17.2384
1370.7	17.4243
1370.7	16.6056
1370.71	15.6112
1370.71	15.2947
1370.72	15.4564
1370.72	16.2914
1370.73	15.8253
1370.73	14.0479
1370.74	13.2519
1370.74	13.0662
1370.75	13.4574
1370.76	14.0432
1370.76	14.6796
1370.77	15.606
1370.77	17.077
1370.78	18.0859
1370.78	17.3128
1370.79	16.1149
1370.79	15.7507
1370.8	15.7995
1370.8	15.7668
1370.81	15.7364
1370.81	15.7005
1370.82	15.7527
1370.82	16.8271
1370.83	17.4539
1370.83	16.6522
1370.84	15.7963
1370.84	15.4514
1370.85	15.3568
1370.85	15.0374
1370.86	15.4708
1370.86	16.3639
1370.87	16.4333
1370.87	15.6122
1370.88	15.3979
1370.88	16.823
1370.88	19.448
1370.89	19.2892
1370.89	17.0133
1370.9	16.221
1370.9	16.2966
1370.91	16.0299
1370.91	16.0891
1370.92	16.3052
1370.92	16.4812
1370.93	16.4732
1370.93	16.4718
1370.94	16.7809
1370.94	17.4191
1370.95	18.2935
1370.95	18.1816
1370.96	17.0434
1370.96	16.3417
1370.97	16.2419
1371.08	15.0711
1371.08	15.1549
1371.09	15.4769
1371.09	15.4909
1371.1	15.6702
1371.1	16.1355
1371.11	16.2758
1371.11	16.198
1371.12	16.0916
1371.12	16.3366
1371.12	16.0201
1371.13	15.1337
1371.13	14.4748
1371.14	14.229
1371.14	13.957
1371.15	13.8728
1371.15	14.1033
1371.16	13.8446
1371.16	12.8377
1371.17	11.9253
1371.17	11.673
1371.18	11.9322
1371.18	12.3224
1371.19	12.525
1371.19	12.7232
1371.2	12.5843
1371.2	12.3971
1371.21	12.1625
1371.21	11.7657
1371.22	11.6362
1371.22	11.8069
1371.23	12.2963
1371.23	13.1818
1371.24	12.7944
1371.24	11.7502
1371.25	11.5705
1371.26	11.3858
1371.26	11.1393
1371.27	10.9849
1371.27	10.9734
1371.28	11.1474
1371.28	11.5243
1371.29	12.1016
1371.29	13.3029
1371.3	14.8409
1371.3	15.887
1371.31	16.238
1371.31	16.2911
1371.32	16.1003
1371.32	15.0706
1371.33	13.594
1371.33	12.6077
1371.34	12.3634
1371.34	12.6008
1371.35	12.8825
1371.35	13.6864
1371.36	14.5242
1371.36	14.0463
1371.37	13.5121
1371.37	13.6845
1371.38	14.0656
1371.38	14.7724
1371.38	15.6447
1371.39	16.2153
1371.39	15.7541
1371.4	14.9861
1371.4	14.9912
1371.41	15.671
1371.41	16.4706
1371.42	16.1187
1371.42	15.3117
1371.43	15.4487
1371.43	16.2926
1371.44	16.2786
1371.44	15.5305
1371.45	15.3845
1371.45	15.5082
1371.46	15.6039
1371.46	15.5173
1371.47	14.5383
1371.47	13.6884
1371.48	13.5887
1371.48	14.1603
1371.49	15.4679
1371.49	16.9149
1371.5	17.1028
1371.51	15.9149
1371.51	14.1581
1371.52	13.3696
1371.52	13.2872
1371.53	13.3342
1371.53	13.6395
1371.54	13.8669
1371.54	13.6326
1371.55	13.4147
1371.55	13.3889
1371.56	13.8006
1371.56	14.5976
1371.57	15.4128
1371.57	15.806
1371.58	15.4574
1371.58	15.1472
1371.59	15.699
1371.59	16.9523
1371.6	17.4295
1371.6	16.7043
1371.61	16.3174
1371.61	16.9047
1371.62	17.9456
1371.62	17.3246
1371.62	16.699
1371.63	17.4643
1371.63	18.6579
1371.64	19.2636
1371.64	19.3537
1371.65	19.388
1371.65	18.4479
1371.66	17.0422
1371.66	16.8817
1371.67	17.6408
1371.67	18.1899
1371.68	17.618
1371.68	16.8914
1371.69	16.6223
1371.69	17.0405
1371.7	17.5494
1371.7	17.6308
1371.71	17.3747
1371.71	17.6559
1371.72	17.5209
1371.72	15.9134
1371.73	15.0879
1371.73	15.6253
1371.74	16.4051
1371.74	17.1589
1371.75	16.9724
1371.76	15.7153
1371.76	14.8735
1371.77	14.8793
1371.77	14.9156
1371.78	15.2813
1371.78	16.5623
1371.79	16.9913
1371.79	15.2322
1371.8	13.8355
1371.8	13.948
1371.81	14.3437
1371.81	13.8927
1371.82	13.255
1371.82	13.0287
1371.83	13.0634
1371.83	13.5543
1371.84	14.1517
1371.84	14.4018
1371.94	15.7213
1371.94	14.7758
1371.95	14.3733
1371.95	14.3394
1371.96	14.2489
1371.96	14.4273
1371.97	15.3981
1371.97	17.0394
1372.02	16.7698
1372.03	17.2593
1372.03	16.1763
1372.04	15.4554
1372.04	15.1444
1372.05	15.3246
1372.05	15.7593
1372.06	15.3307
1372.06	14.4235
1372.07	14.1383
1372.07	14.1205
1372.08	14.0673
1372.08	14.1091
1372.09	14.3376
1372.09	14.7653
1372.1	15.2164
1372.1	14.8549
1372.11	14.0783
1372.11	14.2987
1372.12	14.8999
1372.12	14.6434
1372.12	14.2741
1372.13	14.2743
1372.13	14.2691
1372.14	14.254
1372.14	14.2334
1372.15	14.2486
1372.15	14.3128
1372.16	14.2168
1372.16	13.9691
1372.17	13.8763
1372.17	13.9094
1372.18	14.6005
1372.18	16.0135
1372.19	17.2369
1372.19	17.7333
1372.2	16.9505
1372.2	15.336
1372.21	14.9082
1372.21	16.0861
1372.22	17.3409
1372.22	17.1697
1372.23	15.842
1372.23	14.7214
1372.24	14.722
1372.24	14.4618
1372.25	13.528
1372.26	12.9691
1372.26	13.2725
1372.27	14.2491
1372.27	14.9466
1372.28	14.5295
1372.28	13.6094
1372.29	13.0311
1372.29	12.9868
1372.3	13.2075
1372.3	13.7763
1372.31	13.2809
1372.31	12.4253
1372.32	12.611
1372.32	13.6996
1372.33	15.2114
1372.33	16.1528
1372.34	15.3034
1372.34	13.8306
1372.35	13.199
1372.35	13.0742
1372.36	13.3297
1372.36	14.4621
1372.37	16.0342
1372.37	16.9528
1372.38	16.6275
1372.38	15.8802
1372.38	15.8784
1372.39	15.7836
1372.39	15.5577
1372.4	15.7377
1372.4	16.1196
1372.41	16.3243
1372.41	16.3982
1372.42	16.1906
1372.42	15.8535
1372.43	16.7099
1372.43	17.5997
1372.44	16.8013
1372.44	16.1332
1372.45	16.303
1372.45	16.7566
1372.46	17.3761
1372.46	17.2938
1372.47	16.7382
1372.47	17.1716
1372.48	18.2584
1372.48	19.0523
1372.49	19.5862
1372.49	18.9937
1372.5	18.0207
1372.51	17.9955
1372.51	17.7666
1372.52	17.2287
1372.52	17.2398
1372.53	17.1847
1372.53	16.7979
1372.54	16.5349
1372.54	16.4458
1372.55	16.2939
1372.55	15.7788
1372.56	15.4559
1372.56	15.4228
1372.57	15.8022
1372.57	16.8638
1372.58	17.8418
1372.58	17.3895
1372.59	16.1848
1372.59	15.1411
1372.6	14.3825
1372.6	14.1067
1372.61	13.9593
1372.61	13.9528
1372.62	14.3318
1372.62	15.2654
1372.62	16.5152
1372.63	17.7231
1372.63	18.1181
1372.64	17.311
1372.64	15.7903
1372.65	15.4562
1372.65	16.118
1372.66	16.7657
1372.66	17.3767
1372.67	18.0738
1372.67	19.125
1372.68	20.6206
1372.68	22.4623
1372.69	24.9945
1372.69	28.1952
1372.7	31.6492
1372.7	34.8403
1372.71	37.1242
1372.71	38.3675
1372.72	38.9184
1372.72	37.0638
1372.73	33.4344
1372.73	29.0106
1372.74	23.8763
1372.74	20.9785
1372.75	20.0953
1372.76	20.2478
1372.76	20.7054
1372.77	21.1378
1372.77	21.1368
1372.78	19.5798
1372.78	17.6199
1372.79	16.8489
1372.79	16.9134
1372.8	16.6898
1372.8	16.7028
1372.81	16.6118
1372.81	16.0894
1372.82	16.2605
1372.82	17.0321
1372.83	17.3522
1372.83	16.6505
1372.84	16.3097
1372.84	16.2866
1372.85	16.0995
1372.85	15.5925
1372.86	15.621
1372.86	15.5257
1372.87	14.9044
1372.87	14.6861
1372.88	14.2536
1372.88	13.9049
1372.88	14.0681
1372.89	14.6633
1372.89	15.1955
1372.9	15.397
1372.9	15.1854
1372.91	15.1647
1372.91	15.0278
1372.92	14.6102
1372.92	14.5528
1372.93	14.8103
1372.93	15.1342
1372.94	15.5576
1372.94	15.6072
1372.95	15.7767
1372.95	15.8859
1372.96	16.1043
1372.96	16.7736
1372.97	16.6217
1373.05	16.8818
1373.05	16.3549
1373.06	15.116
1373.06	13.8055
1373.07	13.0763
1373.07	12.8002
1373.08	12.6274
1373.08	12.4836
1373.09	12.2614
1373.09	12.065
1373.1	11.938
1373.1	11.953
1373.11	12.0805
1373.11	12.2744
1373.12	12.9015
1373.12	13.5793
1373.12	14.1572
1373.13	14.9734
1373.13	15.8012
1373.14	16.3407
1373.14	17.1611
1373.15	17.6222
1373.15	17.4307
1373.16	16.493
1373.16	15.3133
1373.17	14.6721
1373.17	14.532
1373.18	14.7335
1373.18	14.9099
1373.19	15.174
1373.19	15.4376
1373.2	15.2714
1373.2	14.5468
1373.21	13.7968
1373.21	13.7296
1373.22	14.2844
1373.22	14.5708
1373.23	14.7263
1373.23	15.534
1373.24	16.2236
1373.24	16.4395
1373.25	16.7569
1373.26	17.1766
1373.26	17.6213
1373.27	17.652
1373.27	17.3427
1373.28	17.0733
1373.28	16.8543
1373.29	16.4261
1373.29	16.1092
1373.3	16.1207
1373.3	16.5272
1373.31	16.955
1373.31	16.4985
1373.32	15.9382
1373.32	16.3074
1373.33	16.415
1373.33	15.984
1373.34	15.9976
1373.34	16.1145
1373.35	15.8335
1373.35	15.9039
1373.36	16.9741
1373.36	17.7563
1373.37	16.8406
1373.37	15.9843
1373.38	16.0225
1373.38	16.1143
1373.38	15.9555
1373.39	15.7355
1373.39	15.5776
1373.4	15.7623
1373.4	16.0997
1373.41	15.901
1373.41	15.2486
1373.42	15.0657
1373.42	16.4251
1373.43	18.2676
1373.43	17.2965
1373.44	15.5201
1373.44	15.2666
1373.45	15.8274
1373.45	16.3819
1373.46	16.1096
1373.46	14.5022
1373.47	12.9917
1373.47	12.7371
1373.48	12.9705
1373.48	12.8725
1373.49	12.6
1373.49	13.0282
1373.5	14.0763
1373.51	14.9206
1373.51	14.6763
1373.52	14.1489
1373.52	13.9407
1373.53	14.0803
1373.53	14.1809
1373.54	14.0942
1373.54	13.8104
1373.55	13.7559
1373.55	14.202
1373.56	15.1141
1373.56	15.5958
1373.57	15.3431
1373.57	15.0327
1373.58	15.1042
1373.58	15.2658
1373.59	15.2505
1373.59	14.9908
1373.6	15.0228
1373.6	15.2347
1373.61	15.1995
1373.61	15.3266
1373.62	16.0718
1373.62	17.1574
1373.62	17.4968
1373.63	16.9131
1373.63	15.4735
1373.64	14.289
1373.64	13.8219
1373.65	13.7369
1373.65	13.8487
1373.66	14.3236
1373.66	14.3972
1373.67	13.841
1373.67	13.343
1373.68	13.6415
1373.68	14.8128
1373.69	15.4315
1373.69	14.6331
1373.7	14.0082
1373.7	13.8116
1373.71	13.7612
1373.71	13.8272
1373.72	14.0472
1373.72	15.0477
1373.73	16.8519
1373.73	16.7894
1373.74	15.0332
1373.74	14.4006
1373.75	14.3198
1373.76	14.0257
1373.76	13.5794
1373.77	13.1775
1373.77	13.0602
1373.78	13.3871
1373.78	14.3338
1373.79	15.7265
1373.79	15.4968
1373.8	14.4025
1373.8	14.603
1373.81	15.787
1373.81	16.0077
1373.82	14.6151
1373.82	13.6174
1373.83	13.7148
1373.83	14.3451
1373.84	15.2563
1373.84	15.4017
1373.85	14.6628
1373.85	14.6478
1373.86	15.5082
1373.86	16.0792
1373.87	15.1691
1373.87	14.3309
1373.88	14.7561
1373.88	15.9245
1373.88	17.034
1373.89	17.5668
1373.89	17.6264
1373.9	17.531
1373.9	17.0745
1373.91	15.9136
1373.91	14.603
1373.92	14.1667
1373.92	14.7103
1373.93	15.7319
1373.93	17.545
1373.94	19.307
1373.94	18.9771
1373.95	18.2351
1373.95	18.3457
1373.96	17.8874
1373.96	17.2424
1373.97	17.7794
1373.97	18.304
1374.02	16.1608
1374.03	15.4572
1374.03	16.0545
1374.04	15.8435
1374.04	15.5288
1374.05	15.3925
1374.05	14.0845
1374.06	13.2143
1374.06	13.4704
1374.07	13.9826
1374.07	13.4933
1374.08	13.0906
1374.08	14.0232
1374.09	15.245
1374.09	15.9834
1374.1	16.704
1374.1	16.939
1374.11	15.7967
1374.11	14.6633
1374.12	14.3277
1374.12	13.9645
1374.12	14.0277
1374.13	14.1406
1374.13	14.4509
1374.14	14.8906
1374.14	14.93
1374.15	15.0673
1374.15	15.3166
1374.16	15.1853
1374.16	14.6608
1374.17	13.6777
1374.17	12.8016
1374.18	12.5154
1374.18	12.3802
1374.19	12.5141
1374.19	12.8229
1374.2	12.5355
1374.2	12.5166
1374.21	13.5065
1374.21	14.0425
1374.22	13.8381
1374.22	14.1197
1374.23	13.8043
1374.23	12.9939
1374.24	12.793
1374.24	12.8387
1374.25	13.1963
1374.26	14.1857
1374.26	15.7022
1374.27	15.9785
1374.27	14.7615
1374.28	14.0845
1374.28	13.9696
1374.29	13.6808
1374.29	13.4185
1374.3	13.5898
1374.3	14.0174
1374.31	14.1261
1374.31	13.9681
1374.32	14.5223
1374.32	15.3607
1374.33	15.6333
1374.33	16.0972
1374.34	16.4951
1374.34	15.2358
1374.35	13.8833
1374.35	13.5785
1374.36	13.8546
1374.36	14.125
1374.37	13.9106
1374.37	13.8281
1374.38	14.7394
1374.38	15.2761
1374.38	14.2216
1374.39	12.9732
1374.39	12.4782
1374.4	12.8473
1374.4	13.4125
1374.41	13.4635
1374.41	13.7725
1374.42	14.6149
1374.42	15.1384
1374.43	15.6249
1374.43	15.8776
1374.44	15.3342
1374.44	14.4817
1374.45	13.963
1374.45	14.0946
1374.46	14.1436
1374.46	13.8377
1374.47	13.6365
1374.47	13.7943
1374.48	13.5098
1374.48	12.835
1374.49	12.4395
1374.49	12.5289
1374.5	13.4968
1374.51	14.8029
1374.51	14.9424
1374.52	14.3901
1374.52	14.4279
1374.53	14.2177
1374.53	13.854
1374.54	13.7716
1374.54	13.6359
1374.55	13.6508
1374.55	13.6083
1374.56	13.8302
1374.56	14.4496
1374.57	14.9938
1374.57	15.2447
1374.58	14.891
1374.58	14.7985
1374.59	14.8556
1374.59	15.3247
1374.6	15.4484
1374.6	15.0473
1374.61	14.6529
1374.61	13.9251
1374.62	13.378
1374.62	13.1994
1374.62	13.1295
1374.63	13.0558
1374.63	13.2391
1374.64	13.7623
1374.64	14.2725
1374.65	14.5264
1374.65	14.5303
1374.66	14.7805
1374.66	14.7273
1374.67	14.2767
1374.67	13.8695
1374.68	13.8238
1374.68	14.1813
1374.69	14.461
1374.69	15.1381
1374.7	16.1494
1374.7	16.5972
1374.71	16.0616
1374.71	15.7307
1374.72	16.1966
1374.72	16.4077
1374.73	16.357
1374.73	16.4451
1374.74	17.3064
1374.74	18.032
1374.75	17.528
1374.76	16.1543
1374.76	15.3984
1374.77	15.3374
1374.77	15.4074
1374.94	16.3035
1374.95	15.557
1374.95	15.1558
1374.96	15.3221
1374.96	15.0862
1374.97	14.9994
1375.08	19.7275
1375.08	21.1089
1375.09	21.5247
1375.09	20.6163
1375.1	19.7588
1375.1	19.3265
1375.11	19.2571
1375.11	19.8475
1375.12	20.2655
1375.12	20.3065
1375.12	20.7527
1375.13	21.7084
1375.13	22.3986
1375.14	22.9711
1375.14	22.7285
1375.15	21.3391
1375.15	20.0329
1375.16	18.3514
1375.16	16.2698
1375.17	15.3168
1375.17	15.0568
1375.18	14.8666
1375.18	15.2364
1375.19	14.8091
1375.19	13.7709
1375.2	13.3866
1375.2	13.4111
1375.21	13.6308
1375.21	14.4905
1375.22	15.908
1375.22	17.4002
1375.23	17.4354
1375.23	15.4473
1375.24	13.5765
1375.24	13.1025
1375.25	13.5383
1375.26	14.16
1375.26	14.2293
1375.27	14.5112
1375.27	14.9774
1375.28	15.1573
1375.28	15.3526
1375.29	15.7404
1375.29	16.2702
1375.3	16.926
1375.3	17.0998
1375.31	15.6421
1375.31	13.6762
1375.32	13.1026
1375.32	13.8247
1375.33	14.7468
1375.33	14.6639
1375.34	14.1074
1375.34	13.8646
1375.35	13.8685
1375.35	14.2719
1375.36	14.6143
1375.36	14.7488
1375.37	14.6882
1375.37	14.5796
1375.38	14.7025
1375.38	14.8932
1375.38	15.0447
1375.39	15.121
1375.39	15.1722
1375.4	15.4019
1375.4	16.1335
1375.41	17.4106
1375.41	18.6571
1375.42	18.8266
1375.42	18.1051
1375.43	17.5101
1375.43	17.5544
1375.44	17.8207
1375.44	18.2493
1375.45	18.4814
1375.45	18.7136
1375.46	18.9307
1375.46	18.8978
1375.47	18.6133
1375.47	18.1092
1375.48	17.6972
1375.48	17.4154
1375.49	16.8822
1375.49	16.314
1375.5	16.1018
1375.51	16.6122
1375.51	17.146
1375.52	17.6767
1375.52	18.4732
1375.53	18.7769
1375.53	17.2565
1375.54	15.6093
1375.54	14.9336
1375.55	14.5314
1375.55	14.314
1375.56	14.246
1375.56	14.2888
1375.57	14.4406
1375.57	14.6229
1375.58	14.5991
1375.58	14.2786
1375.59	13.8062
1375.59	13.8796
1375.6	14.6165
1375.6	15.8511
1375.61	16.688
1375.61	16.1952
1375.62	14.7891
1375.62	14.2119
1375.62	14.6297
1375.63	15.7124
1375.63	16.2823
1375.64	15.6799
1375.64	14.6
1375.65	14.0813
1375.65	14.6402
1375.66	15.4302
1375.66	15.6753
1375.67	15.5431
1375.67	15.2929
1375.68	15.4025
1375.68	15.8854
1375.69	15.6503
1375.69	14.8857
1375.7	14.4735
1375.7	14.7402
1375.71	15.9577
1375.71	17.1939
1375.72	17.8894
1375.72	18.9258
1375.73	18.4307
1375.73	16.6105
1375.74	15.2498
1375.74	15.0468
1375.75	15.4563
1375.76	16.2228
1375.76	16.7532
1375.77	15.6276
1375.77	15.1202
1375.78	16.6874
1375.78	18.3967
1375.79	18.7202
1375.79	17.8218
1375.8	17.0292
1375.8	18.3185
1375.81	19.4713
1375.81	18.2613
1375.82	16.5724
1375.82	16.4752
1375.83	17.8671
1375.83	18.733
1375.84	18.4325
1375.84	18.3556
1375.85	18.9116
1375.85	20.1866
1375.86	21.0305
1375.86	21.0885
1375.87	20.0346
1375.87	18.7517
1375.88	18.5159
1375.88	19.5831
1375.88	21.431
1375.89	22.1514
1375.89	20.4776
1375.9	17.8735
1375.9	16.5666
1375.91	16.2889
1375.91	16.2172
1375.92	16.2279
1375.92	15.7139
1375.93	15.021
1375.93	15.1013
1375.94	15.6592
1375.94	15.6208
1375.95	15.5637
1375.95	16.1481
1375.96	16.1919
1375.96	15.8144
1375.97	15.4786
1376.05	15.856
1376.06	16.1543
1376.06	16.3494
1376.07	16.4461
[truncated: 1,631 more rows]

## Sheet: Conductivity
%Depth(m)	Cond(microS/cm)
1365	NaN
1365	NaN
1365	NaN
1365	NaN
1365	NaN
1365.01	NaN
1365.01	NaN
1365.01	NaN
1365.01	NaN
1365.01	NaN
1365.01	NaN
1365.01	NaN
1365.01	NaN
1365.01	NaN
1365.01	NaN
1365.02	NaN
1365.02	NaN
1365.02	NaN
1365.02	NaN
1365.02	NaN
1365.02	NaN
1365.02	NaN
1365.02	NaN
1365.02	NaN
1365.02	NaN
1365.03	NaN
1365.03	1.38
1365.03	1.39
1365.03	1.41
1365.03	1.44
1365.03	1.45
1365.03	1.48
1365.03	1.51
1365.03	1.53
1365.03	1.54
1365.04	1.56
1365.04	1.59
1365.04	1.62
1365.04	1.65
1365.04	1.67
1365.04	1.69
1365.04	1.71
1365.04	1.72
1365.04	1.73
1365.04	1.74
1365.05	1.75
1365.05	1.76
1365.05	1.76
1365.05	1.76
1365.05	1.77
1365.05	1.78
1365.05	1.78
1365.05	1.79
1365.05	1.8
1365.05	1.81
1365.06	1.84
1365.06	1.85
1365.06	1.87
1365.06	1.9
1365.06	1.91
1365.06	1.93
1365.06	1.95
1365.06	1.97
1365.06	1.98
1365.06	1.99
1365.07	2
1365.07	2.02
1365.07	2.01
1365.07	2.02
1365.07	2.02
1365.07	2.01
1365.07	2
1365.07	2
1365.07	1.99
1365.07	1.99
1365.08	1.98
1365.08	1.97
1365.08	1.95
1365.08	1.94
1365.08	1.91
1365.08	1.91
1365.08	1.9
1365.08	1.88
1365.08	1.86
1365.08	1.84
1365.09	1.83
1365.09	1.82
1365.09	1.8
1365.09	1.79
1365.09	1.77
1365.09	1.76
1365.09	1.75
1365.09	1.74
1365.09	1.73
1365.09	1.72
1365.1	1.72
1365.1	1.71
1365.1	1.72
1365.1	1.71
1365.1	1.71
1365.1	1.71
1365.1	1.71
1365.1	1.71
1365.1	1.71
1365.1	1.71
1365.11	1.71
1365.11	1.7
1365.11	1.7
1365.11	1.7
1365.11	1.69
1365.11	1.7
1365.11	1.69
1365.11	1.69
1365.11	1.69
1365.11	1.69
1365.12	1.7
1365.12	1.71
1365.12	1.72
1365.12	1.74
1365.12	1.76
1365.12	1.79
1365.12	1.82
1365.12	1.85
1365.12	1.89
1365.12	1.92
1365.12	1.94
1365.13	1.98
1365.13	2.01
1365.13	2.03
1365.13	2.08
1365.13	2.11
1365.13	2.14
1365.13	2.16
1365.13	2.19
1365.13	2.21
1365.13	2.23
1365.14	2.24
1365.14	2.26
1365.14	2.29
1365.14	2.3
1365.14	2.33
1365.14	2.35
1365.14	2.38
1365.14	2.38
1365.14	2.38
1365.14	2.4
1365.15	2.41
1365.15	2.41
1365.15	2.41
1365.15	2.41
1365.15	2.41
1365.15	2.4
1365.15	2.39
1365.15	2.37
1365.15	2.37
1365.15	2.35
1365.16	2.34
1365.16	2.33
1365.16	2.32
1365.16	2.31
1365.16	2.31
1365.16	2.3
1365.16	2.3
1365.16	2.29
1365.16	2.29
1365.16	2.29
1365.17	2.29
1365.17	2.28
1365.17	2.27
1365.17	2.27
1365.17	2.26
1365.17	2.25
1365.17	2.24
1365.17	2.23
1365.17	2.21
1365.17	2.2
1365.18	2.18
1365.18	2.16
1365.18	2.15
1365.18	2.13
1365.18	2.1
1365.18	2.08
1365.18	2.05
1365.18	2.03
1365.18	2.01
1365.18	1.99
1365.19	1.96
1365.19	1.94
1365.19	1.92
1365.19	1.89
1365.19	1.87
1365.19	1.85
1365.19	1.83
1365.19	1.81
1365.19	1.79
1365.19	1.77
1365.2	1.76
1365.2	1.74
1365.2	1.73
1365.2	1.72
1365.2	1.71
1365.2	1.71
1365.2	1.71
1365.2	1.7
1365.2	1.69
1365.2	1.69
1365.21	1.69
1365.21	1.7
1365.21	1.7
1365.21	1.71
1365.21	1.72
1365.21	1.73
1365.21	1.74
1365.21	1.73
1365.21	1.78
1365.21	1.8
1365.22	1.83
1365.22	1.86
1365.22	1.9
1365.22	1.94
1365.22	1.98
1365.22	2.01
1365.22	2.04
1365.22	2.09
1365.22	2.12
1365.22	2.16
1365.23	2.19
1365.23	2.22
1365.23	2.23
1365.23	2.24
1365.23	2.24
1365.23	2.25
1365.23	2.23
1365.23	2.22
1365.23	2.19
1365.23	2.16
1365.24	2.12
1365.24	2.08
1365.24	2.04
1365.24	2.01
1365.24	1.98
1365.24	1.94
1365.24	1.9
1365.24	1.86
1365.24	1.83
1365.24	1.8
1365.25	1.79
1365.25	1.77
1365.25	1.76
1365.25	1.75
1365.25	1.73
1365.25	1.73
1365.25	1.72
1365.25	1.72
1365.25	1.71
1365.26	1.71
1365.26	1.71
1365.26	1.71
1365.26	1.71
1365.26	1.71
1365.26	1.7
1365.26	1.71
1365.26	1.7
1365.26	1.69
1365.26	1.69
1365.27	1.68
1365.27	1.67
1365.27	1.67
1365.27	1.66
1365.27	1.66
1365.27	1.65
1365.27	1.64
1365.27	1.65
1365.27	1.64
1365.27	1.64
1365.28	1.65
1365.28	1.64
1365.28	1.65
1365.28	1.65
1365.28	1.65
1365.28	1.66
1365.28	1.67
1365.28	1.68
1365.28	1.69
1365.28	1.7
1365.29	1.71
1365.29	1.72
1365.29	1.74
1365.29	1.76
1365.29	1.77
1365.29	1.79
1365.29	1.8
1365.29	1.82
1365.29	1.84
1365.29	1.86
1365.3	1.87
1365.3	1.89
1365.3	1.9
1365.3	1.9
1365.3	1.91
1365.3	1.91
1365.3	1.91
1365.3	1.91
1365.3	1.91
1365.3	1.9
1365.31	1.91
1365.31	1.91
1365.31	1.92
1365.31	1.95
1365.31	1.97
1365.31	2.01
1365.31	2.05
1365.31	2.1
1365.31	2.16
1365.31	2.21
1365.32	2.29
1365.32	2.34
1365.32	2.4
1365.32	2.43
1365.32	2.46
1365.32	2.48
1365.32	2.49
1365.32	2.5
1365.32	2.51
1365.32	2.5
1365.33	2.51
1365.33	2.5
1365.33	2.48
1365.33	2.48
1365.33	2.47
1365.33	2.46
1365.33	2.45
1365.33	2.43
1365.33	2.41
1365.33	2.4
1365.34	2.38
1365.34	2.37
1365.34	2.34
1365.34	2.32
1365.34	2.31
1365.34	2.29
1365.34	2.27
1365.34	2.25
1365.34	2.23
1365.34	2.21
1365.35	2.19
1365.35	2.18
1365.35	2.15
1365.35	2.13
1365.35	2.1
1365.35	2.07
1365.35	2.04
1365.35	2.02
1365.35	1.99
1365.35	1.97
1365.36	1.95
1365.36	1.93
1365.36	1.91
1365.36	1.9
1365.36	1.88
1365.36	1.87
1365.36	1.86
1365.36	1.85
1365.36	1.84
1365.36	1.83
1365.37	1.83
1365.37	1.81
1365.37	1.81
1365.37	1.8
1365.37	1.78
1365.37	1.77
1365.37	1.76
1365.37	1.73
1365.37	1.72
1365.37	1.7
1365.38	1.68
1365.38	1.66
1365.38	1.65
1365.38	1.63
1365.38	1.61
1365.38	1.6
1365.38	1.58
1365.38	1.57
1365.38	1.57
1365.38	1.56
1365.38	1.55
1365.39	1.55
1365.39	1.54
1365.39	1.53
1365.39	1.52
1365.39	1.51
1365.39	1.51
1365.39	1.5
1365.39	1.49
1365.39	1.47
1365.39	1.46
1365.4	1.45
1365.4	1.43
1365.4	1.42
1365.4	1.4
1365.4	1.38
1365.4	1.37
1365.4	1.35
1365.4	1.34
1365.4	1.33
1365.4	1.31
1365.41	1.3
1365.41	1.29
1365.41	1.28
1365.41	1.28
1365.41	1.27
1365.41	1.26
1365.41	1.27
1365.41	1.28
1365.41	1.29
1365.41	1.29
1365.42	1.3
1365.42	1.31
1365.42	1.32
1365.42	1.33
1365.42	1.34
1365.42	1.36
1365.42	1.36
1365.42	1.38
1365.42	1.38
1365.42	1.38
1365.43	1.4
1365.43	1.4
1365.43	1.4
1365.43	1.4
1365.43	1.41
1365.43	1.42
1365.43	1.43
1365.43	1.44
1365.43	1.46
1365.43	1.48
1365.44	1.5
1365.44	1.52
1365.44	1.55
1365.44	1.58
1365.44	1.6
1365.44	1.62
1365.44	1.64
1365.44	1.65
1365.44	1.66
1365.44	1.67
1365.45	1.68
1365.45	1.69
1365.45	1.7
1365.45	1.7
1365.45	1.71
1365.45	1.71
1365.45	1.72
1365.45	1.73
1365.45	1.74
1365.45	1.75
1365.46	1.76
1365.46	1.77
1365.46	1.78
1365.46	1.79
1365.46	1.8
1365.46	1.8
1365.46	1.81
1365.46	1.82
1365.46	1.82
1365.46	1.82
1365.47	1.83
1365.47	1.83
1365.47	1.84
1365.47	1.84
1365.47	1.84
1365.47	1.85
1365.47	1.86
1365.47	1.86
1365.47	1.87
1365.47	1.88
1365.48	1.88
1365.48	1.88
1365.48	1.89
1365.48	1.89
1365.48	1.88
1365.48	1.89
1365.48	1.88
1365.48	1.88
1365.48	1.88
1365.48	1.88
1365.49	1.87
1365.49	1.87
1365.49	1.86
1365.49	1.84
1365.49	1.83
1365.49	1.82
1365.49	1.81
1365.49	1.8
1365.49	1.8
1365.49	1.79
1365.5	1.78
1365.5	1.77
1365.5	1.77
1365.5	1.76
1365.5	1.76
1365.5	1.76
1365.5	1.76
1365.5	1.76
1365.5	1.76
1365.51	1.76
1365.51	1.77
1365.51	1.78
1365.51	1.78
1365.51	1.78
1365.51	1.79
1365.51	1.8
1365.51	1.82
1365.51	1.84
1365.51	1.87
1365.52	1.9
1365.52	1.92
1365.52	1.95
1365.52	1.98
1365.52	2.01
1365.52	2.03
1365.52	2.06
1365.52	2.09
1365.52	2.11
1365.52	2.13
1365.53	2.15
1365.53	2.17
1365.53	2.17
1365.53	2.17
1365.53	2.17
1365.53	2.17
1365.53	2.15
1365.53	2.14
1365.53	2.12
1365.53	2.1
1365.54	2.07
1365.54	2.05
1365.54	2.02
1365.54	1.98
1365.54	1.95
1365.54	1.91
1365.54	1.88
1365.54	1.84
1365.54	1.81
1365.54	1.79
1365.55	1.76
1365.55	1.72
1365.55	1.69
1365.55	1.66
1365.55	1.63
1365.55	1.6
1365.55	1.57
1365.55	1.55
1365.55	1.54
1365.55	1.53
1365.56	1.52
1365.56	1.51
1365.56	1.5
1365.56	1.49
1365.56	1.49
1365.56	1.48
1365.56	1.48
1365.56	NaN
1365.56	NaN
1365.56	NaN
1365.57	NaN
1365.57	NaN
1365.57	NaN
1365.57	1.47
1365.57	1.47
1365.57	1.46
1365.57	1.45
1365.57	1.45
1365.57	1.44
1365.57	1.43
1365.58	1.43
1365.58	1.43
1365.58	1.43
1365.58	1.44
1365.58	1.45
1365.58	1.46
1365.58	1.47
1365.58	1.49
1365.58	1.52
1365.58	1.54
1365.59	1.57
1365.59	1.59
1365.59	1.62
1365.59	1.64
1365.59	1.66
1365.59	1.68
1365.59	1.69
1365.59	1.7
1365.59	1.71
1365.59	1.71
1365.6	1.71
1365.6	1.71
1365.6	1.71
1365.6	1.7
1365.6	1.69
1365.6	1.68
1365.6	1.67
1365.6	1.66
1365.6	1.66
1365.6	1.64
1365.61	1.64
1365.61	1.64
1365.61	1.63
1365.61	1.63
1365.61	1.63
1365.61	1.64
1365.61	1.62
1365.61	1.64
1365.61	1.65
1365.61	1.66
1365.62	1.66
1365.62	1.66
1365.62	1.67
1365.62	1.66
1365.62	1.66
1365.62	1.66
1365.62	1.66
1365.62	1.66
1365.62	1.66
1365.62	1.66
1365.62	1.67
1365.63	1.68
1365.63	1.68
1365.63	1.67
1365.63	1.69
1365.63	1.69
1365.63	1.7
1365.63	1.71
1365.63	1.72
1365.63	1.74
1365.63	1.74
1365.64	1.76
1365.64	1.78
1365.64	1.81
1365.64	1.83
1365.64	1.86
1365.64	1.88
1365.64	1.9
1365.64	1.92
1365.64	1.94
1365.64	1.95
1365.65	1.96
1365.65	1.97
1365.65	1.97
1365.65	1.97
1365.65	1.97
1365.65	1.96
1365.65	1.96
1365.65	1.94
1365.65	1.94
1365.65	1.94
1365.66	1.93
1365.66	1.92
1365.66	1.92
1365.66	1.9
1365.66	1.89
1365.66	1.88
1365.66	1.88
1365.66	1.87
1365.66	1.86
1365.66	1.84
1365.67	1.83
1365.67	1.81
1365.67	1.79
1365.67	1.78
1365.67	1.76
1365.67	1.76
1365.67	1.72
1365.67	1.71
1365.67	1.69
1365.67	1.67
1365.68	1.66
1365.68	1.64
1365.68	1.63
1365.68	1.62
1365.68	1.62
1365.68	1.62
1365.68	1.62
1365.68	1.62
1365.68	1.62
1365.68	1.64
1365.69	1.65
1365.69	1.68
1365.69	1.69
1365.69	1.7
1365.69	1.72
1365.69	1.73
1365.69	1.74
1365.69	1.76
1365.69	1.78
1365.69	1.79
1365.7	1.8
1365.7	1.81
1365.7	1.83
1365.7	1.85
1365.7	1.87
1365.7	1.9
1365.7	1.93
1365.7	1.94
1365.7	1.96
1365.7	1.97
1365.71	1.99
1365.71	2
1365.71	2
1365.71	2.01
1365.71	2.01
1365.71	2.01
1365.71	2.01
1365.71	1.99
1365.71	1.98
1365.71	1.97
1365.72	1.96
1365.72	1.96
1365.72	1.95
1365.72	1.94
1365.72	1.94
1365.72	1.94
1365.72	1.94
1365.72	1.94
1365.72	1.95
1365.72	1.96
1365.73	1.96
1365.73	1.97
1365.73	1.98
1365.73	1.99
1365.73	2
1365.73	2.01
1365.73	2.01
1365.73	2.02
1365.73	2.03
1365.73	2.03
1365.74	2.04
1365.74	2.05
1365.74	2.06
1365.74	2.07
1365.74	2.08
1365.74	2.08
1365.74	2.1
1365.74	2.1
1365.74	2.11
1365.74	2.12
1365.75	2.13
1365.75	2.13
1365.75	2.12
1365.75	2.12
1365.75	2.12
1365.75	2.11
1365.75	2.1
1365.75	2.1
1365.75	2.1
1365.76	2.1
1365.76	2.07
1365.76	2.07
1365.76	2.07
1365.76	2.06
1365.76	2.05
1365.76	2.06
1365.76	2.06
1365.76	2.06
1365.76	2.08
1365.77	2.09
1365.77	2.11
1365.77	2.13
1365.77	2.16
1365.77	2.2
1365.77	2.24
1365.77	2.28
1365.77	2.34
1365.77	2.38
1365.77	2.43
1365.78	2.48
1365.78	2.53
1365.78	2.58
1365.78	2.62
1365.78	2.68
1365.78	2.72
1365.78	2.76
1365.78	2.79
1365.78	2.8
1365.78	2.81
1365.79	2.82
1365.79	2.81
1365.79	2.8
1365.79	2.78
1365.79	2.75
1365.79	2.71
1365.79	2.67
1365.79	2.62
1365.79	2.57
1365.79	2.52
1365.8	2.47
1365.8	2.42
1365.8	2.39
1365.8	2.35
1365.8	2.3
1365.8	2.27
1365.8	2.25
1365.8	2.22
1365.8	2.19
1365.8	2.17
1365.81	2.15
1365.81	2.13
1365.81	2.12
1365.81	2.1
1365.81	2.09
1365.81	2.09
1365.81	2.08
1365.81	2.08
1365.81	2.08
1365.81	2.08
1365.82	2.08
1365.82	2.08
1365.82	2.08
1365.82	2.08
1365.82	2.08
1365.82	2.08
1365.82	2.08
1365.82	2.07
1365.82	2.08
1365.82	2.08
1365.83	2.09
1365.83	2.09
1365.83	2.09
1365.83	2.1
1365.83	2.1
1365.83	2.11
1365.83	2.12
1365.83	2.13
1365.83	2.14
1365.83	2.15
1365.84	2.17
1365.84	2.18
1365.84	2.18
1365.84	2.19
1365.84	2.19
1365.84	2.19
1365.84	2.18
1365.84	2.17
1365.84	2.15
1365.84	2.13
1365.85	2.1
1365.85	2.08
1365.85	2.04
1365.85	2.01
1365.85	1.98
1365.85	1.94
1365.85	1.91
1365.85	1.86
1365.85	1.83
1365.85	1.79
1365.86	1.75
1365.86	1.72
1365.86	1.68
1365.86	1.65
1365.86	1.62
1365.86	1.59
1365.86	1.56
1365.86	1.54
1365.86	1.51
1365.86	1.49
1365.87	1.48
1365.87	1.46
1365.87	1.44
1365.87	1.43
1365.87	1.4
1365.87	1.4
1365.87	1.39
1365.87	1.38
1365.87	1.36
1365.87	1.36
1365.88	1.36
1365.88	1.35
1365.88	1.34
1365.88	1.34
1365.88	1.35
1365.88	1.36
1365.88	1.37
1365.88	1.4
1365.88	1.41
1365.88	1.43
1365.88	1.45
1365.89	1.48
1365.89	1.5
1365.89	1.53
1365.89	1.55
1365.89	1.57
1365.89	1.59
1365.89	1.61
1365.89	1.63
1365.89	1.64
1365.89	1.65
1365.9	1.66
1365.9	1.66
1365.9	1.67
1365.9	1.67
1365.9	1.67
1365.9	1.67
1365.9	1.67
1365.9	1.67
1365.9	1.67
1365.9	1.66
1365.91	1.66
1365.91	1.65
1365.91	1.65
1365.91	1.64
1365.91	1.63
1365.91	1.63
1365.91	1.61
1365.91	1.6
1365.91	1.58
1365.91	1.57
1365.92	1.55
1365.92	1.53
1365.92	1.51
1365.92	1.5
1365.92	1.48
1365.92	1.46
1365.92	1.44
1365.92	1.42
1365.92	1.4
1365.92	1.39
1365.93	1.37
1365.93	1.37
1365.93	1.36
1365.93	1.36
1365.93	1.36
1365.93	1.37
1365.93	1.37
1365.93	1.37
1365.93	1.39
1365.93	1.39
1365.94	1.38
1365.94	1.39
1365.94	1.39
1365.94	1.4
1365.94	1.4
1365.94	1.41
1365.94	1.41
1365.94	1.4
1365.94	1.4
1365.94	1.41
1365.95	1.43
1365.95	1.46
1365.95	1.44
1365.95	1.45
1365.95	1.47
1365.95	1.49
1365.95	1.52
1365.95	1.55
1365.95	1.56
1365.95	1.6
1365.96	1.63
1365.96	1.66
1365.96	1.69
1365.96	1.7
1365.96	1.72
1365.96	1.73
1365.96	1.73
1365.96	1.74
1365.96	1.74
1365.96	1.74
1365.97	1.74
1365.97	1.73
1365.97	1.73
1365.97	1.73
1365.97	1.72
1365.97	1.71
1365.97	1.71
1365.97	1.71
1365.97	1.7
1365.97	1.69
1365.98	1.68
1365.98	1.67
1365.98	NaN
1365.98	NaN
1365.98	NaN
1365.98	NaN
1365.98	NaN
1365.98	NaN
1365.98	NaN
1365.98	NaN
1365.99	NaN
1365.99	NaN
1365.99	NaN
1365.99	NaN
1365.99	NaN
1365.99	NaN
1365.99	NaN
1365.99	NaN
1365.99	NaN
1365.99	NaN
1366	NaN
1366	NaN
1366	NaN
1366	NaN
1366	NaN
1366	NaN
1366	NaN
1366	NaN
1366	NaN
1366.01	NaN
1366.01	NaN
1366.01	NaN
1366.01	NaN
1366.01	NaN
1366.01	NaN
1366.01	NaN
1366.01	NaN
1366.01	NaN
1366.01	NaN
1366.02	NaN
1366.02	NaN
1366.02	NaN
1366.02	NaN
1366.02	NaN
1366.02	NaN
1366.02	NaN
1366.02	NaN
1366.02	NaN
1366.02	NaN
1366.03	NaN
1366.03	NaN
1366.03	NaN
1366.03	NaN
1366.03	NaN
1366.03	NaN
1366.03	NaN
1366.03	NaN
1366.03	NaN
1366.03	NaN
1366.04	NaN
1366.04	NaN
1366.04	NaN
1366.04	NaN
1366.04	1.64
1366.04	1.61
1366.04	1.58
1366.04	1.55
1366.04	1.51
1366.04	1.49
1366.05	1.46
1366.05	1.42
1366.05	1.39
1366.05	1.36
1366.05	1.33
1366.05	1.3
1366.05	1.28
1366.05	1.26
1366.05	1.24
1366.05	1.22
1366.06	1.21
1366.06	1.21
1366.06	1.2
1366.06	1.2
1366.06	1.2
1366.06	1.2
1366.06	1.21
1366.06	1.21
1366.06	1.22
1366.06	1.22
1366.07	1.23
1366.07	1.24
1366.07	1.25
1366.07	1.25
1366.07	1.27
1366.07	1.28
1366.07	1.29
1366.07	1.29
1366.07	1.32
1366.07	1.32
1366.08	1.33
1366.08	1.34
1366.08	1.35
1366.08	1.37
1366.08	1.4
1366.08	1.41
1366.08	1.43
1366.08	1.44
1366.08	1.46
1366.08	1.45
1366.09	1.47
1366.09	1.48
1366.09	1.47
1366.09	1.47
1366.09	1.47
1366.09	1.47
1366.09	1.46
1366.09	1.45
1366.09	1.44
1366.09	1.44
1366.1	1.43
1366.1	1.42
1366.1	1.41
1366.1	1.4
1366.1	1.39
1366.1	1.38
1366.1	1.38
1366.1	1.38
1366.1	1.37
1366.1	1.38
1366.11	1.37
1366.11	1.39
1366.11	1.39
1366.11	1.4
1366.11	1.42
1366.11	1.43
1366.11	1.46
1366.11	1.48
1366.11	1.51
1366.11	1.54
1366.12	1.58
1366.12	1.61
1366.12	1.64
1366.12	1.68
1366.12	1.74
1366.12	1.76
1366.12	1.8
1366.12	1.84
1366.12	1.88
1366.12	1.92
1366.12	1.95
1366.13	1.99
1366.13	2.03
1366.13	2.06
1366.13	2.09
1366.13	2.11
1366.13	2.12
1366.13	2.13
1366.13	2.14
1366.13	2.14
1366.13	2.13
1366.14	2.12
1366.14	2.12
1366.14	2.1
1366.14	2.08
1366.14	2.06
1366.14	2.04
1366.14	2.02
1366.14	1.99
1366.14	1.98
1366.14	1.97
1366.15	1.95
1366.15	1.93
1366.15	1.93
1366.15	1.92
1366.15	1.91
1366.15	1.91
1366.15	1.91
1366.15	1.92
1366.15	1.92
1366.15	1.94
1366.16	1.94
1366.16	1.96
1366.16	1.98
1366.16	1.99
1366.16	2.01
1366.16	2.01
1366.16	2
1366.16	2.03
1366.16	2.05
1366.16	2.07
1366.17	2.07
1366.17	2.09
1366.17	2.11
1366.17	2.13
1366.17	2.15
1366.17	2.16
1366.17	2.17
1366.17	2.19
1366.17	2.2
1366.17	2.2
1366.18	2.2
1366.18	2.21
1366.18	2.2
1366.18	2.2
1366.18	2.2
1366.18	2.18
1366.18	2.17
1366.18	2.16
1366.18	2.15
1366.18	2.14
1366.19	2.13
1366.19	2.11
1366.19	2.11
1366.19	2.09
1366.19	2.07
1366.19	2.06
1366.19	2.04
1366.19	2.03
1366.19	2.02
1366.19	2.01
1366.2	2.01
1366.2	2.01
1366.2	2
1366.2	2.01
1366.2	2.01
1366.2	2.02
1366.2	2.03
1366.2	2.03
1366.2	2.04
1366.2	2.05
1366.21	2.06
1366.21	2.07
1366.21	2.08
1366.21	2.08
1366.21	2.08
1366.21	2.09
1366.21	2.09
1366.21	2.08
1366.21	2.07
1366.21	2.06
1366.22	2.04
1366.22	2.03
1366.22	2
1366.22	1.98
1366.22	1.95
1366.22	1.92
1366.22	1.92
1366.22	1.87
1366.22	1.86
1366.22	1.84
1366.23	1.83
1366.23	1.81
1366.23	1.79
1366.23	1.77
1366.23	1.77
1366.23	1.76
1366.23	1.76
1366.23	1.76
1366.23	1.76
1366.23	1.75
1366.24	1.76
1366.24	1.75
1366.24	1.76
1366.24	1.75
1366.24	1.76
1366.24	1.75
1366.24	1.74
1366.24	1.74
1366.24	1.73
1366.24	1.72
1366.25	1.71
1366.25	1.7
1366.25	1.69
1366.25	1.69
1366.25	1.68
1366.25	1.68
1366.25	1.67
1366.25	1.68
1366.25	1.68
1366.26	1.68
1366.26	1.69
1366.26	1.69
1366.26	1.7
1366.26	1.72
1366.26	1.71
1366.26	1.73
1366.26	1.74
1366.26	1.76
1366.26	1.76
1366.27	1.78
1366.27	1.8
1366.27	1.8
1366.27	1.81
1366.27	1.82
1366.27	1.82
1366.27	1.82
1366.27	1.82
1366.27	1.81
1366.27	1.81
1366.28	1.8
1366.28	1.81
1366.28	1.8
1366.28	1.79
1366.28	1.79
1366.28	1.8
1366.28	1.79
1366.28	1.8
1366.28	1.79
1366.28	1.81
1366.29	1.81
1366.29	1.82
1366.29	1.84
1366.29	1.86
1366.29	1.86
1366.29	1.88
1366.29	1.88
1366.29	1.88
1366.29	1.88
1366.29	1.87
1366.3	1.86
1366.3	1.84
1366.3	1.82
1366.3	1.79
1366.3	1.77
1366.3	1.74
1366.3	1.72
1366.3	1.7
1366.3	1.68
1366.3	1.66
1366.31	1.64
1366.31	1.63
1366.31	1.63
1366.31	1.62
1366.31	1.62
1366.31	1.62
1366.31	1.62
1366.31	1.62
1366.31	1.63
1366.31	1.63
1366.32	1.64
1366.32	1.64
1366.32	1.65
1366.32	1.65
1366.32	1.66
1366.32	1.67
1366.32	1.66
1366.32	1.67
1366.32	1.67
1366.32	1.67
1366.33	1.66
1366.33	1.66
1366.33	1.66
1366.33	1.66
1366.33	1.66
1366.33	1.66
1366.33	1.66
1366.33	1.66
1366.33	1.67
1366.33	1.66
1366.34	1.67
1366.34	1.69
1366.34	1.7
1366.34	1.72
1366.34	1.74
1366.34	1.77
1366.34	1.8
1366.34	1.84
1366.34	1.88
1366.34	1.91
1366.35	1.97
1366.35	2.02
1366.35	2.06
1366.35	2.11
1366.35	2.16
1366.35	2.2
1366.35	2.24
1366.35	2.27
1366.35	2.29
1366.35	2.3
1366.36	2.3
1366.36	2.28
1366.36	2.27
1366.36	2.26
1366.36	2.24
1366.36	2.21
1366.36	2.18
1366.36	2.15
1366.36	2.13
1366.36	2.09
1366.37	2.05
1366.37	2.02
1366.37	1.99
1366.37	1.98
1366.37	1.93
1366.37	1.9
1366.37	1.87
1366.37	1.84
1366.37	1.81
1366.37	1.78
1366.38	1.75
1366.38	1.73
1366.38	1.7
1366.38	1.68
1366.38	1.65
1366.38	1.64
1366.38	1.63
1366.38	1.62
1366.38	1.62
1366.38	1.62
1366.38	1.63
1366.39	1.64
1366.39	1.66
1366.39	1.68
1366.39	1.69
1366.39	1.72
1366.39	1.76
1366.39	1.78
1366.39	1.81
1366.39	1.84
1366.39	1.86
1366.4	1.88
1366.4	1.9
1366.4	1.91
1366.4	1.92
1366.4	1.92
1366.4	1.92
1366.4	1.91
1366.4	1.9
1366.4	1.89
1366.4	1.87
1366.41	1.85
1366.41	1.83
1366.41	1.82
1366.41	1.79
1366.41	1.76
1366.41	1.73
1366.41	1.71
1366.41	1.69
1366.41	1.65
1366.41	1.63
1366.42	1.61
1366.42	1.57
1366.42	1.56
1366.42	1.54
1366.42	1.51
1366.42	1.51
1366.42	1.49
1366.42	1.48
1366.42	1.47
1366.42	1.46
1366.43	1.46
1366.43	1.44
1366.43	1.45
1366.43	1.44
1366.43	1.44
1366.43	1.45
1366.43	1.45
1366.43	1.47
1366.43	1.49
1366.43	1.5
1366.44	1.54
1366.44	1.58
1366.44	1.6
1366.44	1.65
1366.44	1.66
1366.44	1.7
1366.44	1.75
1366.44	1.76
1366.44	1.78
1366.44	1.81
1366.45	1.84
1366.45	1.86
1366.45	1.87
1366.45	1.89
1366.45	1.9
1366.45	1.91
1366.45	1.92
1366.45	1.93
1366.45	1.94
1366.45	1.94
1366.46	1.95
1366.46	1.95
1366.46	1.95
1366.46	1.95
1366.46	1.95
1366.46	1.95
1366.46	1.95
1366.46	1.95
1366.46	1.96
1366.46	1.95
1366.47	1.95
1366.47	1.95
1366.47	1.94
1366.47	1.94
1366.47	1.93
1366.47	1.93
1366.47	1.91
1366.47	1.89
1366.47	1.87
1366.47	1.85
1366.48	1.83
1366.48	1.8
1366.48	1.77
1366.48	1.73
1366.48	1.71
1366.48	1.68
1366.48	1.65
1366.48	1.63
1366.48	1.6
1366.48	1.58
1366.49	1.54
1366.49	1.53
1366.49	1.51
1366.49	1.5
1366.49	1.5
1366.49	1.5
1366.49	1.5
1366.49	1.52
1366.49	1.53
1366.49	1.56
1366.5	1.58
1366.5	1.6
1366.5	1.63
1366.5	1.65
1366.5	1.68
1366.5	1.7
1366.5	1.71
1366.5	1.72
1366.5	1.74
1366.51	1.75
1366.51	1.76
1366.51	1.77
1366.51	1.77
1366.51	1.77
1366.51	1.77
1366.51	1.77
1366.51	1.76
1366.51	1.76
1366.51	1.75
1366.52	1.74
1366.52	1.73
1366.52	1.72
1366.52	1.7
1366.52	1.68
1366.52	1.67
1366.52	1.65
1366.52	1.63
1366.52	1.62
1366.52	1.6
1366.53	1.6
1366.53	1.6
1366.53	1.6
1366.53	1.6
1366.53	1.61
1366.53	1.62
1366.53	1.64
1366.53	1.65
1366.53	1.66
1366.53	1.67
1366.54	1.69
1366.54	1.71
1366.54	1.72
1366.54	1.73
1366.54	1.74
1366.54	1.75
1366.54	1.77
1366.54	1.78
1366.54	1.79
1366.54	1.8
1366.55	1.8
1366.55	1.81
1366.55	1.81
1366.55	1.81
1366.55	1.81
1366.55	1.82
1366.55	1.81
1366.55	1.81
1366.55	1.8
1366.55	1.79
1366.56	1.79
1366.56	1.78
1366.56	1.77
1366.56	1.76
1366.56	1.75
1366.56	1.74
1366.56	1.73
1366.56	1.72
1366.56	1.71
1366.56	1.69
1366.57	1.67
1366.57	1.65
1366.57	1.64
1366.57	1.61
1366.57	1.6
1366.57	1.58
1366.57	1.56
1366.57	1.55
1366.57	1.54
1366.57	1.53
1366.58	1.52
1366.58	1.52
1366.58	1.53
1366.58	1.54
1366.58	1.55
1366.58	1.57
1366.58	1.61
1366.58	1.64
1366.58	1.68
1366.58	1.73
1366.59	1.78
1366.59	1.85
1366.59	1.91
1366.59	1.95
1366.59	2
1366.59	2.02
1366.59	2.04
1366.59	2.06
1366.59	2.08
1366.59	2.08
1366.6	2.08
1366.6	2.08
1366.6	2.08
1366.6	2.08
1366.6	2.07
1366.6	2.07
1366.6	2.07
1366.6	2.06
1366.6	2.07
1366.6	2.07
1366.61	2.08
1366.61	2.09
1366.61	2.1
1366.61	2.12
1366.61	2.14
1366.61	2.15
1366.61	2.17
1366.61	2.19
1366.61	2.2
1366.61	2.21
1366.62	2.22
1366.62	2.22
1366.62	2.22
1366.62	2.21
1366.62	2.2
1366.62	2.19
1366.62	2.18
1366.62	2.17
1366.62	2.15
1366.62	2.14
1366.62	2.13
1366.63	2.11
1366.63	2.1
1366.63	2.08
1366.63	2.07
1366.63	2.05
1366.63	2.03
1366.63	2.02
1366.63	2
1366.63	1.98
1366.63	1.97
1366.64	1.94
1366.64	1.92
1366.64	1.9
1366.64	1.87
1366.64	1.84
1366.64	1.81
1366.64	1.78
1366.64	1.75
1366.64	1.71
1366.64	1.66
1366.65	1.62
1366.65	1.59
1366.65	1.56
1366.65	1.54
1366.65	1.51
1366.65	1.48
1366.65	1.46
1366.65	1.43
1366.65	1.41
1366.65	1.38
1366.66	1.37
1366.66	1.35
1366.66	1.34
1366.66	1.34
1366.66	1.33
1366.66	1.33
1366.66	1.33
1366.66	1.34
1366.66	1.35
1366.66	1.36
1366.67	1.37
1366.67	1.4
1366.67	1.42
1366.67	1.46
1366.67	1.46
1366.67	1.47
1366.67	1.5
1366.67	1.51
1366.67	1.53
1366.67	1.54
1366.68	1.55
1366.68	1.56
1366.68	1.57
1366.68	1.57
1366.68	1.57
1366.68	1.57
1366.68	1.57
1366.68	1.56
1366.68	1.56
1366.68	1.55
1366.69	1.55
1366.69	1.55
1366.69	1.54
1366.69	1.54
1366.69	1.54
1366.69	1.53
1366.69	1.53
1366.69	1.53
1366.69	1.54
1366.69	1.53
1366.7	1.53
1366.7	1.54
1366.7	1.53
1366.7	1.52
1366.7	1.52
1366.7	1.51
1366.7	1.5
1366.7	1.5
1366.7	1.49
1366.7	1.47
1366.71	1.46
1366.71	1.45
1366.71	1.44
1366.71	1.42
1366.71	1.41
1366.71	1.39
1366.71	1.38
1366.71	1.36
1366.71	1.35
1366.71	1.33
1366.72	1.32
1366.72	1.31
1366.72	1.3
1366.72	1.29
1366.72	1.28
1366.72	1.27
1366.72	1.27
1366.72	1.26
1366.72	1.26
1366.72	1.26
1366.73	1.26
1366.73	1.27
1366.73	1.27
1366.73	1.28
1366.73	1.29
1366.73	1.3
1366.73	1.3
1366.73	1.32
1366.73	1.33
1366.73	1.34
1366.74	1.36
1366.74	1.38
1366.74	1.39
1366.74	1.42
1366.74	1.44
1366.74	1.46
1366.74	1.48
1366.74	1.5
1366.74	1.53
1366.74	1.55
1366.75	1.57
1366.75	1.59
1366.75	1.61
1366.75	1.62
1366.75	1.65
1366.75	1.66
1366.75	1.69
1366.75	1.71
1366.75	1.74
1366.76	1.77
1366.76	1.8
1366.76	1.83
1366.76	1.87
1366.76	1.92
1366.76	1.96
1366.76	2
1366.76	2.03
1366.76	2.06
1366.76	2.1
1366.77	2.12
1366.77	2.14
1366.77	2.15
1366.77	2.16
1366.77	2.15
1366.77	2.14
1366.77	2.12
1366.77	2.09
1366.77	2.06
1366.77	2.03
1366.78	1.99
1366.78	1.95
1366.78	1.9
1366.78	1.87
1366.78	1.83
1366.78	1.8
1366.78	1.78
1366.78	1.76
1366.78	1.75
1366.78	1.74
1366.79	1.75
1366.79	1.75
1366.79	1.76
1366.79	1.77
1366.79	1.79
1366.79	1.8
1366.79	1.81
1366.79	1.83
1366.79	1.84
1366.79	1.85
1366.8	1.85
1366.8	1.86
1366.8	1.86
1366.8	1.86
1366.8	1.87
1366.8	1.87
1366.8	1.88
1366.8	1.88
1366.8	1.89
1366.8	1.89
1366.81	1.9
1366.81	1.91
1366.81	1.91
1366.81	1.93
1366.81	1.94
1366.81	1.94
1366.81	1.96
1366.81	1.96
1366.81	1.98
1366.81	1.99
1366.82	2
1366.82	2.01
1366.82	2.01
1366.82	2.02
1366.82	2.01
1366.82	2.01
1366.82	2.01
1366.82	2
1366.82	1.99
1366.82	1.98
1366.83	1.97
1366.83	1.95
1366.83	1.93
1366.83	1.91
1366.83	1.88
1366.83	1.86
1366.83	1.82
1366.83	1.79
1366.83	1.76
1366.83	1.73
1366.84	1.69
1366.84	1.65
1366.84	1.62
1366.84	1.6
1366.84	1.58
1366.84	1.55
1366.84	1.52
1366.84	1.51
1366.84	1.49
1366.84	1.48
1366.85	1.47
1366.85	1.47
1366.85	1.46
1366.85	1.45
1366.85	1.44
1366.85	1.44
1366.85	1.44
1366.85	1.43
1366.85	1.43
1366.85	1.42
1366.86	1.42
1366.86	1.41
1366.86	1.41
1366.86	1.41
1366.86	1.4
1366.86	1.41
1366.86	1.41
1366.86	1.41
1366.86	1.42
1366.86	1.42
1366.87	1.43
1366.87	1.44
1366.87	1.45
1366.87	1.46
1366.87	1.47
1366.87	1.48
1366.87	1.49
1366.87	1.49
1366.87	1.49
1366.87	1.49
1366.88	1.49
1366.88	1.49
1366.88	1.49
1366.88	1.48
1366.88	1.48
1366.88	1.48
1366.88	1.48
1366.88	1.48
1366.88	1.48
1366.88	1.49
1366.88	1.5
1366.89	1.51
1366.89	1.52
1366.89	1.54
1366.89	1.55
1366.89	1.57
1366.89	1.6
1366.89	1.61
1366.89	1.63
1366.89	1.67
1366.89	1.69
1366.9	1.72
1366.9	1.75
1366.9	1.78
1366.9	1.81
1366.9	1.84
1366.9	1.87
1366.9	1.89
1366.9	1.91
1366.9	1.95
1366.9	1.96
1366.91	1.99
1366.91	2.01
1366.91	2.01
1366.91	2.04
1366.91	2.05
1366.91	2.05
1366.91	2.07
1366.91	2.08
1366.91	2.09
1366.91	2.1
1366.92	2.11
1366.92	2.11
1366.92	2.13
1366.92	2.13
1366.92	2.15
1366.92	2.16
1366.92	2.18
1366.92	2.19
1366.92	2.2
1366.92	2.22
1366.93	2.23
1366.93	2.25
1366.93	2.26
1366.93	2.26
1366.93	2.26
1366.93	2.25
1366.93	2.24
1366.93	2.22
1366.93	2.18
1366.93	2.14
1366.94	2.08
1366.94	2.05
1366.94	2.01
1366.94	1.96
1366.94	1.88
1366.94	1.82
1366.94	1.76
1366.94	1.71
1366.94	1.66
1366.94	1.6
1366.95	1.56
1366.95	1.51
1366.95	1.48
1366.95	1.45
1366.95	1.42
1366.95	1.39
1366.95	1.38
1366.95	1.36
1366.95	1.35
1366.95	1.35
1366.96	1.33
1366.96	1.33
1366.96	1.32
1366.96	1.31
1366.96	1.3
1366.96	1.29
1366.96	1.28
1366.96	1.26
1366.96	1.25
1366.96	1.24
1366.97	1.22
1366.97	1.21
1366.97	1.19
1366.97	1.17
1366.97	1.17
1366.97	1.16
1366.97	1.14
1366.97	1.14
1366.97	1.14
1366.97	1.14
1366.98	1.14
1366.98	1.14
1366.98	1.14
1366.98	1.14
1366.98	1.14
1366.98	NaN
1366.98	NaN
1366.98	NaN
1366.98	NaN
1366.98	NaN
1366.99	NaN
1366.99	NaN
1366.99	NaN
1366.99	NaN
1366.99	NaN
1366.99	NaN
1366.99	NaN
1366.99	NaN
1366.99	NaN
1366.99	NaN
1367	NaN
1367	NaN
1367	NaN
[truncated: 18,002 more rows]

## Sheet: Sulfate
% Depth(m)	Sulfate(ug/l)
1365.02	105.144
1365.03	109.657
1365.05	134.029
1365.07	161.686
1365.09	232.152
1365.1	269.232
1365.12	244.819
1365.14	174.461
1365.16	134.767
1365.18	110.172
1365.19	108.56
1365.21	106.917
1365.23	113.636
1365.25	108.029
1365.26	125.033
1365.28	135.559
1365.3	155.05
1365.32	153.657
1365.33	152.988
1365.35	136.2
1365.37	114.869
1365.39	88.6441
1365.41	98.1286
1365.42	99.1514
1365.44	103.727
1365.46	103.342
1365.48	115.891
1365.49	130.065
1365.51	145.468
1365.53	134.617
1365.55	130.629
1365.57	113.655
1365.59	119.669
1365.61	116.526
1365.62	126.456
1365.64	112.562
1365.66	119.448
1365.68	114.547
1365.69	132.46
1365.71	143.789
1365.73	155.236
1365.75	167.971
1365.76	179.768
1365.78	164.404
1365.8	166.297
1365.82	148.631
1365.84	138.588
1365.85	114.114
1365.87	125.047
1365.89	115.345
1365.91	97.5473
1365.92	85.0975
1365.94	102.919
1365.96	123.144
1365.98	111.343
1366.02	102.631
1366.03	112.228
1366.05	99.0843
1366.07	87.417
1366.08	87.9238
1366.1	89.3644
1366.12	94.7095
1366.13	127.668
1366.15	120.744
1366.17	122.212
1366.18	117.003
1366.2	131.888
1366.22	125.899
1366.23	123.474
1366.25	112.459
1366.26	112.018
1366.28	102.107
1366.3	105.68
1366.31	102.512
1366.33	112.682
1366.35	130.748
1366.36	142.32
1366.38	127.166
1366.4	158.864
1366.41	140.993
1366.43	137.083
1366.45	145.499
1366.46	148.162
1366.48	123.145
1366.5	132.5
1366.51	140.371
1366.53	146.878
1366.55	142.911
1366.56	146.806
1366.58	134.602
1366.6	150.46
1366.61	148.675
1366.63	158.14
1366.65	127.735
1366.66	116.665
1366.68	134.593
1366.7	136.24
1366.71	116.632
1366.73	108.43
1366.75	112.05
1366.76	132.541
1366.78	137.207
1366.79	154.129
1366.81	150.385
1366.83	144.416
1366.84	117.616
1366.86	111.097
1366.88	91.4843
1366.89	96.3656
1366.91	110.002
1366.93	126.854
1366.94	113.758
1366.96	95.7054
1366.98	78.1387
1367.02	117.978
1367.04	129.099
1367.06	130.815
1367.08	134.782
1367.09	151.939
1367.11	150.968
1367.13	114.844
1367.14	110.845
1367.16	108.132
1367.18	123.551
1367.2	154.268
1367.21	147.602
1367.23	123.668
1367.25	112.891
1367.27	111.421
1367.28	146.436
1367.3	151.368
1367.32	138.665
1367.34	134.183
1367.35	124.352
1367.37	114.761
1367.39	129.513
1367.41	133.881
1367.42	138.929
1367.44	136.466
1367.46	144.983
1367.48	141.179
1367.49	128.158
1367.51	135.069
1367.53	150.414
1367.55	156.384
1367.56	140.076
1367.58	109.928
1367.6	112.738
1367.62	121.307
1367.63	122.273
1367.65	128.427
1367.67	136.409
1367.69	126.665
1367.7	128.901
1367.72	130.867
1367.74	137.864
1367.76	119.881
1367.77	113.153
1367.79	154.321
1367.81	235.648
1367.83	271.83
1367.84	249.145
1367.86	187.485
1367.88	166.799
1367.9	156.515
1367.91	145.827
1367.93	121.824
1367.95	105.87
1367.97	96.4867
1367.98	117.099
1368.02	107.526
1368.03	108.04
1368.05	113.931
1368.07	132.875
1368.08	119.455
1368.1	118.069
1368.12	89.7355
1368.14	74.5899
1368.15	74.731
1368.17	94.8271
1368.19	96.5193
1368.21	128.047
1368.22	186.646
1368.24	254.912
1368.26	269.668
1368.27	226.631
1368.29	180.613
1368.31	159.627
1368.33	141.381
1368.34	156.421
1368.36	157.709
1368.38	190.724
1368.4	200.722
1368.41	205.246
1368.43	175.517
1368.45	151.149
1368.46	141.303
1368.48	169.321
1368.5	201.837
1368.52	187.032
1368.53	150.674
1368.55	144.765
1368.57	146.534
1368.58	152.767
1368.6	140.248
1368.62	120.583
1368.64	99.3335
1368.65	103.359
1368.67	107.635
1368.69	117.497
1368.71	112.337
1368.72	118.341
1368.74	121.644
1368.76	124.213
1368.78	109.329
1368.8	118.195
1368.81	128.359
1368.83	143.062
1368.85	128.167
1368.86	122.404
1368.88	116.083
1368.9	142.613
1368.92	155.832
1368.93	142.402
1368.95	153.21
1368.97	162.755
1368.99	143.315
1369.01	123.005
1369.03	161.828
1369.05	169.853
1369.07	157.024
1369.08	143.848
1369.1	141.386
1369.12	127.813
1369.14	105.073
1369.15	93.2455
1369.17	104.827
1369.19	103.917
1369.2	109.573
1369.22	106.892
1369.24	118.536
1369.26	127.681
1369.27	145.896
1369.29	148.867
1369.31	156.626
1369.33	146.614
1369.34	150.269
1369.36	142.531
1369.38	131.119
1369.4	128.335
1369.42	120.897
1369.43	90.862
1369.45	88.4121
1369.47	105.173
1369.48	118.282
1369.5	127.176
1369.52	181.451
1369.54	211.513
1369.55	206.497
1369.57	167.372
1369.59	153.638
1369.61	135.801
1369.62	139.863
1369.64	126.314
1369.66	115.936
1369.67	116.516
1369.69	127.827
1369.72	118.243
1369.74	111.491
1369.76	113.195
1369.77	110.7
1369.79	96.1038
1369.81	107.171
1369.83	102.531
1369.84	96.7486
1369.86	106.071
1369.88	109.036
1369.89	96.3546
1369.91	96.6431
1369.93	99.9634
1369.95	108.394
1369.96	98.5893
1369.98	97.5325
1370.02	93.0555
1370.04	125.584
1370.05	125.907
1370.07	116.491
1370.08	118.343
1370.1	135.059
1370.12	126.032
1370.13	130.416
1370.15	121.208
1370.17	118.748
1370.18	112.948
1370.2	112.494
1370.21	111.655
1370.23	154.143
1370.25	184.298
1370.26	167.616
1370.28	129.888
1370.29	136.051
1370.31	138.712
1370.33	138.336
1370.34	121.498
1370.36	132.241
1370.37	181.68
1370.39	235.28
1370.41	233.481
1370.42	194.461
1370.44	151.097
1370.45	164.062
1370.47	152.196
1370.49	134.697
1370.5	111.973
1370.52	104.446
1370.53	79.3112
1370.55	82.8231
1370.57	105.309
1370.58	121.814
1370.6	123.095
1370.61	158.375
1370.63	155.022
1370.65	148.913
1370.66	142.179
1370.68	126.931
1370.69	135.618
1370.71	145.051
1370.73	139.152
1370.74	130.973
1370.76	107.65
1370.77	134.105
1370.79	139.317
1370.81	138.724
1370.82	157.026
1370.84	169.518
1370.85	158.804
1370.87	143.555
1370.89	123.952
1370.9	152.629
1370.92	155.058
1370.93	163.386
1370.95	166.889
1370.97	171.098
1370.98	137.883
1371.02	100.744
1371.04	105.809
1371.05	125.105
1371.07	114.533
1371.09	111.424
1371.11	119.319
1371.12	135.164
1371.14	140.976
1371.16	121.675
1371.18	118.53
1371.19	138.713
1371.21	139.197
1371.23	133.927
1371.25	113.98
1371.26	96.9344
1371.28	84.0765
1371.3	103.935
1371.32	138.716
1371.33	171.237
1371.35	148.787
1371.37	133.409
1371.39	120.427
1371.4	111.066
1371.42	101.589
1371.44	102.246
1371.46	95.9994
1371.47	90.7566
1371.49	96.7615
1371.51	127.262
1371.53	129.741
1371.54	112.251
1371.56	103.387
1371.58	102.335
1371.6	100.863
1371.61	112.93
1371.63	107.932
1371.65	106.313
1371.67	107.039
1371.68	123.776
1371.7	119.405
1371.72	126.157
1371.74	114.321
1371.75	103.937
1371.77	100.962
1371.79	124.446
1371.81	130.346
1371.82	139.301
1371.84	119.077
1371.86	123.084
1371.88	131.683
1371.9	126.262
1371.91	118.612
1371.93	108.894
1371.95	104.717
1371.97	119.965
1371.98	112.234
1372.03	112.544
1372.05	127.13
1372.06	123.141
1372.08	139.394
1372.1	156.484
1372.11	168.919
1372.13	160.533
1372.15	129.606
1372.16	112.556
1372.18	121.269
1372.2	120.752
1372.22	123.557
1372.23	115.291
1372.25	114.667
1372.27	109.923
1372.28	97.9387
1372.3	96.8116
1372.32	107.865
1372.34	91.0933
1372.35	91.8573
1372.37	93.3423
1372.39	104.824
1372.4	107.762
1372.42	107.018
1372.44	89.6117
1372.45	96.6037
1372.47	126.317
1372.49	171.623
1372.51	206.11
1372.52	196.602
1372.54	172.597
1372.56	228.023
1372.57	258.356
1372.59	280.815
1372.61	214.514
1372.62	162.924
1372.64	127.183
1372.66	300.636
1372.68	469.842
1372.69	547.287
1372.71	590.08
1372.73	476.692
1372.74	298.209
1372.76	237.664
1372.78	190.929
1372.79	164.6
1372.81	136.962
1372.83	140.479
1372.85	133.154
1372.86	135.145
1372.88	133.373
1372.9	140.613
1372.91	104.469
1372.93	99.2133
1372.95	103.935
1372.96	122.37
1372.98	112.024
1373.02	101.494
1373.03	114.27
1373.05	122.924
1373.07	124.069
1373.08	131.751
1373.1	144.151
1373.12	182.018
1373.13	184.612
1373.15	156.219
1373.17	133.982
1373.19	137.471
1373.2	123.613
1373.22	125.584
1373.24	155.005
1373.25	218.321
1373.27	205.09
1373.29	179.626
1373.3	149.67
1373.32	129.74
1373.34	111.213
1373.35	119.614
1373.37	114.568
1373.39	114.334
1373.4	95.0897
1373.42	87.2104
1373.44	85.5112
1373.46	108.425
1373.47	118.349
1373.49	121.565
1373.51	118.628
1373.52	118.91
1373.54	108.157
1373.56	110.81
1373.57	115.035
1373.59	108.715
1373.61	118.43
1373.62	123.999
1373.64	119.234
1373.66	107.279
1373.67	107.913
1373.69	107.571
1373.71	99.8675
1373.73	123.369
1373.74	113.454
1373.76	92.2774
1373.78	74.1363
1373.79	94.0217
1373.81	94.6604
1373.83	97.4232
1373.84	106.276
1373.86	91.9144
1373.88	75.7913
1373.89	95.7163
1373.91	92.4607
1373.93	90.2495
1373.94	96.4191
1373.96	110.024
1373.98	107.149
1374.01	80.4278
1374.03	95.4776
1374.05	78.4983
1374.06	65.7847
1374.08	71.2519
1374.1	90.6971
1374.11	113.325
1374.13	121.157
1374.15	109.866
1374.16	120.354
1374.18	124.132
1374.2	118.202
1374.21	98.1723
1374.23	88.1537
1374.25	110.708
1374.26	127.104
1374.28	117.352
1374.3	115.791
1374.31	126.186
1374.33	167.773
1374.35	161.66
1374.36	148.477
1374.38	135.282
1374.4	128.414
1374.41	107.883
1374.43	103.845
1374.45	106.046
1374.46	134.845
1374.48	132.589
1374.5	126.958
1374.51	113.611
1374.53	116.078
1374.55	111.534
1374.56	121.356
1374.58	114.804
1374.6	124.434
1374.61	132.163
1374.63	128.459
1374.65	111.924
1374.66	114.402
1374.68	107.324
1374.7	113.54
1374.71	108.256
1374.73	101.636
1374.75	96.0249
1374.76	115.247
1374.78	126.591
1374.8	127.38
1374.81	112.558
1374.83	110.607
1374.85	90.8005
1374.86	85.0697
1374.88	85.3629
1374.9	83.3592
1374.92	91.7133
1374.94	106.385
1374.95	102.133
1374.97	114.785
1374.99	139.756
1375.02	128.247
1375.04	140.499
1375.05	140.793
1375.07	138.475
1375.09	161.36
1375.1	272.142
1375.12	566.247
1375.14	1028
1375.15	833.959
1375.17	473.799
1375.19	278.399
1375.2	187.873
1375.22	149.612
1375.24	114.996
1375.25	109.683
1375.27	89.8719
1375.29	99.0127
1375.3	94.5775
1375.32	133.253
1375.34	156.533
1375.35	154.417
1375.37	125.354
1375.39	110.179
1375.4	136.898
1375.42	157.707
1375.44	125.449
1375.45	123.84
1375.47	129.339
1375.49	111.337
1375.51	110.647
1375.52	124.981
1375.54	121.861
1375.56	135.256
1375.57	134.189
1375.59	116.997
1375.61	97.929
1375.62	89.0495
1375.64	91.8968
1375.66	102.443
1375.67	100.786
1375.69	97.4823
1375.71	88.6708
1375.72	104.874
1375.74	116.388
1375.76	123.323
1375.77	95.0826
1375.79	86.8267
1375.81	93.2825
1375.82	98.9768
1375.84	94.7295
1375.86	99.1639
1375.87	84.6155
1375.89	92.5635
1375.91	104.894
1375.92	117.747
1375.94	149.841
1375.96	181.57
1375.97	167.108
1375.99	147.623
1376.03	56.3381
1376.04	68.7315
1376.06	83.2666
1376.08	115.896
1376.1	134.741
1376.11	117.55
1376.13	110.751
1376.15	98.828
1376.17	90.9563
1376.18	80.8794
1376.2	93.7302
1376.22	100.281
1376.23	105.138
1376.25	105.512
1376.27	109.872
1376.29	112.217
1376.3	118.314
1376.32	109.806
1376.34	110.924
1376.36	102.764
1376.37	91.8207
1376.39	103.558
1376.41	136.177
1376.43	140.572
1376.44	146.106
1376.46	122.48
1376.48	112.752
1376.5	107.546
1376.51	107.09
1376.53	112.445
1376.55	120.673
1376.57	111.149
1376.58	110.439
1376.6	97.6219
1376.62	111.625
1376.64	109.27
1376.65	109.554
1376.67	113.172
1376.69	120.946
1376.71	116.633
1376.72	114.897
1376.74	102.97
1376.76	113.181
1376.78	113.508
1376.79	125.377
1376.81	123.067
1376.83	139.13
1376.85	157.614
1376.86	214.614
1376.88	271.307
1376.9	365.98
1376.92	355.638
1376.93	296.966
1376.95	206.863
1376.97	168.88
1376.99	135.673
1377.02	88.0583
1377.03	103.982
1377.05	99.8407
1377.07	106.889
1377.09	115.364
1377.1	116.627
1377.12	112.683
1377.14	122.614
1377.15	122.36
1377.17	111.813
1377.19	100.185
1377.2	118.177
1377.22	123.446
1377.24	130.884
1377.26	124.374
1377.27	115.812
1377.29	118.138
1377.31	116.802
1377.32	115.535
1377.34	125.72
1377.36	112.088
1377.37	103.784
1377.39	88.0442
1377.41	96.1442
1377.43	104.656
1377.44	105.619
1377.46	104.687
1377.48	114.149
1377.49	109.757
1377.51	119.22
1377.53	115.125
1377.54	131.439
1377.56	130.772
1377.58	124.632
1377.6	124.856
1377.61	135.74
1377.63	118.373
1377.65	113.751
1377.66	108.301
1377.68	99.9349
1377.7	87.3008
1377.72	97.1635
1377.73	105.192
1377.75	113.103
1377.77	108.42
1377.78	116.928
1377.81	110.72
1377.83	115.174
1377.85	121.487
1377.87	149.738
1377.88	148.68
1377.9	136.503
1377.92	147.598
1377.93	149.512
1377.95	127.149
1377.97	129.743
1377.98	109.853
1378.02	114.052
1378.04	121.515
1378.05	112.258
1378.07	111.341
1378.09	119.819
1378.1	125.45
1378.12	115.811
1378.14	112.687
1378.15	114.706
1378.17	113.651
1378.19	112.523
1378.21	115.804
1378.22	104.237
1378.24	97.1751
1378.26	86.2245
1378.27	102.868
1378.29	95.6942
1378.31	90.6782
1378.32	95.7908
1378.34	111.268
1378.36	134.462
1378.37	152.441
1378.39	146.604
1378.41	163.096
1378.43	162.998
1378.44	150.716
1378.46	144.682
1378.48	150.207
1378.49	119.384
1378.51	104.979
1378.53	105.461
1378.54	115.201
1378.56	122.327
1378.58	142.24
1378.59	130.515
1378.61	127.12
1378.63	120.08
1378.65	99.4669
1378.66	106.323
1378.68	116.922
1378.7	164.482
1378.71	256.728
1378.73	213.129
1378.75	167.472
1378.76	137.386
1378.78	127.515
1378.8	123.278
1378.82	135.651
1378.83	158.513
1378.85	183.126
1378.87	174.949
1378.88	159.448
1378.9	142.104
1378.92	138.482
1378.93	142.171
1378.95	156.535
1378.97	138.24
1378.98	123.439
1379.02	73.7743
1379.03	81.7287
1379.05	99.2823
1379.07	122.258
1379.09	106.653
1379.11	94.3871
1379.13	86.2041
1379.14	105.165
1379.16	106.956
1379.18	94.2318
1379.2	88.7395
1379.22	99.2042
1379.23	116.757
1379.25	116.207
1379.27	109.238
1379.29	116.296
1379.31	115.542
1379.33	104.188
1379.34	93.3667
1379.36	121.654
1379.38	129.183
1379.4	121.695
1379.42	126.887
1379.43	131.698
1379.45	148.966
1379.47	169.095
1379.49	172.425
1379.51	166.743
1379.52	136.538
1379.54	130.894
1379.56	120.731
1379.58	127.218
1379.6	109.36
1379.62	109.143
1379.63	110.669
1379.65	148.452
1379.67	177.426
1379.69	178.636
1379.71	151.311
1379.72	140.315
1379.74	115.678
1379.76	121.126
1379.78	106.268
1379.8	102.275
1379.82	105.047
1379.83	113.251
1379.85	98.7926
1379.87	102.444
1379.89	118.128
1379.91	114.423
1379.92	92.5187
1379.94	89.6271
1379.96	98.197
1379.98	111.158
1380.02	110.589
1380.03	134.248
1380.05	130.345
1380.07	179.465
1380.09	204.489
1380.1	191.013
1380.12	166.231
1380.14	147.89
1380.16	139.084
1380.17	158.373
1380.19	158.942
1380.21	147.389
1380.23	126.55
1380.24	127.396
1380.26	126.143
1380.28	138.747
1380.3	132.6
1380.31	126.429
1380.33	116.32
1380.35	116.917
1380.37	110.381
1380.38	113.643
1380.4	115.123
1380.42	130.436
1380.44	118.667
1380.45	126.678
1380.47	118.507
1380.49	112.915
1380.51	104.71
1380.52	98.8404
1380.54	103.205
1380.56	101.535
1380.58	101.682
1380.59	123.688
1380.61	123.396
1380.63	146.355
1380.65	173.22
1380.66	155.955
1380.68	111.038
1380.7	115.625
1380.72	122.361
1380.73	133.12
1380.75	152.144
1380.77	163.896
1380.79	151.881
1380.81	128.329
1380.83	107.252
1380.85	106.347
1380.86	146.45
1380.88	166.755
1380.9	150.774
1380.92	151.501
1380.93	137.226
1380.95	141.212
1380.97	148.692
1380.99	133.921
1381.01	120.939
1381.03	134.22
1381.04	143.281
1381.06	115.88
1381.08	101.018
1381.09	98.4902
1381.11	111.486
1381.13	121.664
1381.14	125.931
1381.16	115.499
1381.18	118.974
1381.19	118.441
1381.21	118.509
1381.23	119.771
1381.25	121.572
1381.26	109.059
1381.28	120.316
1381.3	107.15
1381.31	101.761
1381.33	106.057
1381.35	126.914
1381.36	130.183
1381.38	135.066
1381.4	122.089
1381.42	118.817
1381.43	110.684
1381.45	109.735
1381.47	101.448
1381.48	110.06
1381.5	122.566
1381.52	124.573
1381.53	128.193
1381.55	122.842
1381.57	113.089
1381.58	128.489
1381.6	120.49
1381.62	120.376
1381.64	112.421
1381.65	114.828
1381.67	109.761
1381.69	125.206
1381.7	141.401
1381.72	150.885
1381.74	132.773
1381.75	126.377
1381.77	103.818
1381.79	107.926
1381.81	107.963
1381.82	109.572
1381.84	106.159
1381.86	112.099
1381.87	121.939
1381.89	141.657
1381.91	144.88
1381.92	148.066
1381.94	131.471
1381.96	149.942
1381.97	156.606
1381.99	138.449
1382.01	97.3179
1382.03	128.087
1382.05	126.535
1382.07	121.492
1382.09	117.1
1382.11	122.339
1382.12	128.536
1382.14	131.78
1382.16	115.784
1382.18	121.005
1382.2	142.089
1382.22	153.061
1382.23	132.74
1382.25	120.895
1382.27	152.051
1382.29	203.399
1382.31	200.598
1382.32	180.842
1382.34	152.417
1382.36	127.748
1382.38	104.661
1382.4	113.039
1382.42	108.284
1382.43	117.572
1382.45	109.026
1382.47	96.7025
1382.49	93.6271
1382.51	104.13
1382.53	106.867
1382.54	141.575
1382.56	167.48
1382.58	150.779
1382.6	130.491
1382.62	132.556
1382.64	119.093
1382.65	113.39
1382.67	113.693
1382.69	130.103
1382.71	130.801
1382.73	121.248
1382.74	101.815
1382.76	109.706
1382.78	110.129
1382.8	119.697
1382.82	116.171
1382.84	122.088
1382.85	123.866
1382.87	114.305
1382.89	89.6536
1382.91	89.4318
1382.93	79.5233
1382.95	85.8329
1382.96	105.73
1382.98	110.87
1383.02	98.5764
1383.04	106.357
1383.05	121.412
1383.07	104.191
1383.09	101.7
1383.11	104.91
1383.12	105.854
1383.14	136.038
1383.16	158.523
1383.17	146.92
1383.19	135.127
1383.21	115.724
1383.23	100.832
1383.24	112.026
1383.26	117.233
1383.28	112.246
1383.29	114.517
1383.31	108.633
1383.33	125.067
1383.35	115.457
1383.36	100.468
1383.38	94.8322
1383.4	119.45
1383.42	136.523
1383.43	145.756
1383.45	138.305
1383.47	127.109
1383.48	103.512
1383.5	117.896
1383.52	122.2
1383.54	135.241
1383.55	156.36
1383.57	155.476
1383.59	122.614
1383.61	119.813
1383.62	116.305
1383.64	109.758
1383.66	116.826
1383.67	150.228
1383.72	143.137
1383.74	134.078
1383.76	126.692
1383.77	107.603
1383.79	99.7702
1383.81	120.452
1383.83	158.192
1383.84	158.769
1383.86	118.743
1383.88	106.159
1383.89	95.7711
1383.91	92.1866
1383.93	77.9966
1383.95	98.9451
1383.96	130.826
1383.98	133.066
1384.02	98.5005
1384.03	103.363
1384.05	128.691
1384.07	134.853
1384.09	122.856
1384.1	101.336
1384.12	126.356
1384.14	152.425
1384.16	164.027
1384.18	136.246
1384.19	131.966
1384.21	159.18
1384.23	209.759
1384.25	200.929
1384.27	189.392
1384.28	153.681
1384.3	128.273
1384.32	130.718
1384.34	138.521
1384.36	126.927
1384.37	131.676
1384.39	124.041
1384.41	128.417
1384.43	126.859
1384.45	108.729
1384.46	105.275
1384.48	121.357
1384.5	141.173
1384.52	180.78
1384.54	158.094
1384.55	142.713
1384.57	147.122
1384.59	178.159
1384.61	161.584
1384.62	132.761
1384.64	122.237
1384.66	139.802
1384.68	152.559
1384.7	162.696
1384.71	140.317
1384.73	140.612
1384.75	118.383
1384.77	121.312
1384.79	136.117
1384.8	142.073
1384.82	154.57
1384.84	160.877
1384.86	134.456
1384.88	110.455
1384.89	117.593
1384.91	159.466
1384.93	198.893
1384.95	184.613
1384.97	149.081
1384.98	143.764

## Sheet: ECM
%Depth(m)	ECM(arb.unit)
1365	35.725
1365.01	35.193
1365.02	32.907
1365.03	32.056
1365.04	27.744
1365.05	30.5
1365.06	32.288
1365.07	29.25
1365.08	33.318
1365.09	38.006
1365.1	39.289
1365.11	40.928
1365.12	42.903
1365.13	42.727
1365.14	41.995
1365.15	38.815
1365.16	36.002
1365.17	33.14
1365.18	32.305
1365.19	35.147
1365.2	37.099
1365.21	34.163
1365.22	26.763
1365.23	23.062
1365.24	31.975
1365.25	37.048
1365.26	36.904
1365.27	36.544
1365.28	34.117
1365.29	30.17
1365.3	30.385
1365.31	32.723
1365.32	29.352
1365.33	31.778
1365.34	31.457
1365.35	32.015
1365.36	32.089
1365.37	29.532
1365.38	30.315
1365.39	29.227
1365.4	32.626
1365.41	32.48
1365.42	28.917
1365.43	32.917
1365.44	32.733
1365.45	31.992
1365.46	30.755
1365.47	30
1365.48	28.678
1365.49	32.405
1365.5	36.107
1365.51	34.022
1365.52	26.179
1365.53	23.412
1365.54	27.537
1365.55	33.529
1365.56	34.47
1365.57	33.948
1365.58	33.172
1365.59	28.473
1365.6	32.355
1365.61	34.626
1365.62	35.016
1365.63	35.816
1365.64	29.2
1365.65	28.985
1365.66	29.643
1365.67	30.014
1365.68	31.698
1365.69	29.623
1365.7	30.13
1365.71	32.276
1365.72	31.708
1365.73	31.572
1365.74	32.588
1365.75	31.716
1365.76	36.268
1365.77	34.056
1365.78	32.861
1365.79	33.673
1365.8	33.796
1365.81	32.421
1365.82	31.209
1365.83	27.561
1365.84	23.645
1365.85	27.863
1365.86	33.465
1365.87	36.973
1365.88	36.549
1365.89	31.297
1365.9	33.938
1365.91	36.19
1365.92	40.186
1365.93	38.742
1365.94	38.678
1365.95	36.926
1365.96	31.054
1365.97	34.362
1365.98	37.855
1365.99	NaN
1366	25.962
1366.01	25.696
1366.02	22.975
1366.03	22.702
1366.04	27.919
1366.05	29.621
1366.06	31.833
1366.07	31.411
1366.08	30.08
1366.09	29.13
1366.1	27.913
1366.11	31.682
1366.12	32.425
1366.13	28.563
1366.14	25.746
1366.15	27.665
1366.16	29.819
1366.17	26.182
1366.18	23.013
1366.19	23.437
1366.2	27.223
1366.21	28.462
1366.22	28.428
1366.23	30.963
1366.24	30.39
1366.25	28.643
1366.26	31.678
1366.27	31.183
1366.28	28.35
1366.29	28.083
1366.3	27.192
1366.31	31.124
1366.32	30.587
1366.33	28.842
1366.34	29.117
1366.35	26.837
1366.36	22.924
1366.37	26.349
1366.38	31.285
1366.39	32.674
1366.4	27.715
1366.41	27.56
1366.42	30.455
1366.43	31.839
1366.44	32.152
1366.45	31.123
1366.46	28.693
1366.47	26.401
1366.48	27.329
1366.49	31.569
1366.5	31.697
1366.51	28.928
1366.52	29.039
1366.53	29.16
1366.54	27.479
1366.55	25.02
1366.56	25.341
1366.57	27.527
1366.58	29.813
1366.59	30.039
1366.6	30.194
1366.61	27.545
1366.62	21.925
1366.63	23.062
1366.64	25.787
1366.65	29.875
1366.66	31.154
1366.67	30.207
1366.68	29.092
1366.69	30.194
1366.7	28.246
1366.71	27.609
1366.72	28.785
1366.73	28.527
1366.74	29.176
1366.75	28.563
1366.76	25.933
1366.77	22.283
1366.78	28.74
1366.79	30.273
1366.8	27.459
1366.81	29.209
1366.82	26.091
1366.83	25.817
1366.84	31.067
1366.85	32.292
1366.86	31.329
1366.87	30.141
1366.88	30.316
1366.89	32.058
1366.9	28.743
1366.91	25.606
1366.92	23.841
1366.93	22.353
1366.94	27.049
1366.95	33.355
1366.96	30.494
1366.97	30.063
1366.98	29.328
1366.99	27.863
1367	28.88
1367.01	30.183
1367.02	30.724
1367.03	28.312
1367.04	27.473
1367.05	26.028
1367.06	28.182
1367.07	26.643
1367.08	23.718
1367.09	23.642
1367.1	24.047
1367.11	25.947
1367.12	26.162
1367.13	27.219
1367.14	29.512
1367.15	29.859
1367.16	29.979
1367.17	25.064
1367.18	25.013
1367.19	27.836
1367.2	29.306
1367.21	28.293
1367.22	22.648
1367.23	22.222
1367.24	29.473
1367.25	31.349
1367.26	28.531
1367.27	26.013
1367.28	29.936
1367.29	29.281
1367.3	29.344
1367.31	27.159
1367.32	23.238
1367.33	22.717
1367.34	27.114
1367.35	28.227
1367.36	22.972
1367.37	19.694
1367.38	21.18
1367.39	21.724
1367.4	22.137
1367.41	21.91
1367.42	24.086
1367.43	23.216
1367.44	22.585
1367.45	23.615
1367.46	24.898
1367.47	26.382
1367.48	25.352
1367.49	22.664
1367.5	23.492
1367.51	28.094
1367.52	29.245
1367.53	26.72
1367.54	25.909
1367.55	27.29
1367.56	28.477
1367.57	28.759
1367.58	29.569
1367.59	29.404
1367.6	26.643
1367.61	25.23
1367.62	26.956
1367.63	21.778
1367.64	20.594
1367.65	28.408
1367.66	28.301
1367.67	23.49
1367.68	26.261
1367.69	24.728
1367.7	26.694
1367.71	29.302
1367.72	27.742
1367.73	26.004
1367.74	24.21
1367.75	23.989
1367.76	23.885
1367.77	25.502
1367.78	25.928
1367.79	25.392
1367.8	22.648
1367.81	22.647
1367.82	26.286
1367.83	28.017
1367.84	27.363
1367.85	22.337
1367.86	22.373
1367.87	28.075
1367.88	28.83
1367.89	21.705
1367.9	16.395
1367.91	21.672
1367.92	28.7
1367.93	28.072
1367.94	21.812
1367.95	22.836
1367.96	28.661
1367.97	29.549
1367.98	27.207
1367.99	23.77
1368	24.577
1368.01	27.743
1368.02	30.548
1368.03	34.339
1368.04	37.49
1368.05	34.444
1368.06	19.444
1368.07	18.988
1368.08	23.019
1368.09	34.851
1368.1	39.43
1368.11	38.979
1368.12	39.362
1368.13	38.421
1368.14	37.678
1368.15	41.265
1368.16	41.809
1368.17	32.837
1368.18	27.685
1368.19	30.283
1368.2	40.228
1368.21	42.759
1368.22	38.918
1368.23	43.856
1368.24	53.888
1368.25	55.632
1368.26	45.084
1368.27	35.724
1368.28	34.916
1368.29	38.105
1368.3	42.382
1368.31	35.315
1368.32	28.066
1368.33	34.373
1368.34	39.827
1368.35	30.373
1368.36	28.614
1368.37	31.09
1368.38	30.882
1368.39	34.168
1368.4	35.908
1368.41	35.042
1368.42	34.505
1368.43	34.557
1368.44	30.085
1368.45	34.371
1368.46	34.225
1368.47	20.619
1368.48	21.051
1368.49	26.983
1368.5	23.744
1368.51	14.678
1368.52	18.098
1368.53	34.97
1368.54	38.71
1368.55	29.646
1368.56	26.55
1368.57	26.701
1368.58	26.185
1368.59	28.539
1368.6	30.747
1368.61	27.089
1368.62	22.1
1368.63	24.672
1368.64	30.476
1368.65	30.438
1368.66	29.148
1368.67	29.644
1368.68	29.147
1368.69	23.252
1368.7	28.411
1368.71	34.494
1368.72	38.482
1368.73	42.734
1368.74	34.557
1368.75	22.721
1368.76	20.814
1368.77	26.337
1368.78	31.87
1368.79	30.242
1368.8	29.924
1368.81	25.586
1368.82	25.071
1368.83	33.787
1368.84	30.682
1368.85	26.837
1368.86	33.726
1368.87	35.844
1368.88	39.258
1368.89	39.801
1368.9	30.127
1368.91	23.177
1368.92	27.167
1368.93	38.373
1368.94	44.838
1368.95	40.374
1368.96	38.377
1368.97	40.745
1368.98	43.726
1368.99	37.382
1369	29.102
1369.01	27.891
1369.02	24.025
1369.03	23.489
1369.04	32.093
1369.05	38.2
1369.06	43.478
1369.07	43.333
1369.08	33.23
1369.09	33.833
1369.1	42.226
1369.11	33.215
1369.12	30.347
1369.13	28.72
1369.14	33.271
1369.15	40.758
1369.16	36.651
1369.17	37.42
1369.18	40.549
1369.19	38.451
1369.2	35.569
1369.21	27.771
1369.22	27.498
1369.23	33.926
1369.24	38.232
1369.25	30.106
1369.26	27.979
1369.27	32.828
1369.28	39.57
1369.29	41.002
1369.3	42.246
1369.31	37.429
1369.32	35.373
1369.33	43.162
1369.34	35.546
1369.35	30.91
1369.36	40.775
1369.37	36.174
1369.38	23.903
1369.39	32.795
1369.4	41.873
1369.41	41.292
1369.42	43.501
1369.43	44.992
1369.44	40.326
1369.45	43.23
1369.46	41.85
1369.47	28.784
1369.48	30.257
1369.49	36.711
1369.5	46.261
1369.51	35.436
1369.52	30.242
1369.53	18.407
1369.54	13.878
1369.55	18.297
1369.56	36.445
1369.57	43.426
1369.58	33.074
1369.59	29.736
1369.6	30.645
1369.61	31.694
1369.62	39.412
1369.63	32.682
1369.64	38.465
1369.65	42.874
1369.66	33.577
1369.67	28.101
1369.68	34.375
1369.69	43.184
1369.7	37.838
1369.71	29.082
1369.72	26.072
1369.73	36.867
1369.74	40.318
1369.75	33.4
1369.76	32.279
1369.77	38.851
1369.78	31.832
1369.79	22.994
1369.8	28.959
1369.81	29.985
1369.82	33.917
1369.83	39.401
1369.84	39.357
1369.85	33.612
1369.86	23.843
1369.87	23.526
1369.88	36.6
1369.89	38.381
1369.9	38.615
1369.91	37.668
1369.92	31.469
1369.93	34.413
1369.94	33.45
1369.95	33.617
1369.96	33.679
1369.97	30.559
1369.98	26.53
1369.99	26.508
1370	32.763
1370.01	40.131
1370.02	41.551
1370.03	39.128
1370.04	34.766
1370.05	31.39
1370.06	37.903
1370.07	47.595
1370.08	49.018
1370.09	43.948
1370.1	41.672
1370.11	44.304
1370.12	43.249
1370.13	33.135
1370.14	27.917
1370.15	24.992
1370.16	29.83
1370.17	46.083
1370.18	42.948
1370.19	35.023
1370.2	36.028
1370.21	34.434
1370.22	35.703
1370.23	34.419
1370.24	34.572
1370.25	35.84
1370.26	40.835
1370.27	43.056
1370.28	39.995
1370.29	33.886
1370.3	33.887
1370.31	31.435
1370.32	33.654
1370.33	38.632
1370.34	38.241
1370.35	41.385
1370.36	44.581
1370.37	44.492
1370.38	44.323
1370.39	43.586
1370.4	42.567
1370.41	39.119
1370.42	32.576
1370.43	28.527
1370.44	37.255
1370.45	39.561
1370.46	29.117
1370.47	25.267
1370.48	29.045
1370.49	38.848
1370.5	39.082
1370.51	32.603
1370.52	32.413
1370.53	31.212
1370.54	32.142
1370.55	36.862
1370.56	36.233
1370.57	32.632
1370.58	31.301
1370.59	33.757
1370.6	37.455
1370.61	38.649
1370.62	30.337
1370.63	24.023
1370.64	25.663
1370.65	34.118
1370.66	42.052
1370.67	39.643
1370.68	42.225
1370.69	43.827
1370.7	37.882
1370.71	38.888
1370.72	40.53
1370.73	35.265
1370.74	34.474
1370.75	34.417
1370.76	43.211
1370.77	42.09
1370.78	31.512
1370.79	27.828
1370.8	25.973
1370.81	34.329
1370.82	37.157
1370.83	27.546
1370.84	28.332
1370.85	32.827
1370.86	31.024
1370.87	34.671
1370.88	41.403
1370.89	29.373
1370.9	25.436
1370.91	24.359
1370.92	24.187
1370.93	22.77
1370.94	20.865
1370.95	27.191
1370.96	33.871
1370.97	29.807
1370.98	25.24
1370.99	23.189
1371	33.363
1371.01	30.811
1371.02	26.112
1371.03	35.453
1371.04	33.654
1371.05	35.725
1371.06	37.663
1371.07	25.446
1371.08	32.197
1371.09	45.317
1371.1	45.982
1371.11	44.598
1371.12	37.059
1371.13	31.305
1371.14	36.283
1371.15	35.887
1371.16	28.953
1371.17	33.838
1371.18	38.08
1371.19	37.759
1371.2	34.225
1371.21	28.92
1371.22	34.905
1371.23	33.767
1371.24	27.515
1371.25	26.428
1371.26	28.082
1371.27	30.879
1371.28	38.542
1371.29	44.146
1371.3	43.635
1371.31	39.306
1371.32	33.659
1371.33	33.345
1371.34	37.901
1371.35	34.741
1371.36	30.98
1371.37	38.234
1371.38	43.313
1371.39	37.119
1371.4	41.106
1371.41	42.834
1371.42	40.811
1371.43	42.886
1371.44	41.975
1371.45	42.192
1371.46	35.101
1371.47	31.051
1371.48	40.2
1371.49	43.083
1371.5	37.34
1371.51	34.459
1371.52	35.197
1371.53	31.849
1371.54	25.816
1371.55	29.873
1371.56	38.521
1371.57	37.616
1371.58	43.219
1371.59	38.758
1371.6	39.721
1371.61	43.156
1371.62	44.422
1371.63	51.92
1371.64	50.927
1371.65	41.764
1371.66	45.566
1371.67	47.285
1371.68	37.607
1371.69	43.406
1371.7	47.703
1371.71	45.073
1371.72	40.331
1371.73	43.519
1371.74	43.162
1371.75	37.943
1371.76	40.546
1371.77	45.098
1371.78	38.6
1371.79	36.184
1371.8	36.424
1371.81	28.599
1371.82	26.406
1371.83	34.114
1371.84	34.782
1371.85	30.908
1371.86	35.509
1371.87	33.695
1371.88	32.575
1371.89	34.08
1371.9	25.456
1371.91	28.571
1371.92	35.907
1371.93	36.041
1371.94	31.231
1371.95	28.819
1371.96	29.217
1371.97	31.569
1371.98	29.098
1371.99	26.915
1372	35.675
1372.01	45.478
1372.02	40.565
1372.03	38.108
1372.04	39.889
1372.05	37.23
1372.06	38.291
1372.07	38.091
1372.08	39.325
1372.09	33.364
1372.1	22.528
1372.11	26.94
1372.12	33.995
1372.13	32.929
1372.14	33.392
1372.15	34.271
1372.16	31.494
1372.17	36.024
1372.18	46.184
1372.19	43.573
1372.2	41.547
1372.21	45.999
1372.22	41.549
1372.23	38.769
1372.24	33.008
1372.25	35.034
1372.26	40.213
1372.27	35.465
1372.28	32.698
1372.29	33.791
1372.3	32.062
1372.31	38.157
1372.32	39.784
1372.33	28.37
1372.34	25.636
1372.35	34.862
1372.36	40.795
1372.37	38.783
1372.38	38.154
1372.39	40.715
1372.4	42.7
1372.41	40.919
1372.42	41.005
1372.43	37.857
1372.44	40.342
1372.45	43.866
1372.46	42.566
1372.47	45.915
1372.48	48.57
1372.49	43.652
1372.5	35.467
1372.51	36.045
1372.52	34.512
1372.53	35.964
1372.54	36.559
1372.55	37.341
1372.56	43.42
1372.57	42.729
1372.58	35.641
1372.59	34.207
1372.6	34.421
1372.61	39.868
1372.62	45.551
1372.63	41.803
1372.64	35.186
1372.65	40.366
1372.66	45.898
1372.67	51.784
1372.68	61.474
1372.69	71.654
1372.7	76.507
1372.71	75.441
1372.72	70.092
1372.73	57.226
1372.74	51.314
1372.75	53.207
1372.76	52.184
1372.77	40.778
1372.78	32.131
1372.79	30.125
1372.8	28.215
1372.81	39.329
1372.82	40.717
1372.83	36.173
1372.84	37.234
1372.85	40.582
1372.86	36.819
1372.87	34.593
1372.88	37.982
1372.89	38.296
1372.9	35.24
1372.91	30.421
1372.92	29.31
1372.93	26.874
1372.94	21.252
1372.95	27.628
1372.96	27.278
1372.97	22.823
1372.98	24.792
1372.99	26.196
1373	37.429
1373.01	35.756
1373.02	39.498
1373.03	46.881
1373.04	43.48
1373.05	31.065
1373.06	31.26
1373.07	33.889
1373.08	33.101
1373.09	31.897
1373.1	32.793
1373.11	36.288
1373.12	42.901
1373.13	47.945
1373.14	50.701
1373.15	43.509
1373.16	37.214
1373.17	40.733
1373.18	42.209
1373.19	41.577
1373.2	36.167
1373.21	38.639
1373.22	39.598
1373.23	42.653
1373.24	45.991
1373.25	48.668
1373.26	43.034
1373.27	35.044
1373.28	31.162
1373.29	40.827
1373.3	41.035
1373.31	42.839
1373.32	43.686
1373.33	41.679
1373.34	43.319
1373.35	43.158
1373.36	37.88
1373.37	38.628
1373.38	33.443
1373.39	38.392
1373.4	39.92
1373.41	41.962
1373.42	47.71
1373.43	43.573
1373.44	46.123
1373.45	44.198
1373.46	36.824
1373.47	35.598
1373.48	33.114
1373.49	39.656
1373.5	42.522
1373.51	39.614
1373.52	39.194
1373.53	37.075
1373.54	39.53
1373.55	41.689
1373.56	39.255
1373.57	40.01
1373.58	38.258
1373.59	39.607
1373.6	42.906
1373.61	49.372
1373.62	44.285
1373.63	32.549
1373.64	34.442
1373.65	41.514
1373.66	39.451
1373.67	40.063
1373.68	42.815
1373.69	37.077
1373.7	31.584
1373.71	34.576
1373.72	46.738
1373.73	45.01
1373.74	39.117
1373.75	34.381
1373.76	32.335
1373.77	40.556
1373.78	42.316
1373.79	41.847
1373.8	40.678
1373.81	31.92
1373.82	38.758
1373.83	40.12
1373.84	39.988
1373.85	42.937
1373.86	33.184
1373.87	36.654
1373.88	43.199
1373.89	47.102
1373.9	40.802
1373.91	36.474
1373.92	45.18
1373.93	52.748
1373.94	47.893
1373.95	42.822
1373.96	45.837
1373.97	45.015
1373.98	35.448
1373.99	29.083
1374	36.754
1374.01	42.56
1374.02	46.214
1374.03	44.331
1374.04	37.965
1374.05	37.758
1374.06	38.467
1374.07	42.097
1374.08	45.844
1374.09	44.987
1374.1	34.508
1374.11	31.163
1374.12	35.276
1374.13	40.23
1374.14	43.854
1374.15	42.682
1374.16	36.414
1374.17	33.72
1374.18	32.789
1374.19	31.794
1374.2	36.307
1374.21	37.832
1374.22	34.692
1374.23	32.357
1374.24	35.368
1374.25	42.118
1374.26	39.617
1374.27	35.553
1374.28	33.098
1374.29	35.852
1374.3	38.11
1374.31	41.952
1374.32	42.082
1374.33	32.375
1374.34	31.756
1374.35	36.612
1374.36	37.719
1374.37	38.181
1374.38	30.402
1374.39	31.241
1374.4	34.373
1374.41	40.656
1374.42	43.108
1374.43	39.679
1374.44	38.191
1374.45	37.723
1374.46	37.032
1374.47	33.949
1374.48	29.839
1374.49	36.615
1374.5	38.994
1374.51	37.74
1374.52	34.913
1374.53	33.866
1374.54	34.103
1374.55	37.256
1374.56	34.108
1374.57	29.283
1374.58	39.844
1374.59	39.806
1374.6	34.641
1374.61	30.861
1374.62	30.792
1374.63	35.256
1374.64	39.536
1374.65	41.216
1374.66	38.579
1374.67	38.447
1374.68	41.645
1374.69	44.828
1374.7	42.906
1374.71	44.453
1374.72	44.07
1374.73	47.166
1374.74	41.466
1374.75	30.63
1374.76	33.388
1374.77	41.107
1374.78	47.341
1374.79	45.607
1374.8	43.022
1374.81	44.489
1374.82	44.906
1374.83	44.538
1374.84	42.126
1374.85	45.608
1374.86	43.26
1374.87	35.798
1374.88	36.33
1374.89	39.112
1374.9	36.52
1374.91	30.736
1374.92	36.185
1374.93	43.861
1374.94	41.791
1374.95	36.214
1374.96	31.545
1374.97	29.826
1374.98	28.245
1374.99	33.982
1375	43.494
1375.01	45.503
1375.02	48.568
1375.03	49.495
1375.04	48.646
1375.05	46.677
1375.06	50.399
1375.07	53.739
1375.08	48.435
1375.09	49.47
1375.1	53.185
1375.11	56.184
1375.12	60.291
1375.13	60.017
1375.14	52.689
1375.15	36.897
1375.16	30.802
1375.17	37.415
1375.18	30.561
1375.19	25.077
1375.2	34.897
1375.21	42.518
1375.22	34.672
1375.23	30.895
1375.24	36.394
1375.25	38.199
1375.26	39.935
1375.27	42.134
1375.28	44.271
1375.29	36.957
1375.3	31.344
1375.31	35.589
1375.32	33.211
1375.33	30.333
1375.34	31.906
1375.35	29.892
1375.36	22.83
1375.37	24.454
1375.38	31.323
1375.39	40.979
1375.4	49.055
1375.41	42.191
1375.42	36.825
1375.43	44.079
1375.44	48.362
1375.45	49.036
1375.46	46.634
1375.47	44.518
1375.48	42.307
1375.49	44.553
1375.5	48.542
1375.51	49.172
1375.52	39.719
1375.53	32.301
1375.54	32.019
1375.55	35.769
1375.56	36.632
1375.57	34.03
1375.58	38.01
1375.59	41.356
1375.6	29.409
1375.61	31.155
1375.62	41.066
1375.63	33.151
1375.64	31.75
1375.65	39.598
1375.66	39.335
1375.67	39.935
1375.68	35.541
1375.69	36.963
1375.7	45.702
1375.71	49.469
1375.72	45.682
1375.73	41.284
1375.74	44.171
1375.75	43.386
1375.76	43.066
1375.77	48.032
1375.78	47.029
1375.79	48.291
1375.8	41.819
1375.81	42.152
1375.82	46.034
1375.83	47.316
1375.84	51.044
1375.85	50.755
1375.86	48.901
1375.87	54.495
1375.88	51.541
1375.89	40.164
1375.9	35.664
1375.91	34.529
1375.92	37.212
1375.93	40.064
1375.94	41.45
1375.95	40.352
1375.96	33.595
1375.97	30.04
1375.98	32.89
1375.99	35.507
1376	48.877
1376.01	48.78
1376.02	41.984
1376.03	34.657
1376.04	38.863
1376.05	39.539
1376.06	45.659
1376.07	44.979
1376.08	41.801
1376.09	36.717
1376.1	41.199
1376.11	44.631
1376.12	46.528
1376.13	40.426
1376.14	40.265
1376.15	47.18
1376.16	51.259
1376.17	53.546
1376.18	51.217
1376.19	40.815
1376.2	36.575
1376.21	43.247
1376.22	39.212
1376.23	31.322
1376.24	40.875
1376.25	46.319
1376.26	47.75
1376.27	44.423
1376.28	40.228
1376.29	34.289
1376.3	37.066
1376.31	38.552
1376.32	43.507
1376.33	40.892
1376.34	35.868
1376.35	36.994
1376.36	37.375
1376.37	46.403
1376.38	49.834
1376.39	45.067
1376.4	36.159
1376.41	42.145
1376.42	44.977
1376.43	41.179
1376.44	32.964
1376.45	35.749
1376.46	42.263
1376.47	44.321
1376.48	40.501
1376.49	37.284
1376.5	43.378
1376.51	47.417
1376.52	49.621
1376.53	45.994
1376.54	38.335
1376.55	39.004
1376.56	50.348
1376.57	45.51
1376.58	44.257
1376.59	44.513
1376.6	41.645
1376.61	44.253
1376.62	45.076
1376.63	45.235
1376.64	43.792
1376.65	42.411
1376.66	46.113
1376.67	46.866
1376.68	34.301
1376.69	38.821
1376.7	46.528
1376.71	33.637
1376.72	38.028
1376.73	50.987
1376.74	51.477
1376.75	48.621
1376.76	45.972
1376.77	37.077
1376.78	36.222
1376.79	38.792
1376.8	38.181
1376.81	46.829
1376.82	42.22
1376.83	41.764
1376.84	47.481
1376.85	53.351
1376.86	57.297
1376.87	62.428
1376.88	66.862
1376.89	68.671
1376.9	68.83
1376.91	64.787
1376.92	50.331
1376.93	43.01
1376.94	46.975
1376.95	44.995
1376.96	38.06
1376.97	39.497
1376.98	41.339
1376.99	37.433
1377	37.746
1377.01	37.879
1377.02	32.92
1377.03	37.51
1377.04	42.34
1377.05	44.107
1377.06	45.883
1377.07	45.462
1377.08	43.686
1377.09	35.58
1377.1	38.171
1377.11	45.893
1377.12	40.411
1377.13	34.284
1377.14	40.671
1377.15	42.001
1377.16	35.922
1377.17	33.582
1377.18	29.361
1377.19	42.839
1377.2	45.428
1377.21	38.563
1377.22	34.414
1377.23	30.017
1377.24	41.551
1377.25	41.837
1377.26	40.004
1377.27	43.525
1377.28	46.598
1377.29	45.844
1377.3	44.619
1377.31	41.988
1377.32	39.709
1377.33	44.384
1377.34	41.638
1377.35	41.636
1377.36	45.228
1377.37	43.043
1377.38	44.846
1377.39	47.258
1377.4	41.971
1377.41	43.492
1377.42	43.034
1377.43	38.705
1377.44	34.156
1377.45	38.867
1377.46	41.893
1377.47	38.966
1377.48	42.447
1377.49	38.846
1377.5	32.44
1377.51	34.039
1377.52	36.917
1377.53	35.672
1377.54	27.422
1377.55	30.615
1377.56	31.528
1377.57	41.363
1377.58	44.596
1377.59	41.075
1377.6	25.32
1377.61	23.102
1377.62	38.007
1377.63	46.96
1377.64	42.984
1377.65	37.712
1377.66	30.287
1377.67	30.615
1377.68	37.401
1377.69	43.58
1377.7	39.871
1377.71	35.162
1377.72	37.751
1377.73	36.622
1377.74	25.983
1377.75	24.051
1377.76	24.06
1377.77	31.221
1377.78	38.367
1377.79	40.398
1377.8	37.67
1377.81	31.085
1377.82	31.831
1377.83	40.755
1377.84	39.45
1377.85	42.46
1377.86	41.519
1377.87	39.476
1377.88	37.331
1377.89	39.421
1377.9	38.183
1377.91	30.997
1377.92	30.787
1377.93	32.257
1377.94	35.933
1377.95	38.132
1377.96	34.83
1377.97	35.636
1377.98	37.908
1377.99	32.158
1378	26.129
1378.01	33.754
1378.02	39.283
1378.03	39.001
1378.04	39.589
1378.05	37.663
1378.06	33.549
1378.07	37.838
1378.08	33.313
1378.09	29.804
1378.1	35.773
1378.11	44.349
1378.12	40.893
1378.13	35.877
1378.14	38.155
1378.15	35.244
1378.16	34.129
1378.17	34.703
1378.18	38.118
1378.19	35.16
1378.2	34.407
1378.21	29.83
1378.22	26.031
1378.23	25.102
1378.24	32.546
1378.25	42.147
1378.26	43.124
1378.27	30.332
1378.28	29.655
1378.29	41.147
1378.3	47.679
1378.31	48.33
1378.32	34.772
1378.33	37.249
1378.34	50.694
1378.35	52.68
1378.36	45.662
1378.37	42.484
1378.38	41.474
1378.39	40.229
1378.4	38.615
1378.41	34.256
1378.42	36.874
1378.43	40.029
1378.44	46.606
1378.45	46.906
1378.46	42.263
1378.47	34.989
1378.48	30.429
1378.49	34.802
1378.5	43.595
1378.51	40.08
1378.52	29.204
1378.53	33.103
1378.54	32.853
1378.55	38.411
1378.56	40.248
1378.57	33.107
1378.58	39.754
1378.59	45.674
1378.6	44.694
1378.61	37.95
1378.62	35.829
1378.63	44.693
1378.64	44.408
1378.65	34.011
1378.66	35.766
1378.67	43.435
1378.68	43.987
1378.69	45.935
1378.7	38.529
1378.71	35.635
1378.72	37.993
1378.73	34.454
1378.74	28.289
1378.75	32.312
1378.76	39.582
1378.77	37.205
1378.78	40.141
1378.79	39.678
1378.8	44.012
1378.81	44.977
1378.82	37.214
1378.83	32.895
1378.84	31.567
1378.85	37.312
1378.86	38.336
1378.87	30.679
1378.88	27.947
1378.89	35.486
1378.9	40.912
1378.91	42.762
1378.92	41.685
1378.93	30.169
1378.94	23.585
1378.95	20.613
1378.96	19.484
1378.97	32.603
1378.98	45.719
1378.99	44.355
1379	42.285
1379.01	42.455
1379.02	40.481
1379.03	42.337
1379.04	42.931
1379.05	43.112
1379.06	42.319
1379.07	35.953
1379.08	32.33
1379.09	32.861
1379.1	34.461
1379.11	37.781
1379.12	34.997
1379.13	33.895
1379.14	35.659
1379.15	36.194
1379.16	37.462
1379.17	34.394
1379.18	37.366
1379.19	41.569
1379.2	36.702
1379.21	31.35
1379.22	38.415
1379.23	45.155
1379.24	36.699
1379.25	37.437
1379.26	37.018
1379.27	37.707
1379.28	43.431
1379.29	39.958
1379.3	41.98
1379.31	42.702
1379.32	32.006
1379.33	40.043
1379.34	43.242
1379.35	44.41
1379.36	48.821
1379.37	44.376
1379.38	40.009
1379.39	38.984
1379.4	43.74
1379.41	45.407
1379.42	48.475
1379.43	45.689
1379.44	48.439
1379.45	44.265
1379.46	38.67
1379.47	38.312
1379.48	38.909
1379.49	37.274
1379.5	35.779
1379.51	38.345
1379.52	44.278
1379.53	46.623
1379.54	44.492
1379.55	38.256
1379.56	35.425
1379.57	39.342
1379.58	41.275
1379.59	37.814
1379.6	38.672
1379.61	40.769
1379.62	44.775
1379.63	47.945
1379.64	48.208
1379.65	49.965
1379.66	49.363
1379.67	46.293
1379.68	44.334
1379.69	36.319
1379.7	38.639
1379.71	38.78
1379.72	38.401
1379.73	34.453
1379.74	34.858
1379.75	30.552
1379.76	32.666
1379.77	40.217
1379.78	39.576
1379.79	41.519
1379.8	37.739
1379.81	34.642
1379.82	28.166
1379.83	33.466
1379.84	39.321
1379.85	36.383
1379.86	36.253
1379.87	34.896
1379.88	31.158
1379.89	33.761
1379.9	40.472
1379.91	41.245
1379.92	43.112
1379.93	42.729
1379.94	41.492
1379.95	39.637
1379.96	31.615
1379.97	33.905
1379.98	34.944
1379.99	36.082
1380	44.544
1380.01	44.146
1380.02	44.239
1380.03	42.108
1380.04	40.36
1380.05	45.664
1380.06	47.237
1380.07	49.049
1380.08	46.549
1380.09	40.218
1380.1	36.52
1380.11	34.58
1380.12	30.528
1380.13	36.705
1380.14	41.477
1380.15	42.811
1380.16	47.288
1380.17	48.631
1380.18	43.313
1380.19	35.008
1380.2	36.551
1380.21	40.729
1380.22	39.905
1380.23	37.159
1380.24	40.038
1380.25	34.984
1380.26	38.677
1380.27	48.229
1380.28	35.376
1380.29	32.132
1380.3	40.86
1380.31	49.67
1380.32	47.312
1380.33	44.487
1380.34	48.028
1380.35	44.709
1380.36	34.683
1380.37	40.721
1380.38	48.114
1380.39	53.957
1380.4	58.589
1380.41	55.874
1380.42	40.947
1380.43	35.267
1380.44	36.192
1380.45	42.206
1380.46	45.027
1380.47	41.687
1380.48	42.812
1380.49	43.292
1380.5	44.526
1380.51	40.576
1380.52	39.693
1380.53	45.324
1380.54	43.614
1380.55	38.296
1380.56	35.038
1380.57	41.137
1380.58	48.758
1380.59	47.516
1380.6	37.503
1380.61	29.568
1380.62	34.6
1380.63	37.475
1380.64	37.669
1380.65	43.352
1380.66	43.185
1380.67	44.095
1380.68	44.695
1380.69	45.916
1380.7	45.816
1380.71	38.722
1380.72	35.28
1380.73	34.529
1380.74	39.988
1380.75	43.216
1380.76	39.193
1380.77	38.841
1380.78	36.905
1380.79	34.894
1380.8	39.153
1380.81	37.323
1380.82	42.69
1380.83	38.74
1380.84	30.829
1380.85	33.57
1380.86	41.784
1380.87	45.445
1380.88	42.125
1380.89	42.39
1380.9	37.943
1380.91	41.081
1380.92	42.535
1380.93	37.405
1380.94	36.77
1380.95	40.314
1380.96	39.591
1380.97	38.122
1380.98	34.969
1380.99	29.792
1381	32.211
1381.01	36.977
1381.02	31.295
1381.03	26.13
1381.04	27.087
1381.05	19.045
1381.06	21.65
1381.07	28.687
1381.08	30.907
1381.09	37.315
1381.1	44.054
1381.11	38.068
1381.12	34.977
1381.13	32.744
1381.14	24.526
1381.15	34.412
1381.16	35.603
1381.17	32.417
1381.18	40.407
1381.19	40.291
1381.2	32.733
1381.21	33.561
1381.22	34.992
1381.23	36.714
1381.24	36.141
1381.25	31.85
1381.26	29.916
1381.27	30.357
1381.28	31.909
1381.29	37.183
1381.3	38.346
1381.31	41.624
1381.32	45.533
1381.33	39.804
1381.34	36.751
1381.35	40.609
1381.36	33.031
1381.37	33.94
1381.38	38.794
1381.39	43.799
1381.4	45.631
1381.41	39.608
1381.42	38.919
1381.43	42.83
1381.44	46.256
1381.45	43.067
1381.46	33.149
1381.47	31.924
1381.48	40.29
1381.49	47.797
1381.5	46.659
1381.51	38.431
1381.52	37.363
1381.53	43.033
1381.54	34.999
1381.55	24.825
1381.56	29.152
1381.57	34.25
1381.58	37.9
1381.59	38.917
1381.6	36.59
1381.61	42.195
1381.62	40.393
1381.63	37.668
1381.64	39.529
1381.65	45.2
1381.66	47.227
1381.67	44.226
1381.68	40.089
1381.69	43.883
1381.7	42.411
1381.71	34.016
1381.72	43.503
1381.73	38.712
1381.74	26.934
1381.75	38.947
1381.76	46.568
1381.77	51.373
1381.78	51.55
1381.79	47.63
1381.8	37.647
1381.81	35.235
1381.82	42.145
1381.83	44.362
1381.84	38.574
1381.85	33.234
1381.86	39.357
1381.87	43.272
1381.88	36.605
1381.89	28.99
1381.9	31.534
1381.91	31.477
1381.92	31.55
1381.93	34.07
1381.94	35.273
1381.95	35.651
1381.96	31.052
1381.97	29.436
1381.98	31.297
1381.99	27.325
1382	30.456
1382.01	25.749
1382.02	23.211
1382.03	37.086
1382.04	40.909
1382.05	37.6
1382.06	37.577
1382.07	42.945
1382.08	43.506
1382.09	40.02
1382.1	41.369
1382.11	42.274
1382.12	44.43
1382.13	44.236
1382.14	39.075
1382.15	35.87
1382.16	36.954
1382.17	42.633
1382.18	47.29
1382.19	50.117
1382.2	51.93
1382.21	50.97
1382.22	48.505
1382.23	45.583
1382.24	41.837
1382.25	42.776
1382.26	48.16
1382.27	47.677
1382.28	41.039
1382.29	36.605
1382.3	34.874
1382.31	35.198
1382.32	38.055
1382.33	31.583
1382.34	27.431
1382.35	32.889
1382.36	41.943
1382.37	43.646
1382.38	33.315
1382.39	35.269
1382.4	41.299
1382.41	38.698
1382.42	28.755
1382.43	23.609
1382.44	33.417
1382.45	37.226
1382.46	33.631
1382.47	33.432
1382.48	37.651
1382.49	37.191
1382.5	34.866
1382.51	30.673
1382.52	33.186
1382.53	38.504
1382.54	38.518
1382.55	34.413
1382.56	32.607
1382.57	29.34
1382.58	31.376
1382.59	40.666
1382.6	41.839
1382.61	34.839
1382.62	24.347
1382.63	29.607
1382.64	38.258
1382.65	41.978
1382.66	44.077
1382.67	40.589
1382.68	31.711
1382.69	29.971
1382.7	39.174
1382.71	40.375
1382.72	39.734
1382.73	41.46
1382.74	45.988
1382.75	44.106
1382.76	40.58
1382.77	38.277
1382.78	33.159
1382.79	36.005
1382.8	41.634
1382.81	41.98
1382.82	40.331
1382.83	39.029
1382.84	37.67
1382.85	33.178
1382.86	33.439
1382.87	41.868
1382.88	44.524
1382.89	40.615
1382.9	37.394
1382.91	41.292
1382.92	41.44
1382.93	39.44
1382.94	35.65
1382.95	29.677
1382.96	35.711
1382.97	38.235
1382.98	37.515
1382.99	32.19
1383	30.185
1383.01	32.975
1383.02	35.21
1383.03	36.157
1383.04	31.848
1383.05	31.425
1383.06	36.619
1383.07	43.707
1383.08	44.556
1383.09	40.781
1383.1	39.928
1383.11	37.426
1383.12	40.813
1383.13	43.736
1383.14	36.755
1383.15	36.949
1383.16	39.921
1383.17	35.634
1383.18	35.618
1383.19	33.158
1383.2	35.2
1383.21	38.528
1383.22	33.096
1383.23	36.933
1383.24	36.796
1383.25	31.617
1383.26	33.369
1383.27	36.437
1383.28	35.715
1383.29	35.62
1383.3	34.478
1383.31	34.927
1383.32	39
1383.33	35.872
1383.34	31.078
1383.35	33.89
1383.36	36.537
1383.37	35.207
1383.38	36.929
1383.39	38.042
1383.4	31.486
1383.41	32.042
1383.42	39.385
1383.43	38.482
1383.44	36.061
1383.45	35.862
1383.46	28.087
1383.47	27.582
1383.48	36.382
1383.49	41.003
1383.5	37.784
1383.51	36.861
1383.52	38.136
1383.53	41.936
1383.54	41.803
1383.55	42.091
1383.56	41.14
1383.57	36.452
1383.58	36.852
1383.59	43.57
1383.6	43.034
1383.61	38.12
1383.62	38.631
1383.63	40.405
1383.64	46.251
1383.65	46.061
1383.66	30.091
1383.67	16.359
1383.68	24.604
1383.69	39.818
1383.7	40.55
1383.71	34.189
1383.72	31.303
1383.73	38.927
1383.74	40.242
1383.75	28.747
1383.76	17.356
1383.77	26.84
1383.78	35.365
1383.79	33.32
1383.8	33.203
1383.81	32.214
1383.82	27.333
1383.83	26.192
1383.84	30.964
1383.85	35.306
1383.86	38.625
1383.87	31.639
1383.88	31.273
1383.89	41.472
1383.9	42.857
1383.91	33.189
1383.92	34.835
1383.93	42.352
1383.94	35.834
1383.95	27.171
1383.96	26.067
1383.97	34.149
1383.98	33.547
1383.99	29.333
1384	26.878
1384.01	32.416
1384.02	33.525
1384.03	32.442
1384.04	42.316
1384.05	47.603
1384.06	42.446
1384.07	30.529
1384.08	40.786
1384.09	50.735
1384.1	46.015
1384.11	40.062
1384.12	44.756
1384.13	47.576
1384.14	45.149
1384.15	40
1384.16	39.531
1384.17	39.198
1384.18	35.1
1384.19	32.072
1384.2	41.882
1384.21	43.822
1384.22	31.866
1384.23	31.7
1384.24	37.77
1384.25	36.436
1384.26	30.364
1384.27	36.891
1384.28	41.357
1384.29	33.612
1384.3	35.988
1384.31	39.056
1384.32	43.751
1384.33	46.864
1384.34	39.848
1384.35	27.368
1384.36	26.935
1384.37	39.022
1384.38	46.625
1384.39	48.347
1384.4	40.708
1384.41	33.194
1384.42	34.274
1384.43	35.081
1384.44	31.309
1384.45	28.67
1384.46	33.301
1384.47	40.211
1384.48	39.777
1384.49	39.127
1384.5	37.129
1384.51	37.452
1384.52	39.403
1384.53	39.759
1384.54	38.22
1384.55	37.924
1384.56	37.76
1384.57	36.991
1384.58	36.575
1384.59	33.724
1384.6	39.472
1384.61	36.124
1384.62	33.082
1384.63	38.624
1384.64	42.302
1384.65	42.491
1384.66	36.74
1384.67	29.088
1384.68	31.828
1384.69	31.464
1384.7	35.931
1384.71	41.335
1384.72	41.372
1384.73	36.431
1384.74	34.423
1384.75	30.615
1384.76	34.716
1384.77	36.594
1384.78	38.491
1384.79	45.02
1384.8	47.632
1384.81	45.63
1384.82	36.501
1384.83	26.943
1384.84	37.956
1384.85	43.151
1384.86	45.866
1384.87	44.068
1384.88	38.915
1384.89	36.905
1384.9	41.935
1384.91	42.102
1384.92	34.203
1384.93	30.542
1384.94	30.106
1384.95	35.384
1384.96	35.892
1384.97	28.532
1384.98	24.734
[truncated: 2 more rows]
