# Supplementary material for: Direct linking of Greenland and Antarctic ice cores at the Toba eruption (74 ka BP)
Source: Copernicus journal article supplement (doi:10.5194/cp-9-749-2013), 2013-03-19
Supplement: Supplementary file 2 [file Figure_2_NGRIP.xls]

## Sheet: Header
Records from the Greenland NGRIP ice core at around the Laschamp event
applied in Figure 2 of the paper:
Direct linking of Greenland and Antarctic ice cores at the Toba eruption (74 ka BP)
Svensson et al., Climate of the Past, 2013

## Sheet: Isotopes
% Depth(m)	d18O(permil)
2105	-43.26
2105.05	-39.91
2105.1	-40.94
2105.15	-40.31
2105.2	-42.25
2105.25	-40.8
2105.3	-43.32
2105.35	-43.85
2105.4	-40.12
2105.45	-42.46
2105.5	-44.92
2105.55	-43.09
2105.6	-42.46
2105.65	-39.35
2105.7	-38.56
2105.75	-41.89
2105.8	-43.79
2105.85	-42.52
2105.9	-42.86
2105.95	-42.66
2106	-44.53
2106.05	-44.48
2106.1	-45.38
2106.15	-45.3
2106.2	-40.66
2106.25	-40.63
2106.3	-43.01
2106.35	-43.81
2106.4	-43.95
2106.45	-41.43
2106.5	-42.65
2106.55	-43.58
2106.6	-41.65
2106.65	-43.02
2106.7	-42.62
2106.75	-42.47
2106.8	-42.09
2106.85	-43.33
2106.9	-42.57
2106.95	-46.19
2107	-45.19
2107.05	-43.98
2107.1	-45.49
2107.15	-47.92
2107.2	-44.78
2107.25	-42.68
2107.3	-41.51
2107.35	-40.39
2107.4	-42.38
2107.45	-43.57
2107.5	-44.68
2107.55	-42.86
2107.6	-40.56
2107.65	-43.58
2107.7	-40.55
2107.75	-43.28
2107.8	-43.22
2107.85	-43.78
2107.9	-41.86
2107.95	-41.4
2108	-42.7
2108.05	-41.03
2108.1	-43.92
2108.15	-45.69
2108.2	-44.49
2108.25	-44.25
2108.3	-45.77
2108.35	-44.23
2108.4	-42.75
2108.45	-44.26
2108.5	-43.45
2108.55	-40.59
2108.6	-41.85
2108.65	-43.64
2108.7	-41.84
2108.75	-41.9
2108.8	-43.57
2108.85	-43.57
2108.9	-44.55
2108.95	-44.37
2109	-45.52
2109.05	-43.62
2109.1	-45.03
2109.15	-45.05
2109.2	-44.51
2109.25	-45.24
2109.3	-45.36
2109.35	-41.71
2109.4	-41.76
2109.45	-42.44
2109.5	-44.42
2109.55	-42.55
2109.6	-45.51
2109.65	-43.61
2109.7	-41.26
2109.75	-40.54
2109.8	-42.22
2109.85	-40.91
2109.9	-41.85
2109.95	-38.36
2110	-41.03
2110.05	-42.32
2110.1	-42.4
2110.15	-42.58
2110.2	-41.85
2110.25	-43.3
2110.3	-43.54
2110.35	-41.82
2110.4	-41.49
2110.45	-40.52
2110.5	-39.7
2110.55	-42.26
2110.6	-42.82
2110.65	-41.43
2110.7	-42.12
2110.75	-42.89
2110.8	-42.81
2110.85	-44.01
2110.9	-41.91
2110.95	-41.45
2111	-41.99
2111.05	-43.85
2111.1	-43.78
2111.15	-42.89
2111.2	-41.84
2111.25	-40.56
2111.3	-40.22
2111.35	-41.5
2111.4	-43.32
2111.45	-40.9
2111.5	-42.67
2111.55	-42.36
2111.6	-43.57
2111.65	-42.82
2111.7	-41.75
2111.75	-40.12
2111.8	-41.13
2111.85	-40.71
2111.9	-41.14
2111.95	-40.64
2112	-42.61
2112.05	-42.74
2112.1	-40.51
2112.15	-42.43
2112.2	-44.44
2112.25	-43.54
2112.3	-42.8
2112.35	-40.57
2112.4	-39.9
2112.45	-42.09
2112.5	-40.56
2112.55	-40.54
2112.6	-39.05
2112.65	-39.29
2112.7	-38.8
2112.75	-41.57
2112.8	-42.46
2112.85	-44.1
2112.9	-41.03
2112.95	-39.77
2113	-39.32
2113.05	-43.91
2113.1	-41.18
2113.15	-39.09
2113.2	-39.14
2113.25	-40.36
2113.3	-42.13
2113.35	-41.26
2113.4	-40.35
2113.45	-42.25
2113.5	-40.16
2113.55	-40.04
2113.6	-41.09
2113.65	-40.36
2113.7	-39.86
2113.75	-39.69
2113.8	-38.46
2113.85	-38.98
2113.9	-40.04
2113.95	-39.47
2114	-39.44
2114.05	-40.94
2114.1	-40.09
2114.15	-40.67
2114.2	-41.27
2114.25	-40.03
2114.3	-38.29
2114.35	-38.56
2114.4	-39.16
2114.45	-40.42
2114.5	-40.33
2114.55	-40.95
2114.6	-40.79
2114.65	-42.15
2114.7	-40.8
2114.75	-37.32
2114.8	-39.98
2114.85	-40.14
2114.9	-39.32
2114.95	-40.09
2115	-39.25
2115.05	-40.24
2115.1	-40.72
2115.15	-38.62
2115.2	-38.25
2115.25	-38.33
2115.3	-39.82
2115.35	-37.57
2115.4	-36.64
2115.45	-39.48
2115.5	-40.95
2115.55	-38.79
2115.6	-39.8
2115.65	-40.81
2115.7	-41.66
2115.75	-43.89
2115.8	-41.27
2115.85	-38.96
2115.9	-37.92
2115.95	-39.97
2116	-39.72
2116.05	-40.15
2116.1	-39.89
2116.15	-38.6
2116.2	-39.32
2116.25	-39.66
2116.3	-41.27
2116.35	-39.66
2116.4	-39.63
2116.45	-37.74
2116.5	-39.73
2116.55	-40.62
2116.6	-42.29
2116.65	-40.6
2116.7	-43.09
2116.75	-42.32
2116.8	-41.65
2116.85	-42.2
2116.9	-40.84
2116.95	-41.24
2117	-38.99
2117.05	-35.31
2117.1	-38.91
2117.15	-40.27
2117.2	-42.48
2117.25	-40.08
2117.3	-37.82
2117.35	-37.66
2117.4	-38.32
2117.45	-39.98
2117.5	-41.11
2117.55	-40.06
2117.6	-38.61
2117.65	-38.48
2117.7	-40.12
2117.75	-39.36
2117.8	-39.35
2117.85	-37.25
2117.9	-40.37
2117.95	-40.62
2118	-40.36
2118.05	-39
2118.1	-38.26
2118.15	-40.35
2118.2	-41.23
2118.25	-40.9
2118.3	-39.96
2118.35	-40.59
2118.4	-40.4
2118.45	-37.81
2118.5	-38.75
2118.55	-41.03
2118.6	-41.41
2118.65	-39.8
2118.7	-39.12
2118.75	-38.12
2118.8	-41.98
2118.85	-40.79
2118.9	-39.84
2118.95	-38.94
2119	-40.31
2119.05	-40.44
2119.1	-40.29
2119.15	-39.77
2119.2	-39.01
2119.25	-38.66
2119.3	-42.32
2119.35	-40.34
2119.4	-39.52
2119.45	-38.87
2119.5	-38.1
2119.55	-38.65
2119.6	-41.08
2119.65	-39.43
2119.7	-36.49
2119.75	-36.45
2119.8	-36.87
2119.85	-37.63
2119.9	-39.01
2119.95	-40.37
2120	-40.43
2120.05	-38.39
2120.1	-39.18
2120.15	-38.66
2120.2	-39.64
2120.25	-40.62
2120.3	-40.56
2120.35	-39.79
2120.4	-37.71
2120.45	-38.81
2120.5	-41.68
2120.55	-42.18
2120.6	-39.7
2120.65	-39.26
2120.7	-39.59
2120.75	-38.9
2120.8	-38.98
2120.85	-37.62
2120.9	-37.41
2120.95	-38.64
2121	-40.21
2121.05	-42.75
2121.1	-42.83
2121.15	-40.59
2121.2	-38.87
2121.25	-40.1
2121.3	-39.63
2121.35	-37.6
2121.4	-38.03
2121.45	-37.83
2121.5	-37.43
2121.55	-36.98
2121.6	-38.32
2121.65	-38.58
2121.7	-39.39
2121.75	-41.52
2121.8	-41.78
2121.85	-38.72
2121.9	-39
2121.95	-38.44
2122	-37.31
2122.05	-39.13
2122.1	-40.33
2122.15	-40.02
2122.2	-36.7
2122.25	-37.89
2122.3	-38.64
2122.35	-39.43
2122.4	-38.78
2122.45	-40.38
2122.5	-38.16
2122.55	-38.87
2122.6	-39.7
2122.65	-39.22
2122.7	-38.37
2122.75	-38.74
2122.8	-38.96
2122.85	-39.27
2122.9	-39.13
2122.95	-37.55
2123	-37.3
2123.05	-35.93
2123.1	-37.56
2123.15	-38.12
2123.2	-39.12
2123.25	-39.32
2123.3	-39.32
2123.35	-38.59
2123.4	-37.27
2123.45	-38.7
2123.5	-38.19
2123.55	-38.8
2123.6	-38.39
2123.65	-38.12
2123.7	-39.24
2123.75	-40.48
2123.8	-39.38
2123.85	-40.24
2123.9	-40.45
2123.95	-40.68
2124	-39.67
2124.05	-40.06
2124.1	-41.29
2124.15	-42.43
2124.2	-41.74
2124.25	-39.86
2124.3	-41.78
2124.35	-42.01
2124.4	-42.1
2124.45	-43.72
2124.5	-44.09
2124.55	-41.07
2124.6	-43.27
2124.65	-44.04
2124.7	-43.03
2124.75	-44.86
2124.8	-41.71
2124.85	-42.81
2124.9	-44.36
2124.95	-40.91
2125	-41.26
2125.05	-38.97
2125.1	-38.89
2125.15	-42.13
2125.2	-43.09
2125.25	-42.78
2125.3	-40.38
2125.35	-41.92
2125.4	-45.22
2125.45	-43.01
2125.5	-39.44
2125.55	-44.05
2125.6	-45.17
2125.65	-44.65
2125.7	-42.18
2125.75	-40.36
2125.8	-42.68
2125.85	-42.74
2125.9	-44.59
2125.95	-43.77
2126	-42.62
2126.05	-43.15
2126.1	-43.02
2126.15	-42.19
2126.2	-42.5
2126.25	-42.92
2126.3	-42.39
2126.35	-38.61
2126.4	-41.82
2126.45	-43.09
2126.5	-42.09
2126.55	-41.21
2126.6	-43
2126.65	-41.82
2126.7	-43.11
2126.75	-42.19
2126.8	-42.71
2126.85	-41.89
2126.9	-41.11
2126.95	-42.23
2127	-39.93
2127.05	-42.36
2127.1	-44.48
2127.15	-43.05
2127.2	-43.92
2127.25	-43.38
2127.3	-42.96
2127.35	-44.04
2127.4	-44.98
2127.45	-43.06
2127.5	-42.48
2127.55	-42.93
2127.6	-41.95
2127.65	-41.89
2127.7	-43.09
2127.75	-44.36
2127.8	-41.35
2127.85	-40.29
2127.9	-40.82
2127.95	-41.51
2128	-42.16
2128.05	-40.76
2128.1	-40.83
2128.15	-41.5
2128.2	-43.24
2128.25	-43.05
2128.3	-43.19
2128.35	-46.67
2128.4	-45.45
2128.45	-41.98
2128.5	-41.09
2128.55	-42.29
2128.6	-44.82
2128.65	-44.42
2128.7	-43.45
2128.75	-41.76
2128.8	-43.52
2128.85	-42.98
2128.9	-43.53
2128.95	-44.08
2129	-44.28
2129.05	-44.32
2129.1	-42.26
2129.15	-43.63
2129.2	-41.53
2129.25	-42.51
2129.3	-43.51
2129.35	-41.1
2129.4	-41.83
2129.45	-43.06
2129.5	-44.31
2129.55	-42.56
2129.6	-39.58
2129.65	-39.78
2129.7	-42.26
2129.75	-42.36
2129.8	-44.44
2129.85	-41.11
2129.9	-40.8
2129.95	-44.37
2130	-42.59

## Sheet: Chemistry
%Depth(m)	Sulfate(ppb)	Conductivity(microS/cm)	ECM(arb.unit)	DEP(arb.unit)
2105	123.397	1.0205	0.000391885	41.5011
2105	118.69	1.1185	0.000434098	41.5668
2105	112.725	1.194	0.000455219	41.6326
2105	108.636	1.2445	0.000419222	41.6983
2105.01	113.348	1.267	0.000421735	41.764
2105.01	112.089	1.2685	0.000426153	41.9965
2105.01	107.685	1.26	0.000426721	42.229
2105.01	105.165	1.223	0.000393888	42.4615
2105.01	101.384	1.179	0.000395587	42.694
2105.01	96.3372	1.132	0.000366535	42.9265
2105.01	91.9159	1.083	0.000329618	43.3154
2105.01	88.4373	1.044	0.000298484	43.7044
2105.01	83.6913	1.003	0.000308096	44.0933
2105.01	85.9034	0.9705	0.000322186	44.4823
2105.01	81.3446	0.952	0.00032	44.8712
2105.02	84.4106	0.933	0.000345615	45.2263
2105.02	87.4769	0.942	0.000387544	45.5814
2105.02	92.8455	0.989	0.000445466	45.9366
2105.02	98.2051	1.125	0.000522172	46.2917
2105.02	108.909	1.279	0.000781569	46.6468
2105.02	110.165	1.389	0.00121197	46.7735
2105.02	113.304	1.568	0.00161926	46.9002
2105.02	124.593	1.764	0.00168854	47.0268
2105.02	133.975	1.869	0.00195244	47.1535
2105.03	139.281	1.924	0.00208202	47.2802
2105.03	140.215	1.946	0.0020876	47.054
2105.03	150.493	1.942	0.00196438	46.8279
2105.03	152.669	1.929	0.00170951	46.6017
2105.03	158.571	1.928	0.0014686	46.3756
2105.03	157.015	1.944	0.00126086	46.1494
2105.03	164.46	1.979	0.00110815	45.6632
2105.03	168.178	2.01	0.000968526	45.1769
2105.03	165.696	2.0365	0.000886079	44.6907
2105.03	167.553	2.034	0.000835814	44.2044
2105.03	161.97	2.002	0.00090738	43.7182
2105.04	159.173	1.9275	0.00103335	43.2853
2105.04	155.754	1.854	0.0011666	42.8523
2105.04	150.155	1.796	0.00132592	42.4194
2105.04	142.053	1.6975	0.00149098	41.9864
2105.04	135.809	1.598	0.0016952	41.5535
2105.04	128.616	1.4905	0.00179872	41.3106
2105.04	122.351	1.348	0.00176041	41.0677
2105.04	116.39	1.254	0.00180322	40.8247
2105.04	108.217	1.1605	0.00158267	40.5818
2105.05	105.699	1.079	0.00129363	40.3389
2105.05	103.808	1.0205	0.00105561	40.2011
2105.05	102.546	0.972	0.000969754	40.0634
2105.05	100.022	0.961	0.00103214	39.9256
2105.05	103.143	0.963	0.000978802	39.7879
2105.05	94.9715	0.97	0.00102999	39.6501
2105.05	92.1279	0.9865	0.00110586	39.5564
2105.05	93.0727	1.013	0.00126967	39.4627
2105.05	94.0171	1.03	0.00140742	39.369
2105.05	89.9093	1.051	0.00155284	39.2753
2105.05	92.7488	1.0595	0.00170299	39.1816
2105.06	95.5874	1.06	0.0018519	39.1313
2105.06	96.2158	1.05	0.00205092	39.081
2105.06	103.461	1.025	0.00218686	39.0306
2105.06	107.55	1.016	0.0021302	38.9803
2105.06	111.95	1.014	0.00185867	38.93
2105.06	118.224	1.028	0.00174401	38.8525
2105.06	126.371	1.079	0.00145548	38.775
2105.06	130.123	1.131	0.00117418	38.6974
2105.06	138.869	1.177	0.00108903	38.6199
2105.07	144.791	1.241	0.00108737	38.5424
2105.07	147.902	1.3065	0.00114806	38.5028
2105.07	152.567	1.328	0.00124634	38.4633
2105.07	152.254	1.3435	0.00133763	38.4237
2105.07	150.074	1.337	0.00159315	38.3842
2105.07	148.826	1.315	0.0019564	38.3446
2105.07	148.201	1.295	0.00239047	38.3378
2105.07	147.576	1.2525	0.00281672	38.331
2105.07	144.458	1.212	0.0030383	38.3242
2105.07	145.079	1.1685	0.00309597	38.3174
2105.07	145.387	1.112	0.00306398	38.3106
2105.08	143.203	1.079	0.00294113	38.2656
2105.08	147.563	1.071	0.00305563	38.2206
2105.08	154.716	1.089	0.00309098	38.1755
2105.08	155.334	1.1665	0.00304766	38.1305
2105.08	159.99	1.259	0.00303128	38.0855
2105.08	160.609	1.3465	0.00306776	38.0098
2105.08	156.88	1.428	0.00305608	37.9341
2105.08	162.155	1.4755	0.00305321	37.8585
2105.08	161.842	1.5	0.00314803	37.7828
2105.09	156.871	1.485	0.00302518	37.7071
2105.09	148.785	1.452	0.00272654	37.7034
2105.09	150.649	1.3915	0.00239585	37.6997
2105.09	140.365	1.315	0.00205461	37.696
2105.09	135.056	1.256	0.00154641	37.6923
2105.09	134.43	1.213	0.00132982	37.6886
2105.09	130.05	1.1555	0.0011606	37.8047
2105.09	118.772	1.0855	0.00106469	37.9208
2105.09	109.978	1.037	0.001057	38.0368
2105.09	106.516	0.9875	0.00113071	38.1529
2105.09	103.681	0.944	0.00125059	38.269
2105.1	101.474	0.906	0.0012726	38.4769
2105.1	96.1121	0.871	0.00132174	38.6848
2105.1	92.6381	0.8445	0.00133852	38.8927
2105.1	94.2139	0.82	0.0015152	39.1006
2105.1	89.7902	0.799	0.00168099	39.3085
2105.1	85.362	0.778	0.00173674	39.4811
2105.1	85.9125	0.777	0.00180981	39.6537
2105.1	86.622	0.788	0.00175339	39.8263
2105.1	84.4054	0.8175	0.00167016	39.9989
2105.11	84.1478	0.8645	0.00165	40.1715
2105.11	87.2459	0.906	0.00159442	40.291
2105.11	90.4035	0.946	0.00152275	40.4105
2105.11	91.6646	0.98	0.00143605	40.5299
2105.11	95.7654	1.0245	0.00116295	40.6494
2105.11	98.6012	1.065	0.000878106	40.7689
2105.11	98.9139	1.089	0.000705847	40.926
2105.11	102.377	1.114	0.000633329	41.0831
2105.11	101.115	1.1185	0.000604549	41.2403
2105.11	95.4363	1.117	0.000591842	41.3974
2105.11	95.434	1.113	0.000519181	41.5545
2105.12	99.2165	1.104	0.000431619	41.7814
2105.12	96.6911	1.078	0.000453497	42.0083
2105.12	96.0571	1.0565	0.000542077	42.2351
2105.12	96.0548	1.025	0.000702515	42.462
2105.12	95.7367	1.0095	0.000715615	42.6889
2105.12	100.464	1.009	0.000863074	42.8963
2105.12	106.758	1.04	0.000797131	43.1036
2105.12	107.385	1.098	0.000701742	43.311
2105.12	117.748	1.1955	0.000500286	43.5183
2105.12	123.076	1.306	0.00032	43.7257
2105.13	120.251	1.4105	0.000288115	43.8746
2105.13	111.776	1.506	0.000262295	44.0235
2105.13	123.064	1.574	0.000257131	44.1724
2105.13	133.704	1.614	0.000266926	44.3213
2105.13	138.697	1.6335	0.000302602	44.4702
2105.13	143.684	1.6155	0.000389366	44.6616
2105.13	142.435	1.588	0.000409918	44.853
2105.13	144.302	1.542	0.000383176	45.0445
2105.13	144.3	1.504	0.000368648	45.2359
2105.14	141.804	1.471	0.000458364	45.4273
2105.14	143.672	1.457	0.000722004	45.6517
2105.14	143.669	1.4585	0.000825861	45.8761
2105.14	146.782	1.47	0.00060251	46.1005
2105.14	144.91	1.498	0.000496557	46.3249
2105.14	142.415	1.508	0.000335603	46.5493
2105.14	141.788	1.5115	0.00033916	46.8137
2105.14	140.538	1.514	0.000306844	47.0782
2105.14	143.965	1.508	0.00029082	47.3426
2105.14	146.766	1.4825	0.000255287	47.6071
2105.14	143.648	1.456	0.000242454	47.8715
2105.15	146.761	1.443	0.000180328	48.0619
2105.15	148.626	1.449	0.00018166	48.2523
2105.15	147.379	1.485	0.000183129	48.4427
2105.15	152.355	1.545	0.000206066	48.6331
2105.15	162.291	1.628	0.000235041	48.8235
2105.15	172.822	1.708	0.000257398	48.7554
2105.15	178.693	1.7855	0.000279775	48.6873
2105.15	185.79	1.859	0.000255328	48.6191
2105.15	195.642	1.945	0.000356994	48.551
2105.16	203.63	2.044	0.000329652	48.4829
2105.16	219.25	2.1585	0.000428279	48.1827
2105.16	235.725	2.32	0.000532169	47.8825
2105.16	242.113	2.426	0.000640922	47.5822
2105.16	246.06	2.4925	0.000761366	47.282
2105.16	251.824	2.529	0.000884536	46.9818
2105.16	254.246	2.522	0.00100303	46.6075
2105.16	253.638	2.487	0.00107688	46.2332
2105.16	258.482	2.434	0.00110352	45.859
2105.16	252.42	2.357	0.00124767	45.4847
2105.16	247.259	2.2715	0.00131414	45.1104
2105.17	242.7	2.178	0.00132516	44.8413
2105.17	237.83	2.0895	0.00142623	44.5723
2105.17	231.738	2.004	0.00147804	44.3032
2105.17	223.802	1.9135	0.00166675	44.0342
2105.17	211.562	1.7995	0.00157844	43.7651
2105.17	199.287	1.714	0.00131169	43.681
2105.17	193.749	1.634	0.00111251	43.5969
2105.17	190.668	1.555	0.00100786	43.5127
2105.17	177.399	1.4875	0.0008	43.4286
2105.18	173.378	1.423	0.000770697	43.3445
2105.18	165.634	1.3575	0.000685261	43.3818
2105.18	159.117	1.288	0.000640164	43.4191
2105.18	154.145	1.248	0.000596847	43.4563
2105.18	149.165	1.211	0.00051835	43.4936
2105.18	139.191	1.195	0.000516397	43.5309
2105.18	137.941	1.19	0.000472825	43.5327
2105.18	138.251	1.204	0.000501178	43.5345
2105.18	134.188	1.239	0.000515691	43.5363
2105.18	139.805	1.291	0.00055	43.5381
2105.18	145.102	1.372	0.000611617	43.5399
2105.19	149.148	1.486	0.000727131	43.4719
2105.19	147.9	1.603	0.000853316	43.4039
2105.19	154.119	1.724	0.00102721	43.3358
2105.19	155.981	1.785	0.00138394	43.2678
2105.19	155.978	1.806	0.00149	43.1998
2105.19	158.46	1.806	0.00146314	43.145
2105.19	152.865	1.7805	0.0011431	43.0902
2105.19	157.834	1.743	0.000879523	43.0355
2105.19	156.278	1.686	0.000681885	42.9807
2105.2	152.235	1.627	0.000627011	42.9259
2105.2	151.61	1.5555	0.000579078	42.8383
2105.2	149.742	1.496	0.000542201	42.7507
2105.2	149.739	1.449	0.000500041	42.6631
2105.2	144.754	1.412	0.000473173	42.5755
2105.2	150.356	1.411	0.00046751	42.4879
2105.2	150.664	1.432	0.000472774	42.249
2105.2	150.973	1.457	0.00050782	42.0101
2105.2	154.701	1.491	0.000515123	41.7711
2105.2	156.563	1.513	0.000603337	41.5322
2105.2	154.074	1.544	0.000713607	41.2933
2105.21	150.34	1.558	0.000955926	40.9877
2105.21	151.893	1.558	0.00115397	40.682
2105.21	150.646	1.534	0.00165591	40.3764
2105.21	148.465	1.502	0.00190246	40.0707
2105.21	147.84	1.466	0.00204681	39.7651
2105.21	141.605	1.404	0.00197593	39.5478
2105.21	134.112	1.314	0.00199676	39.3305
2105.21	129.108	1.245	0.00187702	39.1131
2105.21	122.843	1.176	0.00184457	38.8958
2105.22	117.198	1.11	0.0018118	38.6785
2105.22	113.115	1.053	0.00180434	38.5829
2105.22	107.769	1.002	0.00184664	38.4873
2105.22	103.046	0.9555	0.00189643	38.3916
2105.22	103.989	0.921	0.00192268	38.296
2105.22	95.1615	0.89	0.0018754	38.2004
2105.22	92.6334	0.8675	0.00187609	38.2149
2105.22	91.9995	0.853	0.00183102	38.2295
2105.22	90.7345	0.841	0.00207754	38.244
2105.22	84.6909	0.8285	0.00205297	38.2586
2105.22	84.2839	0.8205	0.00209498	38.2731
2105.23	84.4039	0.809	0.00222939	38.3951
2105.23	73.3725	0.7895	0.00242956	38.517
2105.23	71.7529	0.775	0.00276087	38.639
2105.23	72.9623	0.761	0.00278992	38.7609
2105.23	60.0062	0.7325	0.00262693	38.8829
2105.23	58.7879	0.724	0.00247428	39.1703
2105.23	56.7568	0.7175	0.00235676	39.4578
2105.23	50.6681	0.707	0.00244263	39.7452
2105.23	49.8529	0.697	0.00237	40.0327
2105.24	44.9746	0.691	0.00237	40.3201
2105.24	47.0032	0.692	0.00191299	40.6198
2105.24	40.0873	0.703	0.00151373	40.9194
2105.24	47.402	0.72	0.00115327	41.2191
2105.24		0.729	0.000942866	41.5187
2105.24		0.776	0.000699386	41.8184
2105.24		0.83	0.000636281	41.9354
2105.24		0.8945	0.000529417	42.0523
2105.24	61.9867	0.9945	0.000514536	42.1693
2105.24	78.1638	1.081	0.000462876	42.2862
2105.24	90.6772	1.138	0.000424658	42.4032
2105.25	93.5164	1.234	0.000458864	42.3506
2105.25	107.692	1.316	0.000462869	42.2981
2105.25	109.261	1.381	0.000450481	42.2455
2105.25	110.202	1.428	0.00048809	42.193
2105.25	112.085	1.4515	0.00055	42.1404
2105.25	110.825	1.446	0.00067607	42.1436
2105.25	113.65	1.411	0.00086603	42.1468
2105.25	112.705	1.366	0.00117721	42.15
2105.25	107.045	1.32	0.00140721	42.1532
2105.26	109.558	1.264	0.0014848	42.1564
2105.26	106.411	1.203	0.00141546	42.3227
2105.26	102.001	1.145	0.00133891	42.489
2105.26	103.888	1.114	0.00127558	42.6554
2105.26	104.515	1.11	0.0011115	42.8217
2105.26	103.253	1.1355	0.00089082	42.988
2105.26	106.398	1.18	0.000829426	43.1938
2105.26	104.822	1.2255	0.000738989	43.3996
2105.26	104.503	1.2625	0.000676339	43.6053
2105.26	109.534	1.272	0.00064	43.8111
2105.26	107.017	1.275	0.00064	44.0169
2105.27	111.101	1.2935	0.00059749	44.1051
2105.27	122.707	1.3275	0.000512814	44.1933
2105.27	132.093	1.381	0.000462705	44.2816
2105.27	138.338	1.439	0.000371762	44.3698
2105.27	145.192	1.5395	0.000340409	44.458
2105.27	158.251	1.706	0.000326612	44.3715
2105.27	167.555	1.843	0.000305921	44.285
2105.27	179.922	1.9665	0.000294025	44.1984
2105.27	186.709	2.057	0.000276967	44.1119
2105.28	188.557	2.092	0.000284666	44.0254
2105.28	192.25	2.107	0.000301571	43.9372
2105.28	198.091	2.084	0.000381228	43.849
2105.28	194.091	2.035	0.000446885	43.7609
2105.28	188.546	1.9545	0.00058591	43.6727
2105.28	191.008	1.863	0.000725198	43.5845
2105.28	188.232	1.7735	0.000856093	43.4854
2105.28	181.136	1.695	0.000962128	43.3863
2105.28	178.355	1.642	0.000844399	43.2872
2105.28	176.807	1.609	0.00068681	43.1881
2105.28	171.547	1.605	0.000537377	43.089
2105.29	169.378	1.606	0.000430887	42.9049
2105.29	164.728	1.6075	0.000424829	42.7207
2105.29	165.036	1.606	0.000365683	42.5366
2105.29	165.963	1.6035	0.000341288	42.3524
2105.29	164.411	1.598	0.000352602	42.1683
2105.29	158.824	1.5865	0.000360218	41.9704
2105.29	157.58	1.574	0.000417104	41.7725
2105.29	158.509	1.5605	0.000465027	41.5746
2105.29	156.953	1.548	0.00052	41.3767
2105.3	150.734	1.521	0.000566189	41.1788
2105.3	148.242	1.503	0.000576958	41.0465
2105.3	143.256	1.4635	0.000604877	40.9141
2105.3	137.638	1.3975	0.000638554	40.7818
2105.3	131.389	1.342	0.000704079	40.6494
2105.3	123.562	1.2865	0.000785984	40.5171
2105.3	120.74	1.221	0.000865266	40.489
2105.3	110.38	1.1535	0.000964467	40.4609
2105.3	106.29	1.089	0.00109387	40.4329
2105.3	98.0988	1.0325	0.00123825	40.4048
2105.3	93.6811	0.971	0.00127918	40.3767
2105.31	84.199	0.928	0.0013768	40.3982
2105.31	78.7672	0.882	0.00126936	40.4197
2105.31	76.7449	0.858	0.000998689	40.4412
2105.31	75.5299	0.827	0.000883361	40.4627
2105.31	68.251	0.8145	0.000752538	40.4842
2105.31		0.7905	0.000704303	40.4707
2105.31		0.783	0.000675738	40.4572
2105.31		0.781	0.000649509	40.4436
2105.31		0.786	0.000625717	40.4301
2105.32		0.7975	0.000610805	40.4166
2105.32		0.812	0.000624454	40.3878
2105.32		0.822	0.00058	40.3589
2105.32		0.852	0.000679365	40.3301
2105.32		0.893	0.000772076	40.3012
2105.32		0.942	0.000745621	40.2724
2105.32		0.993	0.000755437	40.2776
2105.32	57.6806	1.039	0.000808226	40.2828
2105.32	55.6499	1.0655	0.00078	40.288
2105.32	61.7253	1.069	0.000794025	40.2932
2105.32	62.5324	1.068	0.000831004	40.2984
2105.33	66.173	1.057	0.000893574	40.3926
2105.33	68.193	1.03	0.00118132	40.4868
2105.33	73.0418	1.0135	0.00139292	40.5809
2105.33	73.8472	1	0.00158832	40.6751
2105.33	77.8833	1.002	0.00150773	40.7693
2105.33	84.2895	1.0225	0.0013935	40.8685
2105.33	86.6609	1.062	0.00119381	40.9676
2105.33	93.607	1.095	0.000990656	41.0668
2105.33	103.062	1.149	0.000877055	41.1659
2105.34	107.15	1.214	0.000703607	41.2651
2105.34	109.349	1.288	0.000584898	41.2819
2105.34	121.273	1.3685	0.000492664	41.2987
2105.34	131.287	1.4925	0.000421023	41.3156
2105.34	135.034	1.576	0.000408186	41.3324
2105.34	147.815	1.6415	0.0004	41.3492
2105.34	150.614	1.693	0.000361569	41.2871
2105.34	148.121	1.711	0.000376639	41.225
2105.34	154.961	1.723	0.000390246	41.1628
2105.34	158.065	1.7135	0.00039	41.1007
2105.34	157.751	1.6965	0.000422541	41.0386
2105.35	161.163	1.668	0.000497108	40.8889
2105.35	162.091	1.656	0.000494973	40.7392
2105.35	161.778	1.654	0.000520914	40.5894
2105.35	163.016	1.6595	0.000595014	40.4397
2105.35	166.733	1.688	0.000644044	40.29
2105.35	165.181	1.7155	0.000568689	40.0195
2105.35	163.629	1.752	0.000429741	39.749
2105.35	163.936	1.792	0.000346086	39.4784
2105.35	161.142	1.839	0.000300164	39.2079
2105.36	159.277	1.849	0.000287955	38.9374
2105.36	156.792	1.849	0.000228238	38.6819
2105.36	153.993	1.825	0.00022544	38.4263
2105.36	145.588	1.7475	0.000216844	38.1708
2105.36	141.223	1.678	0.000229262	37.9152
2105.36	136.539	1.59	0.00022123	37.6597
2105.36	131.227	1.496	0.000243115	37.4735
2105.36	129.035	1.4	0.000265839	37.2873
2105.36	125.591	1.31	0.00034	37.1012
2105.36	117.44	1.229	0.000457131	36.915
2105.36	114.3	1.152	0.000553272	36.7288
2105.37	111.784	1.0975	0.000820676	36.5524
2105.37	102.975	1.0665	0.000909306	36.376
2105.37	104.861	1.068	0.00105213	36.1997
2105.37	105.173	1.0965	0.00120135	36.0233
2105.37	102.338	1.127	0.0013324	35.8469
2105.37	101.705	1.1585	0.00127115	35.67
2105.37	105.481	1.169	0.00112725	35.4931
2105.37	105.793	1.167	0.000989262	35.3163
2105.37	103.587	1.158	0.00074317	35.1394
2105.38	106.731	1.1275	0.00063	34.9625
2105.38	104.212	1.107	0.00059925	34.7874
2105.38	103.894	1.0725	0.000598839	34.6122
2105.38	105.465	1.036	0.000614262	34.4371
2105.38	101.684	1.01	0.000683361	34.2619
2105.38	103.571	0.9805	0.000720779	34.0868
2105.38	105.457	0.968	0.000861514	33.7681
2105.38	104.195	0.958	0.000983525	33.4494
2105.38	106.08	0.9485	0.00102078	33.1306
2105.38	107.965	0.957	0.00104514	32.8119
2105.39	109.848	0.976	0.00103986	32.4932
2105.39	114.872	1.017	0.00087771	31.7253
2105.39	121.455	1.072	0.000784693	30.9575
2105.39	122.392	1.161	0.000892265	30.1896
2105.39	124.895	1.275	0.000663852	29.4218
2105.39	124.892	1.369	0.000496844	28.6539
2105.39	125.829	1.4775	0.000521209	27.544
2105.39	119.246	1.628	0.000409221	26.4341
2105.39			0.00035092	25.3242
2105.39			0.000167049	24.2143
2105.39			0.000159265	23.1044
2105.4			0.000245475	25.5927
2105.4			0.000340043	28.0811
2105.4			0.000453505	30.5694
2105.4			0.000575459	33.0578
2105.4			0.000700674	35.5461
2105.4		1.501	0.000844795	36.3368
2105.4		1.449	0.00102972	37.1276
2105.4		1.403	0.00109045	37.9183
2105.4		1.355	0.00109909	38.7091
2105.41		1.313	0.00110832	39.4998
2105.41		1.297	0.00109445	40.2102
2105.41		1.2635	0.0011141	40.9206
2105.41		1.256	0.00107374	41.631
2105.41		1.261	0.00107359	42.3414
2105.41		1.283	0.00112398	43.0518
2105.41		1.316	0.00120746	43.6164
2105.41		1.367	0.00125138	44.181
2105.41	80.5685	1.4625	0.00126162	44.7455
2105.41	89.8849	1.565	0.00127447	45.3101
2105.41	100.448	1.674	0.00129904	45.8747
2105.42	111.61	1.777	0.00118197	46.2287
2105.42	116.54	1.848	0.00105095	46.5828
2105.42	123.612	1.9425	0.000933982	46.9368
2105.42	135.637	2.03	0.000884218	47.2909
2105.42	147.005	2.098	0.000835205	47.6449
2105.42	152.172	2.153	0.000731494	47.8719
2105.42	165.03	2.1995	0.000674975	48.0989
2105.42	171.709	2.234	0.000698158	48.3259
2105.42	177.761	2.245	0.000722968	48.5529
2105.43	186.254	2.258	0.000708996	48.7799
2105.43	188.032	2.267	0.000686827	48.9839
2105.43	190.698	2.277	0.00065498	49.188
2105.43	201.907	2.283	0.000710123	49.392
2105.43	208.521	2.286	0.000785916	49.5961
2105.43	207.217	2.286	0.000815984	49.8001
2105.43	210.477	2.2815	0.000836244	50.0198
2105.43	215.558	2.262	0.000824713	50.2395
2105.43	210.304	2.2335	0.000878231	50.4593
2105.43	209.913	2.19	0.000988689	50.679
2105.43	209.246	2.152	0.00124452	50.8987
2105.44	208.247	2.096	0.00143426	51.2189
2105.44	210.29	2.039	0.00152	51.5391
2105.44	210.507	1.986	0.00150952	51.8594
2105.44	213.156	1.947	0.00146428	52.1796
2105.44	213.099	1.941	0.00136797	52.4998
2105.44	216.656	1.947	0.00121664	52.7816
2105.44	221.425	1.982	0.00118541	53.0635
2105.44	223.763	2.032	0.00112037	53.3453
2105.44	230.944	2.093	0.00101971	53.6272
2105.45	237.204	2.1585	0.000998598	53.909
2105.45	248.278	2.229	0.00094827	53.9545
2105.45	254.84	2.274	0.00084913	54.0001
2105.45	257.759	2.355	0.000904177	54.0456
2105.45	271.469	2.461	0.001	54.0912
2105.45	290.794	2.5795	0.00100201	54.1367
2105.45	293.389	2.711	0.00104296	54.0102
2105.45	299.252	2.835	0.00107034	53.8837
2105.45	305.7	2.922	0.00120439	53.7572
2105.45	307.394	2.9635	0.00133685	53.6307
2105.45	307.307	2.952	0.0014152	53.5042
2105.46	306.656	2.912	0.00147133	53.4587
2105.46	303.304	2.825	0.00156931	53.4133
2105.46	296.382	2.703	0.00184777	53.3678
2105.46	290.043	2.564	0.00169869	53.3224
2105.46	281.307	2.429	0.00161679	53.2769
2105.46	267.761	2.2985	0.00148608	53.3969
2105.46	261.378	2.192	0.00120018	53.5169
2105.46	253.18	2.1135	0.000925926	53.6368
2105.46	246.172	2.054	0.00126578	53.7568
2105.47	244.277	2.029	0.00113612	53.8768
2105.47	243.588	2.011	0.000880604	53.9301
2105.47	236.562	2.029	0.000723801	53.9834
2105.47	233.758	2.06	0.00068	54.0367
2105.47	234.274	2.132	0.000642193	54.09
2105.47	239.019	2.229	0.000637799	54.1433
2105.47	240.742	2.3295	0.000656086	54.0149
2105.47	242.465	2.422	0.00066	53.8865
2105.47	239.966	2.4765	0.000634452	53.7581
2105.47	237.465	2.495	0.000656281	53.6297
2105.47	235.869	2.4875	0.000633009	53.5013
2105.48	234.272	2.457	0.000750143	53.3673
2105.48	231.463	2.3845	0.000775168	53.2334
2105.48	225.632	2.294	0.00086668	53.0994
2105.48	219.79	2.191	0.00104923	52.9655
2105.48	215.154	2.079	0.00118622	52.8315
2105.48	210.815	1.973	0.0013869	52.9206
2105.48	206.474	1.875	0.00167474	53.0097
2105.48	204.866	1.8025	0.0018426	53.0988
2105.48	203.258	1.745	0.00199242	53.1879
2105.49	198.907	1.7075	0.00207251	53.277
2105.49	197.602	1.698	0.00186039	53.4214
2105.49	196.296	1.695	0.00170534	53.5657
2105.49	199.866	1.699	0.00151697	53.7101
2105.49	204.649	1.7085	0.00149029	53.8544
2105.49	208.213	1.744	0.00147106	53.9988
2105.49	214.807	1.7905	0.00157753	53.9195
2105.49	221.391	1.867	0.00159192	53.8402
2105.49	225.845	1.98	0.00156504	53.761
2105.49	232.712	2.111	0.00153946	53.6817
2105.49	238.963	2.251	0.00160561	53.6024
2105.5	242.795	2.376	0.0015846	53.2123
2105.5	249.931	2.4715	0.00154458	52.8221
2105.5	250.447	2.538	0.00153548	52.432
2105.5	258.169	2.584	0.00154428	52.0418
2105.5	261.084	2.612	0.00153	51.6517
2105.5	253.794	2.609	0.00164673	51.1821
2105.5	257.911	2.581	0.00182933	50.7124
2105.5	250.315	2.5285	0.00206453	50.2428
2105.5	244.482	2.4265	0.00232318	49.7731
2105.51	240.179	2.318	0.00260663	49.3035
2105.51	236.502	2.248	0.00254277	48.9573
2105.51	227.355	2.1385	0.00267689	48.6111
2105.51	222.398	2.028	0.00249225	48.2648
2105.51	221.706	1.99	0.00213066	47.9186
2105.51	219.196	2.0075	0.00171486	47.5724
2105.51	219.716	2.073	0.00149247	47.2954
2105.51	212.047	2.184	0.00132545	47.0184
2105.51	206.799	2.286	0.00119942	46.7414
2105.51	201.238	2.3495	0.00113689	46.4644
2105.51	206.018	2.374	0.0011948	46.1874
2105.52	202.586	2.3315	0.00130148	45.9561
2105.52	197.324	2.272	0.00131393	45.7248
2105.52	194.189	2.188	0.00143997	45.4934
2105.52	189.834	2.104	0.0016606	45.2621
2105.52	184.555	2.034	0.00211079	45.0308
2105.52	171.307	1.974	0.00218147	44.8754
2105.52	170.914	1.913	0.00247221	44.7201
2105.52	170.521	1.857	0.00253302	44.5647
2105.52	169.82	1.8055	0.00245529	44.4094
2105.53	160.186	1.721	0.00218899	44.254
2105.53	158.562	1.656	0.00174575	44.2494
2105.53	154.474	1.5855	0.00130802	44.2448
2105.53	146.685	1.509	0.00091082	44.2403
2105.53	144.747	1.443	0.000662559	44.2357
2105.53	143.426	1.382	0.000504754	44.2311
2105.53	144.574	1.3495	0.000460246	44.3157
2105.53	143.253	1.341	0.000410553	44.4002
2105.53	145.018	1.367	0.00043958	44.4848
2105.53	150.481	1.415	0.000430656	44.5693
2105.53	155.014	1.479	0.000439099	44.6539
2105.54	160.156	1.539	0.000434549	44.8078
2105.54	162.835	1.598	0.000471382	44.9617
2105.54	161.212	1.645	0.000491332	45.1155
2105.54	166.345	1.6565	0.000557451	45.2694
2105.54	170.246	1.66	0.000621506	45.4233
2105.54	165.559	1.6535	0.000770471	45.7432
2105.54	163.294	1.6125	0.00094738	46.0631
2105.54	161.365	1.56	0.00127425	46.3831
2105.54	156.389	1.519	0.00176341	46.703
2105.55	149.529	1.466	0.00227	47.0229
2105.55	154.369	1.405	0.00231251	47.5408
2105.55	144.727	1.347	0.00240634	48.0587
2105.55	137.823	1.2875	0.00232391	48.5767
2105.55	136.81	1.257	0.00230426	49.0946
2105.55	136.105	1.252	0.00211659	49.6125
2105.55	138.491	1.285	0.00173783	49.9618
2105.55	138.094	1.373	0.00148539	50.3111
2105.55	144.492	1.51	0.00132738	50.6603
2105.55	147.796	1.67	0.00141942	51.0096
2105.55	157.868	1.832	0.00149592	51.3589
2105.56	165.765	1.9915	0.00171016	51.1146
2105.56	171.197	2.134	0.00194752	50.8703
2105.56	177.538	2.2615	0.00222895	50.626
2105.56	188.143	2.371	0.00257975	50.3817
2105.56	186.531	2.4555	0.00305183	50.1374
2105.56	188.58	2.509	0.00320286	49.4789
2105.56	193.066	2.524	0.0032738	48.8204
2105.56	193.284	2.491	0.00338385	48.162
2105.56	187.404	2.429	0.00344145	47.5035
2105.57	186.985	2.2925	0.00336299	46.845
2105.57	178.959	2.169	0.0032466	46.2216
2105.57	167.881	2.083	0.00310646	45.5983
2105.57	162.885	1.9465	0.00326072	44.9749
2105.57	154.474	1.765	0.00329275	44.3516
2105.57	149.156	1.635	0.00355306	43.7282
2105.57	139.815	1.513	0.00342734	43.2826
2105.57	135.409	1.4	0.00328539	42.837
2105.57	139.337	1.32	0.0031748	42.3915
2105.57	133.999	1.268	0.00294052	41.9459
2105.57	135.458	1.261	0.00255992	41.5003
2105.58	135.681	1.269	0.00220418	41.1575
2105.58	134.358	1.2995	0.0018741	40.8148
2105.58	133.653	1.312	0.00183219	40.472
2105.58	132.639	1.3125	0.00191415	40.1293
2105.58	126.054	1.312	0.0018732	39.7865
2105.58	125.657	1.299	0.00200992	39.5295
2105.58	124.303	1.254	0.00235984	39.2724
2105.58	114.6	1.214	0.00282103	39.0154
2105.58	107.674	1.1695	0.00332738	38.7583
2105.59	114.427	1.119	0.00315164	38.5013
2105.59	106.255	1.0785	0.00271932	38.3526
2105.59	99.3171	1.033	0.00279971	38.204
2105.59	97.9833	0.9875	0.00288557	38.0553
2105.59	92.9038	0.945	0.00294365	37.9067
2105.59	88.7557	0.909	0.00259632	37.758
2105.59	83.8485	0.871	0.00233744	37.7099
2105.59	78.4021	0.854	0.00198792	37.6617
2105.59	75.1327	0.839	0.00176387	37.6136
2105.59	74.2232	0.827	0.00163918	37.5654
2105.59	69.6774	0.823	0.00156238	37.5173
2105.6	67.567	0.822	0.00159164	37.5223
2105.6	64.6543	0.824	0.00143443	37.5273
2105.6	63.3431	0.831	0.00131991	37.5323
2105.6	59.2256	0.8575	0.00127496	37.5373
2105.6	55.1061	0.874	0.00121602	37.5423
2105.6	57.0011	0.8995	0.00121	37.5889
2105.6	55.688	0.92	0.00104891	37.6355
2105.6	52.368	0.934	0.000942815	37.6821
2105.6	52.2579	0.952	0.000804044	37.7287
2105.61	48.5343	0.9585	0.000713818	37.7753
2105.61	46.4156	0.955	0.000688238	37.8893
2105.61	46.7064	0.94	0.000664243	38.0032
2105.61	44.953	0.9225	0.000677896	38.1172
2105.61	42.0289	0.913	0.000669262	38.2311
2105.61	45.1712	0.896	0.000732524	38.3451
2105.61	45.8644	0.8775	0.000688962	38.5433
2105.61	40.0896	0.872	0.000771678	38.7415
2105.61	44.0002	0.874	0.00101332	38.9398
2105.61	45.8992	0.9	0.00135696	39.138
2105.61	43.7799	0.933	0.00165369	39.3362
2105.62	45.6785	0.985	0.00205902	39.5592
2105.62	49.986	1.045	0.00219251	39.7822
2105.62	51.481	1.1015	0.00195869	40.0052
2105.62	55.3822	1.17	0.00161578	40.2282
2105.62	62.8836	1.2385	0.00133704	40.4512
2105.62	67.1762	1.305	0.0011234	40.6079
2105.62	71.0644	1.3625	0.00106855	40.7646
2105.62	79.7396	1.428	0.00120231	40.9213
2105.62	83.9648	1.487	0.00125882	41.078
2105.62	92.5137	1.567	0.00147333	41.2347
2105.63	100.222	1.65	0.0018905	41.2209
2105.63	107.291	1.753	0.0023518	41.2071
2105.63	115.59	1.864	0.0027944	41.1933
2105.63	123.868	1.965	0.00304746	41.1795
2105.63	120.997	2.043	0.0030874	41.1657
2105.63	125.553	2.086	0.00296884	40.9687
2105.63	130.106	2.099	0.0029009	40.7718
2105.63	130.947	2.0965	0.00307734	40.5748
2105.63	126.223	2.08	0.00312987	40.3779
2105.64	126.136	2.027	0.00313959	40.1809
2105.64	126.05	1.96	0.00355981	39.9376
2105.64	122.25	1.8695	0.00351545	39.6944
2105.64	119.657	1.7355	0.00340381	39.4511
2105.64	115.851	1.635	0.0033053	39.2079
2105.64	111.421	1.5405	0.00316103	38.9646
2105.64	110.713	1.468	0.00270673	38.7864
2105.64	104.723	1.4095	0.0023504	38.6082
2105.64	98.7242	1.36	0.00212271	38.4299
2105.64	93.6516	1.315	0.00211059	38.2517
2105.64	89.4803	1.253	0.00224218	38.0735
2105.65	81.0849	1.206	0.0023852	37.957
2105.65	72.5957	1.148	0.00258429	37.8405
2105.65	68.0911	1.098	0.00275473	37.7239
2105.65	60.3801	1.047	0.0025535	37.6074
2105.65	55.0649	0.992	0.00223787	37.4909
2105.65	51.3464	0.944	0.00187532	37.4593
2105.65	44.378	0.886	0.00145299	37.4277
2105.65	42.6626	0.847	0.0012348	37.3962
2105.65	38.5343	0.814	0.00107814	37.3646
2105.66	32.7935	0.779	0.00100208	37.333
2105.66	28.6575	0.759	0.000990061	37.3932
2105.66	26.9362	0.734	0.0010307	37.4534
2105.66	27.2289	0.7265	0.00110336	37.5135
2105.66	23.492	0.723	0.00115263	37.5737
2105.66	29.0226	0.719	0.00127426	37.6339
2105.66	23.2352	0.7225	0.00152038	37.7657
2105.66	20.7058	0.734	0.00187981	37.8975
2105.66	18.9819	0.774	0.00234066	38.0292
2105.66	16.4508	0.819	0.002889	38.161
2105.66	17.9918	0.838	0.00332307	38.2928
2105.67	18.2851	0.87	0.00374927	38.4791
2105.67	23.3811	0.8905	0.00388426	38.6653
2105.67	16.8178	0.911	0.00394258	38.8516
2105.67	22.3543	0.9195	0.00395035	39.0378
2105.67	31.9108	0.926	0.00391916	39.2241
2105.67	33.8118	0.949	0.00416486	39.3639
2105.67	32.8597	0.9735	0.00404546	39.5037
2105.67	44.4032	1.003	0.00387566	39.6436
2105.67	41.9212	1.02	0.00357271	39.7834
2105.68	44.2188	1.053	0.00307442	39.9232
2105.68	50.4902	1.0875	0.00253595	39.9065
2105.68	43.9631	1.117	0.00207287	39.8898
2105.68	43.8531	1.147	0.00190874	39.873
2105.68	47.7181	1.1695	0.00198194	39.8563
2105.68	41.9908	1.175	0.00158063	39.8396
2105.68	38.7047	1.17	0.00152125	39.7635
2105.68	40.2013	1.1605	0.00152264	39.6874
2105.68	38.447	1.1235	0.00150215	39.6113
2105.68	33.5151	1.092	0.00161728	39.5352
2105.68	24.5478	1.0565	0.00174741	39.4591
2105.69	14.7642	1.013	0.00192189	39.5034
2105.69	16.6717	0.9705	0.00226587	39.5478
2105.69	20.5573	0.9185	0.00273534	39.5921
2105.69	16.0116	0.878	0.00329938	39.6365
2105.69	18.3585	0.866	0.00390565	39.6808
2105.69	16.6341	0.832	0.00383194	39.8617
2105.69	18.505	0.8015	0.00390922	40.0426
2105.69	13.9576	0.776	0.00387419	40.2236
2105.69	18.2851	0.7715	0.00372266	40.4045
2105.7	20.1909	0.774	0.00341118	40.5854
2105.7	21.7296	0.789	0.0032755	40.7313
2105.7	22.0218	0.8385	0.0033157	40.8773
2105.7	35.5559	0.9215	0.00341418	41.0232
2105.7	38.2583	1.004	0.00349106	41.1692
2105.7	46.2104	1.066	0.00352839	41.3151
2105.7	54.9135	1.1575	0.00349563	41.2925
2105.7	63.9633	1.274	0.00340862	41.2698
2105.7	65.8518	1.339	0.00313989	41.2472
2105.7	69.7706	1.373	0.0028553	41.2245
2105.7	74.0475	1.4055	0.00244129	41.2019
2105.71	71.11	1.408	0.00180867	41.1112
2105.71	66.2107	1.38	0.00141592	41.0205
2105.71	66.936	1.357	0.00116203	40.9299
2105.71	66.4268	1.3125	0.00103705	40.8392
2105.71	61.1236	1.262	0.000858004	40.7485
2105.71	52.6134	1.21	0.000804918	40.7901
2105.71	56.1053	1.161	0.000722951	40.8316
2105.71	51.9926	1.1175	0.000753091	40.8732
2105.71	51.0824	1.079	0.000680236	40.9147
2105.72	45.7632	1.062	0.000697298	40.9563
2105.72	42.0451	1.035	0.000722408	41.2204
2105.72	37.1188	1.013	0.000836199	41.4844
2105.72	41.8252	0.986	0.000931228	41.7485
2105.72	34.087	0.968	0.00108308	42.0125
2105.72	33.5761	0.947	0.00123893	42.2766
2105.72	33.0642	0.925	0.00146394	42.7315
2105.72	34.9632	0.918	0.00183066	43.1865
2105.72	34.853	0.9125	0.00229242	43.6414
2105.72	39.5609	0.917	0.00263629	44.0964
2105.72	43.863	0.937	0.00270094	44.5513
2105.73	49.7634	0.982	0.0027657	44.9583
2105.73	56.055	1.0595	0.00244629	45.3652
2105.73	67.9305	1.147	0.00232888	45.7722
2105.73	70.2137	1.253	0.00212092	46.1791
2105.73	82.0538	1.351	0.00194914	46.5861
2105.73	91.6383	1.426	0.00180601	46.6589
2105.73	97.4633	1.5315	0.00174057	46.7317
2105.73	109.455	1.6625	0.00182263	46.8046
2105.73	117.421	1.749	0.00174073	46.8774
2105.74	120.427	1.8365	0.00181904	46.9502
2105.74	124.048	1.913	0.00167641	46.7222
2105.74	130.44	1.9805	0.00172457	46.4941
2105.74	131.896	2.025	0.00169448	46.2661
2105.74	132.118	2.036	0.00154444	46.038
2105.74	134.188	2.008	0.0014862	45.81
2105.74	132.87	1.964	0.00144392	45.6012
2105.74	132.168	1.894	0.00154303	45.3923
2105.74	128.074	1.817	0.00148656	45.1835
2105.74	128.296	1.728	0.00155149	44.9746
2105.74	126.359	1.648	0.00150304	44.7658
2105.75	129.974	1.573	0.0014808	44.7404
2105.75	129.579	1.5205	0.0013289	44.715
2105.75	133.499	1.487	0.00131348	44.6895
2105.75	128.79	1.4595	0.00111716	44.6641
2105.75	129.629	1.452	0.00098	44.6387
2105.75	131.083	1.4465	0.000905722	44.7379
2105.75	128.84	1.445	0.00074459	44.8372
2105.75	132.449	1.4455	0.00068	44.9364
2105.75	139.137	1.445	0.000586906	45.0357
2105.76	137.205	1.446	0.000516803	45.1349
2105.76	135.273	1.445	0.000515763	45.333
2105.76	141.337	1.4445	0.000489836	45.531
2105.76	141.866	1.446	0.000708226	45.7291
2105.76	144.543	1.452	0.0006	45.9271
2105.76	147.834	1.457	0.00061307	46.1252
2105.76	148.39	1.463	0.00069	46.4139
2105.76	148.611	1.4835	0.000770615	46.7026
2105.76	152.481	1.5035	0.00107662	46.9913
2105.76	154.846	1.507	0.00157858	47.28
2105.76	155.984	1.509	0.00178131	47.5687
2105.77	163.238	1.521	0.00203564	47.846
2105.77	172.612	1.572	0.00209859	48.1233
2105.77	176.487	1.645	0.00204214	48.4005
2105.77	179.432	1.743	0.00206784	48.6778
2105.77	198.18	1.866	0.00172928	48.9551
2105.77	204.175	1.964	0.0016929	48.9855
2105.77	227.295	2.1455	0.00163296	49.0159
2105.77	259.512	2.451	0.00153417	49.0464
2105.77	279.955	2.703	0.00141406	49.0768
2105.78	290.561	2.868	0.00113925	49.1072
2105.78	299.929	3.069	0.000900109	48.8044
2105.78		3.2405	0.000759891	48.5015
2105.78		3.292	0.000633934	48.1987
2105.78	299.304	3.2685	0.000520518	47.8958
2105.78	310.755	3.2	0.000519468	47.593
2105.78	302.714	3.0765	0.000479877	47.2162
2105.78	291.704	2.921	0.000577913	46.8393
2105.78	303.129	2.7485	0.000677281	46.4625
2105.78	290.349	2.561	0.000833724	46.0856
2105.78	280.193	2.372	0.00109246	45.7088
2105.79	268.824	2.186	0.00136597	45.5234
2105.79	254.734	2.021	0.00186289	45.3379
2105.79	240.599	1.874	0.0020518	45.1525
2105.79	229.414	1.7595	0.00202289	44.967
2105.79	216.395	1.663	0.00170279	44.7816
2105.79	203.631	1.576	0.00141312	44.7929
2105.79	195.68	1.499	0.00131836	44.8043
2105.79	194.381	1.4355	0.00128564	44.8156
2105.79	185.196	1.385	0.00127387	44.827
2105.8	185.717	1.364	0.00149078	44.8383
2105.8	186.238	1.379	0.00176236	44.8287
2105.8	184.938	1.432	0.00206175	44.8191
2105.8	186.066	1.506	0.00226459	44.8095
2105.8	191.44	1.623	0.00259289	44.7999
2105.8	195.597	1.765	0.00265605	44.7903
2105.8	194.905	1.9175	0.00247821	44.6096
2105.8	196.636	2.049	0.00247002	44.4289
2105.8	196.247	2.126	0.00252742	44.2481
2105.8	191.011	2.162	0.00241369	44.0674
2105.8	192.166	2.155	0.00249559	43.8867
2105.81	191.17	2.119	0.00249649	43.6597
2105.81	184.987	2.0235	0.00265074	43.4328
2105.81	183.384	1.921	0.00278081	43.2058
2105.81	176.914	1.819	0.00278504	42.9789
2105.81	171.044	1.723	0.00261498	42.7519
2105.81	167.605	1.6585	0.00230099	42.5798
2105.81	164.163	1.614	0.00217935	42.4077
2105.81	154.3	1.603	0.0018758	42.2356
2105.81	151.765	1.597	0.00167857	42.0635
2105.82	146.777	1.584	0.00164256	41.8914
2105.82	142.399	1.56	0.00162739	41.7916
2105.82	136.786	1.5355	0.00171748	41.6918
2105.82	133.626	1.507	0.00181816	41.5919
2105.82	126.151	1.476	0.00195141	41.4921
2105.82	119.901	1.447	0.00216054	41.3923
2105.82	114.257	1.4065	0.00250452	41.397
2105.82	116.642	1.37	0.00274816	41.4016
2105.82	101.082	1.3365	0.00271336	41.4063
2105.82	94.1732	1.307	0.00239891	41.4109
2105.82	99.6729	1.2625	0.00209857	41.4156
2105.83	97.726	1.215	0.00174332	41.5247
2105.83	90.4976	1.167	0.00151426	41.6339
2105.83	91.3439	1.117	0.00138538	41.743
2105.83	93.743	1.0835	0.00126253	41.8522
2105.83	93.0359	1.066	0.00126051	41.9613
2105.83	93.8815	1.065	0.00125916	42.1236
2105.83	97.8303	1.074	0.00120178	42.2859
2105.83	94.641	1.1215	0.0012926	42.4481
2105.83	101.379	1.185	0.0013228	42.6104
2105.84	104.081	1.253	0.00130022	42.7727
2105.84	104.924	1.314	0.0015623	42.9537
2105.84	105.457	1.3565	0.00168822	43.1347
2105.84	107.228	1.385	0.00181766	43.3157
2105.84	109.617	1.392	0.00200878	43.4967
2105.84	106.438	1.373	0.00216106	43.6777
2105.84	110.681	1.3485	0.00246713	43.9006
2105.84	116.774	1.314	0.00277154	44.1234
2105.84	117.922	1.304	0.00297631	44.3463
2105.84	124.619	1.298	0.00329526	44.5691
2105.84	128.842	1.311	0.00364447	44.792
2105.85	134.906	1.348	0.00400912	44.8907
2105.85	141.602	1.385	0.00418111	44.9894
2105.85	145.836	1.433	0.00391699	45.088
2105.85	153.095	1.504	0.00365905	45.1867
2105.85	157.288	1.586	0.00342538	45.2854
2105.85	165.441	1.6625	0.00298275	45.1352
2105.85	166.269	1.733	0.00273007	44.985
2105.85	170.752	1.802	0.00246369	44.8347
2105.85	178.269	1.85	0.00233984	44.6845
2105.86	178.819	1.872	0.00233757	44.5343
2105.86	178.126	1.8955	0.00222423	44.2829
2105.86	178.619	1.8945	0.00232251	44.0315
2105.86	174.886	1.878	0.00225241	43.7801
2105.86	168.743	1.853	0.00209293	43.5287
2105.86	166.829	1.819	0.00186644	43.2773
2105.86	163.086	1.758	0.00156684	43.159
2105.86	167.263	1.69	0.00123082	43.0407
2105.86	145.8	1.61	0.000978219	42.9224
2105.86	155.197	1.5235	0.00082041	42.8041
2105.86	136.429	1.441	0.000650205	42.6858
2105.87	123.736	1.358	0.000668309	42.7884
2105.87	115.945	1.298	0.00062	42.891
2105.87	111.536	1.2395	0.000617541	42.9936
2105.87	107.124	1.206	0.000595111	43.0962
2105.87	99.6089	1.1715	0.000644251	43.1988
2105.87	95.1834	1.144	0.000595773	43.5053
2105.87	97.5767	1.118	0.000673545	43.8117
2105.87	95.9132	1.085	0.000689519	44.1182
2105.87	92.4148	1.068	0.000861712	44.4246
2105.88	86.1456	1.062	0.001075	44.7311
2105.88	84.5051	1.0475	0.00148595	45.1282
2105.88	80.3378	1.029	0.00177358	45.5253
2105.88	85.2656	1.024	0.00194329	45.9225
2105.88	88.2878	1.033	0.00191076	46.3196
2105.88	94.0977	1.081	0.0018565	46.7167
2105.88	106.092	1.181	0.00168916	46.9097
2105.88	118.661	1.3605	0.0015782	47.1027
2105.88	134.268	1.602	0.00150408	47.2957
2105.88	149.809	1.8925	0.00175136	47.4887
2105.89	166.508	2.196	0.00174877	47.6817
2105.89	177.672	2.472	0.00183569	47.5244
2105.89	189.412	2.691	0.00186717	47.367
2105.89	195.679	2.8305	0.00170812	47.2097
2105.89	198.312	2.885	0.00181967	47.0523
2105.89	201.849	2.872	0.0017304	46.895
2105.89	198.112	2.7645	0.00181302	46.6209
2105.89	195.609	2.632	0.00184816	46.3468
2105.89	193.738	2.53	0.0017	46.0728
2105.89	188.81	2.371	0.00154954	45.7987
2105.89	180.512	2.16	0.00128042	45.5246
2105.9	169.187	2.02	0.00109978	45.4272
2105.9	168.521	1.928	0.00100077	45.3299
2105.9	157.769	1.811	0.000883449	45.2325
2105.9	144.544	1.705	0.000777869	45.1352
2105.9	138.024	1.61	0.000715988	45.0378
2105.9	130.88	1.519	0.000665123	45.1913
2105.9	120.952	1.442	0.000542237	45.3449
2105.9	112.234	1.37	0.000517923	45.4984
2105.9	108.135	1.3225	0.000501085	45.652
2105.91	101.217	1.272	0.0005	45.8055
2105.91	100.204	1.244	0.000480123	46.2036
2105.91	96.4013	1.2155	0.000502682	46.6016
2105.91	93.8365	1.204	0.00051	46.9997
2105.91	90.9594	1.1775	0.00050434	47.3977
2105.91	83.7319	1.159	0.000494098	47.7958
2105.91	86.4421	1.135	0.00049	48.3339
2105.91	86.6669	1.12	0.000558087	48.872
2105.91	81.9105	1.1185	0.00057	49.4102
2105.91	80.2156	1.124	0.000635486	49.9483
2105.91	84.14	1.15	0.000591998	50.4864
2105.92	87.5654	1.184	0.000666407	50.8989
2105.92	91.5133	1.2345	0.000753531	51.3113
2105.92	90.497	1.296	0.000844365	51.7238
2105.92	95.0609	1.36	0.000860604	52.1362
2105.92	99.0015	1.444	0.00096959	52.5487
2105.92	97.9869	1.522	0.00110454	52.597
2105.92	106.869	1.603	0.00119768	52.6454
2105.92	108.636	1.673	0.00130476	52.6937
2105.92	106.698	1.735	0.0015123	52.7421
2105.93	109.111	1.773	0.00170097	52.7904
2105.93	111.185	1.8265	0.00162207	52.4949
2105.93	114.771	1.8695	0.00152281	52.1994
2105.93	113.761	1.896	0.00133379	51.9039
2105.93	116.169	1.901	0.00111808	51.6084
2105.93	116.083	1.9045	0.00098161	51.3129
2105.93	115.353	1.899	0.000836233	50.8984
2105.93	101.684	1.883	0.00078429	50.4839
2105.93	102.864	1.855	0.00070392	50.0693
2105.93	99.9941	1.8225	0.000687814	49.6548
2105.93	93.378	1.7485	0.000743561	49.2403
2105.94	90.1925	1.693	0.000865697	48.9519
2105.94	85.7913	1.651	0.000985164	48.6634
2105.94	73.6602	1.5875	0.00120334	48.375
2105.94	71.9272	1.505	0.00148468	48.0865
2105.94	71.0241	1.45	0.00176677	47.7981
2105.94	68.5692	1.41	0.00217033	47.6403
2105.94	69.2539	1.365	0.00263538	47.4826
2105.94	73.9067	1.335	0.00273281	47.3248
2105.94	78.9513	1.3175	0.00296164	47.1671
2105.95	83.8628	1.318	0.00232945	47.0093
2105.95	97.4106	1.3445	0.00190844	46.8469
2105.95	101.044	1.38	0.00139693	46.6844
2105.95	113.922	1.4405	0.00108711	46.522
2105.95	110.416	1.523	0.000946899	46.3595
2105.95	111.873	1.577	0.000837994	46.1971
2105.95	116.13	1.604	0.000794098	46.0781
2105.95	117.583	1.617	0.000714761	45.9591
2105.95	118.7	1.6115	0.000717193	45.84
2105.95	117.691	1.599	0.000768117	45.721
2105.95	118.25	1.57	0.000761202	45.602
2105.96	112.927	1.528	0.000804698	45.653
2105.96	112.505	1.4685	0.000913371	45.7039
2105.96	102.544	1.411	0.00103163	45.7549
2105.96	104.93	1.354	0.00127606	45.8058
2105.96	100.518	1.309	0.00165397	45.8568
2105.96	99.8133	1.271	0.00200715	45.9319
2105.96	102.819	1.253	0.00226968	46.007
2105.96	99.6424	1.258	0.00235213	46.0821
2105.96	101.411	1.293	0.00210723	46.1572
2105.97	102.59	1.329	0.00178574	46.2323
2105.97	106.519	1.4155	0.00162396	46.1628
2105.97	105.169	1.5415	0.00152588	46.0933
2105.97	109.095	1.629	0.00148375	46.0238
2105.97	110.272	1.674	0.0017832	45.9543
2105.97	108.335	1.717	0.00181202	45.8848
2105.97	107.912	1.744	0.00165874	45.7813
2105.97	106.901	1.728	0.0018577	45.6778
2105.97	99.0934	1.692	0.00221746	45.5742
2105.97	98.6991	1.643	0.00244649	45.4707
2105.97	98.9225	1.5745	0.00252595	45.3672
2105.98	100.382	1.508	0.00232562	45.3756
2105.98	100.605	1.4585	0.00191915	45.384
2105.98	103.918	1.419	0.00146557	45.3924
2105.98	103.214	1.4145	0.00126082	45.4008
2105.98	102.511	1.437	0.00117803	45.4092
2105.98	106.747	1.4675	0.00107975	45.5335
2105.98	107.278	1.502	0.00107309	45.6577
2105.98	107.809	1.511	0.0011866	45.782
2105.98	104.638	1.515	0.00129697	45.9062
2105.99	107.021	1.5105	0.00137119	46.0305
2105.99	104.466	1.502	0.00149865	46.2517
2105.99	106.849	1.4685	0.00168011	46.4729
2105.99	109.23	1.431	0.0018083	46.6942
2105.99	114.689	1.395	0.00180011	46.9154
2105.99	115.835	1.365	0.00169894	47.1366
2105.99	126.198	1.3695	0.00159247	47.3223
2105.99	132.247	1.41	0.00152962	47.508
2105.99	141.037	1.485	0.00144013	47.6938
2105.99	143.093	1.589	0.00143636	47.8795
2105.99	141.201	1.665	0.00146504	48.0652
2106	142.032	1.7655	0.00153469	48.1626
2106	155.679	1.851	0.00158892	48.2601
2106	162.288	1.8965	0.00152817	48.3575
2106	167.673	1.916	0.00157285	48.455
2106	170.623	1.91	0.00145	48.5524
2106	172.631	1.8985	0.00131548	48.6856
2106	174.062	1.899	0.00111875	48.8188
2106	174.005	1.91	0.000989591	48.952
2106	173.01	1.9415	0.000882056	49.0852
2106.01	174.44	1.973	0.00079041	49.2184
2106.01	172.535	1.992	0.00072781	49.4156
2106.01	170.023	1.995	0.00071668	49.6128
2106.01	169.027	1.9895	0.000703391	49.8099
2106.01	167.423	1.964	0.000731957	50.0071
2106.01	166.426	1.9275	0.00078	50.2043
2106.01	165.401	1.87	0.00083652	50.3699
2106.01	164.708	1.824	0.000885697	50.5355
2106.01	167.688	1.794	0.00096322	50.7012
2106.01	166.995	1.7695	0.00116791	50.8668
2106.01	176.282	1.804	0.00154112	51.0324
2106.02	178.922	1.865	0.00208248	50.951
2106.02	188.539	1.929	0.00234581	50.8696
2106.02	191.169	2.051	0.00239363	50.7883
2106.02	197.387	2.228	0.00220234	50.7069
2106.02	199.711	2.36	0.00205287	50.6255
2106.02	205.041	2.457	0.00190922	50.3565
2106.02	203.151	2.512	0.00171631	50.0875
2106.02	203.366	2.518	0.00161396	49.8184
2106.02	198.164	2.482	0.00162281	49.5494
2106.03	192.351	2.4025	0.00179598	49.2804
2106.03	186.531	2.298	0.00201488	49.1717
2106.03	185.266	2.221	0.00204056	49.063
2106.03	175.195	2.092	0.0022182	48.9544
2106.03	162.947	1.919	0.00214542	48.8457
2106.03	155.259	1.803	0.00187537	48.737
2106.03	146.058	1.732	0.00144246	48.9076
2106.03	112.265	1.6615	0.00113642	49.0782
2106.03	111.843	1.601	0.000902691	49.2487
2106.03	104.056	1.571	0.000743951	49.4193
2106.03	115.699	1.558	0.000629195	49.5899
2106.04	130.037	1.538	0.00054515	49.9385
2106.04	134.21	1.5055	0.000514493	50.2871
2106.04	135.042	1.494	0.000491175	50.6358
2106.04	136.209	1.49	0.000407449	50.9844
2106.04	144.37	1.507	0.000423866	51.333
2106.04	157.055	1.58	0.000488472	51.56
2106.04	166.996	1.657	0.000507738	51.787
2106.04	172.974	1.7445	0.000537514	52.0139
2106.04	182.573	1.836	0.000594508	52.2409
2106.05	185.809	1.917	0.000630656	52.4679
2106.05	192.061	1.995	0.000748332	52.3854
2106.05	202.513	2.057	0.000870574	52.3029
2106.05	207.537	2.102	0.00101821	52.2205
2106.05	208.352	2.142	0.00113189	52.138
2106.05	210.368	2.174	0.00115664	52.0555
2106.05	212.382	2.1875	0.00118578	51.8099
2106.05	214.395	2.19	0.00120488	51.5643
2106.05	215.509	2.179	0.00125978	51.3187
2106.05	212.425	2.149	0.00124386	51.0731
2106.05	209.039	2.1175	0.00117238	50.8275
2106.06	205.651	2.083	0.00117869	50.6535
2106.06	199.251	2.039	0.00113618	50.4795
2106.06	198.263	1.996	0.00110149	50.3055
2106.06	194.565	1.9545	0.00120432	50.1315
2106.06	193.877	1.908	0.00123879	49.9575
2106.06	186.252	1.877	0.00120005	49.8919
2106.06	185.261	1.848	0.00111536	49.8262
2106.06	182.758	1.825	0.00107276	49.7606
2106.06	180.861	1.798	0.000972855	49.6949
2106.07	173.212	1.7765	0.000929519	49.6293
2106.07	176.456	1.756	0.00090332	49.6469
2106.07	176.067	1.749	0.000800758	49.6646
2106.07	176.89	1.742	0.000904079	49.6822
2106.07	175.291	1.737	0.0010241	49.6999
2106.07	177.324	1.733	0.00116071	49.7175
2106.07	176.633	1.7355	0.00122724	49.7034
2106.07	177.757	1.743	0.00117315	49.6892
2106.07	180.09	1.7515	0.00109959	49.6751
2106.07	180.609	1.774	0.000963173	49.6609
2106.07	183.544	1.8215	0.000849303	49.6468
2106.08	183.459	1.865	0.00082	49.54
2106.08	183.675	1.9145	0.000700477	49.4332
2106.08	182.684	1.949	0.000765041	49.3265
2106.08	183.806	1.9585	0.000811651	49.2197
2106.08	181.909	1.948	0.000774126	49.1129
2106.08	177.894	1.9175	0.000711125	48.9455
2106.08	187.171	1.891	0.000761282	48.7781
2106.08	193.414	1.8855	0.000848197	48.6106
2106.08	190.618	1.908	0.000909018	48.4432
2106.09	192.34	1.9795	0.0010158	48.2758
2106.09	197.071	2.048	0.00129828	48.0646
2106.09	194.578	2.1015	0.00139734	47.8534
2106.09	193.89	2.137	0.00144202	47.6422
2106.09	193.503	2.1395	0.00149	47.431
2106.09	188.899	2.124	0.00141008	47.2198
2106.09	185.797	2.0875	0.00107574	47.0801
2106.09	180.278	2.044	0.0010276	46.9404
2106.09	174.143	1.989	0.000988772	46.8007
2106.09	167.398	1.916	0.00104366	46.661
2106.09	164.887	1.843	0.00118307	46.5213
2106.1	161.161	1.762	0.00135869	46.4983
2106.1	156.216	1.6875	0.00155454	46.4753
2106.1	152.482	1.617	0.0016976	46.4522
2106.1	149.962	1.561	0.00194433	46.4292
2106.1	141.345	1.516	0.00223197	46.4062
2106.1	140.344	1.508	0.0019944	46.4405
2106.1	143.613	1.512	0.00180105	46.4748
2106.1	141.393	1.5405	0.00184662	46.5091
2106.1	143.442	1.571	0.00185049	46.5434
2106.11	146.099	1.604	0.0017276	46.5777
2106.11	144.49	1.623	0.00157751	46.6653
2106.11	146.538	1.6415	0.00153636	46.753
2106.11	147.366	1.648	0.00150137	46.8406
2106.11	148.802	1.652	0.00131342	46.9283
2106.11	147.195	1.658	0.0012071	47.0159
2106.11	148.327	1.681	0.00113586	47.1563
2106.11	153.385	1.702	0.0010634	47.2967
2106.11	151.779	1.713	0.000937881	47.437
2106.11	158.408	1.734	0.000911148	47.5774
2106.11	161.357	1.753	0.000868199	47.7178
2106.12	164.578	1.7845	0.000894457	47.8429
2106.12	169.038	1.8	0.000836162	47.9679
2106.12	174.399	1.807	0.00084668	48.093
2106.12	171.289	1.815	0.000861372	48.218
2106.12	175.135	1.8175	0.000934211	48.3431
2106.12	184.41	1.828	0.00102639	48.4141
2106.12	184.325	1.838	0.0011371	48.485
2106.12	187.857	1.847	0.00119404	48.556
2106.12	187.197	1.85	0.00117823	48.6269
2106.12	191.027	1.863	0.0012075	48.6979
2106.13	185.491	1.886	0.00109619	48.7562
2106.13	185.707	1.892	0.00105202	48.8145
2106.13	189.265	1.888	0.00102534	48.8727
2106.13	185.865	1.868	0.00105382	48.931
2106.13	185.45	1.847	0.00100181	48.9893
2106.13	185.365	1.819	0.00100507	49.076
2106.13	181.358	1.7885	0.0010634	49.1628
2106.13	180.971	1.761	0.00114919	49.2495
2106.13	183.601	1.7645	0.00128313	49.3363
2106.14	180.197	1.792	0.00151683	49.423
2106.14	181.922	1.826	0.00163055	49.5825
2106.14	180.629	1.853	0.00148325	49.7419
2106.14	179.034	1.8855	0.00118266	49.9014
2106.14	175.627	1.899	0.000931066	50.0608
2106.14	173.426	1.904	0.000797298	50.2203
2106.14	171.224	1.899	0.000681209	50.5044
2106.14	164.478	1.877	0.000610256	50.7884
2106.14	161.969	1.844	0.000559099	51.0725
2106.14	157.332	1.7885	0.000490584	51.3565
2106.14	151.477	1.734	0.000448106	51.6406
2106.15	152.607	1.6835	0.00044	51.8163
2106.15	152.521	1.652	0.000408884	51.992
2106.15	156.08	1.648	0.000408023	52.1677
2106.15	162.062	1.667	0.00046782	52.3434
2106.15	174.686	1.746	0.00052252	52.5191
2106.15	181.244	1.872	0.000564964	52.1818
2106.15	193.503	2.053	0.000614882	51.8445
2106.15	211.122	2.269	0.000739877	51.5071
2106.15	223.588	2.502	0.00105264	51.1698
2106.16	231.255	2.713	0.00163123	50.8325
2106.16	242.47	2.867	0.00212656	50.0588
2106.16	240.009	2.955	0.00253927	49.2851
2106.16	237.248	2.963	0.0024954	48.5115
2106.16	238.649	2.913	0.00264548	47.7378
2106.16	233.804	2.815	0.00268164	46.9641
2106.16	223.588	2.67	0.00244402	46.2115
2106.16	214.24	2.505	0.00251116	45.4588
2106.16	206.075	2.323	0.00229539	44.7062
2106.16	194.283	2.141	0.00220486	43.9535
2106.16	180.048	1.97	0.00223	43.2009
2106.17	171.203	1.807	0.00230869	42.6822
2106.17	159.918	1.666	0.00252147	42.1635
2106.17	151.941	1.543	0.00271525	41.6448
2106.17	143.952	1.442	0.00326505	41.1261
2106.17	135.638	1.3555	0.00377289	40.6074
2106.17	124.252	1.293	0.00384583	40.2886
2106.17	115.286	1.2285	0.00367255	39.9697
2106.17	104.12	1.1405	0.00364446	39.6509
2106.17	94.4932	1.078	0.00410049	39.332
2106.18	90.1194	1.043	0.00450304	39.0132
2106.18	80.0445	0.9805	0.00483709	38.8752
2106.18	68.8875	0.923	0.00456098	38.7373
2106.18	60.0787	0.8705	0.00440118	38.5993
2106.18	46.4987	0.822	0.00400599	38.4614
2106.18	36.0613	0.7715	0.00413093	38.3234
2106.18	27.1992	0.727	0.00387175	38.3213
2106.18	23.5041	0.6915	0.00317363	38.3192
2106.18	17.4135	0.661	0.0028709	38.317
2106.18	13.3123	0.6285	0.00259023	38.3149
2106.18	6.8099	0.608	0.00242483	38.3128
2106.19		0.592	0.00206327	38.4263
2106.19		0.592	0.0017671	38.5398
2106.19		0.608	0.00155371	38.6533
2106.19		0.626	0.00133567	38.7668
2106.19		0.653	0.00114356	38.8803
2106.19		0.702	0.0010366	39.0269
2106.19	13.2046	0.743	0.000903151	39.1736
2106.19	15.5273	0.783	0.000804713	39.3202
2106.19	24.9871	0.841	0.000820383	39.4669
2106.2	39.1624	0.914	0.00082131	39.6135
2106.2	43.8191	0.981	0.000760922	39.6899
2106.2	51.6388	1.0565	0.000701291	39.7662
2106.2	61.0327	1.134	0.000719754	39.8426
2106.2	71.9812	1.22	0.000652988	39.9189
2106.2	82.1259	1.304	0.000789332	39.9953
2106.2	96.1901	1.3925	0.000784317	39.9292
2106.2	103.182	1.488	0.000893716	39.863
2106.2	108.931	1.585	0.000946162	39.7969
2106.2	115.897	1.683	0.00111512	39.7307
2106.2	124.379	1.778	0.00139863	39.6646
2106.21	123.683	1.868	0.00179723	39.5548
2106.21	126.042	1.9425	0.00207407	39.445
2106.21	128.4	1.992	0.00262914	39.3351
2106.21	121.898	1.989	0.00296395	39.2253
2106.21	119.059	1.95	0.00308799	39.1155
2106.21	113.155	1.879	0.00304465	39.0846
2106.21	110.311	1.794	0.00295568	39.0537
2106.21	105.929	1.6905	0.00289105	39.0227
2106.21	100.929	1.583	0.00272047	38.9918
2106.22	95.6125	1.4755	0.00251801	38.9609
2106.22	89.0593	1.37	0.00227574	39.0816
2106.22	85.2722	1.281	0.00203965	39.2023
2106.22	80.9559	1.203	0.00207713	39.3229
2106.22	70.5987	1.135	0.00198414	39.4436
2106.22	66.5435	1.082	0.00173942	39.5643
2106.22	68.4087	1.0525	0.00146284	39.7136
2106.22	67.4743	1.0245	0.00131061	39.8629
2106.22	71.7061	1.026	0.00116371	40.0122
2106.22	81.091	1.045	0.00104992	40.1615
2106.22	85.8238	1.077	0.000951975	40.3108
2106.23	96.4911	1.158	0.000854575	40.2722
2106.23	109.003	1.257	0.000827164	40.2336
2106.23	116.882	1.382	0.000855548	40.1951
2106.23	127.191	1.525	0.000915902	40.1565
2106.23	137.5	1.622	0.000946141	40.1179
2106.23	145.627	1.7465	0.00124493	39.9084
2106.23	148.247	1.8745	0.00135959	39.6989
2106.23	155.442	1.932	0.00164109	39.4894
2106.23	159.597	1.945	0.00194636	39.2799
2106.24	162.538	1.934	0.00220713	39.0704
2106.24	165.175	1.8855	0.00226344	38.894
2106.24	164.787	1.834	0.00234907	38.7176
2106.24	157.134	1.7555	0.00242538	38.5411
2106.24	151.292	1.678	0.00247834	38.3647
2106.24	148.778	1.5995	0.00249922	38.1883
2106.24	140.794	1.517	0.00263616	38.1112
2106.24	137.057	1.448	0.00267843	38.0341
2106.24	133.927	1.374	0.00272385	37.9571
2106.24	124.689	1.32	0.00268909	37.88
2106.24	118.494	1.267	0.00257027	37.8029
2106.25	114.124	1.221	0.0025115	37.7901
2106.25	110.976	1.176	0.00245711	37.7773
2106.25	102.302	1.1395	0.00262911	37.7644
2106.25	104.673	1.113	0.00265294	37.7516
2106.25	102.746	1.086	0.002215	37.7388
2106.25	104.502	1.071	0.00187139	37.7527
2106.25	103.189	1.0715	0.00169037	37.7666
2106.25	108.597	1.1025	0.00180616	37.7806
2106.25	107.899	1.126	0.00179768	37.7945
2106.26	101.091	1.153	0.0020597	37.8084
2106.26	108.37	1.173	0.00218042	37.8604
2106.26	108.563	1.1905	0.00235525	37.9124
2106.26	110.623	1.188	0.00252934	37.9643
2106.26	111.457	1.1745	0.00237408	38.0163
2106.26	108.614	1.165	0.00229678	38.0683
2106.26	107.609	1.1575	0.00234736	38.2315
2106.26	108.444	1.142	0.00234576	38.3947
2106.26	106.518	1.1245	0.00232878	38.5579
2106.26	103.366	1.114	0.00234738	38.7211
2106.26	100.825	1.0895	0.00262088	38.8843
2106.27	99.5112	1.067	0.00285123	39.2119
2106.27	95.1231	1.0375	0.00289342	39.5396
2106.27	92.5773	0.999	0.00299225	39.8672
2106.27	90.0297	0.962	0.00299058	40.1949
2106.27	88.7128	0.925	0.00283864	40.5225
2106.27	89.8592	0.9085	0.00235262	40.9064
2106.27	95.9271	0.901	0.00196725	41.2904
2106.27	98.6076	0.9205	0.00154416	41.6743
2106.27	101.9	0.965	0.00122211	42.0583
2106.28	113.766	1.039	0.00106603	42.4422
2106.28	121.296	1.179	0.00105368	42.656
2106.28	125.484	1.313	0.000976314	42.8697
2106.28	131.525	1.407	0.000934877	43.0835
2106.28	138.134	1.548	0.000947523	43.2972
2106.28	143.795	1.6985	0.000888792	43.511
2106.28	146.442	1.778	0.000817814	43.4461
2106.28	150.025	1.822	0.000812998	43.3812
2106.28	153.576	1.8665	0.00085626	43.3162
2106.28	156.793	1.917	0.000937922	43.2513
2106.28	157.615	1.947	0.000978197	43.1864
2106.29	153.595	1.9505	0.000988424	43.0162
2106.29	153.207	1.939	0.00100638	42.846
2106.29	151.607	1.891	0.00110266	42.6759
2106.29	147.581	1.835	0.00113628	42.5057
2106.29	139.602	1.75	0.00130041	42.3355
2106.29	132.216	1.665	0.00144937	42.3059
2106.29	126.341	1.5705	0.00158689	42.2763
2106.29	111.258	1.449	0.00162549	42.2467
2106.29	108.725	1.358	0.00167671	42.2171
2106.3	106.83	1.309	0.00187439	42.1875
2106.3	92.3168	1.239	0.00198382	42.3933
2106.3	83	1.1475	0.0019343	42.5991
2106.3	76.056	1.09	0.00205864	42.805
2106.3	60.5787	1.0435	0.0022241	43.0108
2106.3	51.3864	0.997	0.00218468	43.2166
2106.3		0.9585	0.00207282	43.5904
2106.3		0.923	0.00202074	43.9642
2106.3		0.9115	0.00163823	44.3381
2106.3		0.907	0.00124748	44.7119
2106.3		0.927	0.00101399	45.0857
2106.31		0.975	0.000686557	45.2803
2106.31		1.0645	0.000558799	45.4749
2106.31		1.2	0.000502933	45.6696
2106.31		1.4345	0.000457732	45.8642
2106.31		1.9155	0.000452415	46.0588
2106.31		2.388	0.000447145	45.8469
2106.31		2.742	0.000459523	45.6349
2106.31		3.279	0.000461473	45.423
2106.31		3.771	0.00055	45.211
2106.32		4.1325	0.000594775	44.9991
2106.32		4.398	0.000599232	44.5914
2106.32		4.428	0.000705738	44.1838
2106.32		4.3105	0.000778178	43.7761
2106.32		4.12	0.000894098	43.3685
2106.32		3.8645	0.00113049	42.9608
2106.32		3.577	0.00124651	42.6079
2106.32		3.2735	0.00139259	42.255
2106.32		2.969	0.00169751	41.9022
2106.32		2.6815	0.00173793	41.5493
2106.32		2.409	0.00195	41.1964
2106.33		2.1645	0.00204066	41.0297
2106.33		1.952	0.00221608	40.863
2106.33		1.773	0.00240731	40.6964
2106.33		1.625	0.00263808	40.5297
2106.33		1.5005	0.00266908	40.363
2106.33		1.389	0.00286516	40.3455
2106.33		1.2995	0.00275371	40.328
2106.33		1.193	0.00251164	40.3105
2106.33		1.12	0.00214872	40.293
2106.34		1.0705	0.00180881	40.2755
2106.34		1.028	0.00147334	40.3491
2106.34		1.015	0.00137648	40.4228
2106.34		1.017	0.00133	40.4964
2106.34		1.0535	0.00133	40.5701
2106.34		1.099	0.00150996	40.6437
2106.34		1.1465	0.00172184	40.7564
2106.34		1.2025	0.0017716	40.8691
2106.34		1.218	0.00190444	40.9817
2106.34		1.2315	0.00180209	41.0944
2106.34		1.248	0.00169126	41.2071
2106.35	12.968	1.259	0.0015248	41.3162
2106.35	16.8378	1.265	0.00143098	41.4253
2106.35	27.0571	1.2795	0.0012924	41.5344
2106.35	33.2952	1.303	0.00123595	41.6435
2106.35	30.8072	1.3145	0.00117252	41.7526
2106.35	40.9992	1.348	0.00112826	41.8211
2106.35	38.9117	1.385	0.00114373	41.8896
2106.35	42.365	1.439	0.00124888	41.9581
2106.35	41.8597	1.483	0.00131148	42.0266
2106.36	44.5212	1.512	0.00144377	42.0951
2106.36	40.0614	1.533	0.00163214	42.2282
2106.36	36.3899	1.531	0.00205437	42.3612
2106.36	36.6774	1.508	0.00250215	42.4943
2106.36	25.0351	1.456	0.00274322	42.6273
2106.36	24.1334	1.397	0.00272786	42.7604
2106.36	20.4506	1.3365	0.00245787	42.9684
2106.36	14.3802	1.284	0.00201772	43.1764
2106.36	13.4747	1.231	0.0016444	43.3844
2106.36	19.7285	1.183	0.00147241	43.5924
2106.36	21.606	1.148	0.00115885	43.8004
2106.37	30.6235	1.145	0.00104419	43.9359
2106.37	41.6015	1.2005	0.000939243	44.0715
2106.37	54.9246	1.302	0.000939967	44.207
2106.37	69.7815	1.4435	0.000907584	44.3426
2106.37	84.341	1.599	0.000890082	44.4781
2106.37	95.3146	1.741	0.000883828	44.3971
2106.37	113.87	1.8905	0.00087027	44.3161
2106.37	110.427	1.976	0.000904129	44.2352
2106.37	123.156	2.0225	0.00098172	44.1542
2106.38	125.508	2.044	0.00108	44.0732
2106.38	131.504	2.0435	0.00115371	43.8942
2106.38	140.53	2.036	0.00122587	43.7152
2106.38	139.232	2.0035	0.00128931	43.5362
2106.38	139.753	1.974	0.0014353	43.3572
2106.38	143.306	1.932	0.00155579	43.1782
2106.38	135.335	1.89	0.00173808	43.086
2106.38	133.124	1.8375	0.00201774	42.9937
2106.38	130.912	1.773	0.00233592	42.9015
2106.38	120.477	1.699	0.00249203	42.8092
2106.39	115.514	1.618	0.00247962	42.717
2106.39	105.959	1.524	0.0024387	42.8426
2106.39	96.381	1.433	0.00222848	42.9682
2106.39	84.8988	1.3445	0.00217814	43.0938
2106.39	77.0122	1.27	0.0019871	43.2194
2106.39	75.7256	1.2015	0.00181711	43.345
2106.39	66.9352	1.133	0.00151514	43.5505
2106.39	63.2856	1.115	0.00126318	43.756
2106.39	64.7515	1.128	0.00109632	43.9614
2106.39	63.069	1.175	0.000968033	44.1669
2106.39	66.1086	1.254	0.000895599	44.3724
2106.4	71.5047	1.343	0.000859836	44.4821
2106.4	75.717	1.4555	0.00084	44.5919
2106.4	82.2787	1.57	0.000856551	44.7016
2106.4	92.8792	1.687	0.000831612	44.8114
2106.4	98.8964	1.8405	0.000837008	44.9211
2106.4	104.322	1.954	0.000848741	44.8381
2106.4	113.431	2.024	0.000808516	44.7552
2106.4	120.054	2.116	0.0008	44.6722
2106.4	133.019	2.2345	0.000791075	44.5893
2106.41	142.943	2.305	0.000792541	44.5063
2106.41	147.701	2.374	0.000785118	44.2942
2106.41	152.453	2.433	0.000770553	44.0821
2106.41	158.708	2.479	0.000804481	43.8699
2106.41	160.132	2.521	0.000875784	43.6578
2106.41	157.935	2.5385	0.000909344	43.4457
2106.41	157.549	2.542	0.00101275	43.2137
2106.41	156.256	2.5235	0.00117619	42.9818
2106.41	149.498	2.4535	0.00127178	42.7498
2106.41	142.15	2.366	0.00125483	42.5179
2106.41	149.922	2.2595	0.00134227	42.2859
2106.42	129.846	2.149	0.00144782	42.0998
2106.42	123.1	2.086	0.00135328	41.9138
2106.42	120.275	2.0195	0.00113581	41.7277
2106.42	113.76	2.0015	0.0011085	41.5417
2106.42	106.96	2.04	0.0010867	41.3556
2106.42	102.594	2.074	0.0011036	41.1764
2106.42	97.6127	2.094	0.00124933	40.9972
2106.42	90.4764	2.0895	0.0015025	40.818
2106.42	86.4019	2.052	0.00173377	40.6388
2106.43	80.0668	1.997	0.00227992	40.4596
2106.43	68.9339	1.8905	0.00263811	40.3946
2106.43	62.5357	1.814	0.00276008	40.3295
2106.43	54.1594	1.7295	0.00272455	40.2645
2106.43	45.7702	1.657	0.00280762	40.1994
2106.43	38.1572	1.5865	0.00296648	40.1344
2106.43	28.9501	1.514	0.00288566	40.2397
2106.43		1.45	0.00297483	40.345
2106.43		1.376	0.00296624	40.4504
2106.43		1.309	0.00323644	40.5557
2106.43		1.2175	0.00348715	40.661
2106.44		1.145	0.00339214	40.9047
2106.44		1.103	0.00338574	41.1485
2106.44		1.049	0.00320113	41.3922
2106.44		0.9925	0.0026785	41.636
2106.44		0.97	0.00222285	41.8797
2106.44		0.968	0.00185316	42.0675
2106.44		0.97	0.00161694	42.2553
2106.44		0.9895	0.00141072	42.4432
2106.44		1.023	0.00109885	42.631
2106.45		1.0755	0.000958506	42.8188
2106.45		1.14	0.000881585	42.8483
2106.45		1.229	0.000806336	42.8778
2106.45		1.3485	0.000680061	42.9073
2106.45	28.514	1.445	0.000710342	42.9368
2106.45	31.9672	1.5235	0.000746991	42.9663
2106.45	37.7891	1.59	0.000848852	42.9783
2106.45	41.2349	1.6165	0.000989662	42.9902
2106.45	44.6797	1.629	0.00109975	43.0022
2106.45	45.3605	1.6115	0.00134286	43.0141
2106.45	44.4633	1.586	0.00168577	43.0261
2106.46	41.5924	1.533	0.00195886	43.1332
2106.46	38.684	1.466	0.00198878	43.2402
2106.46	39.366	1.405	0.00199967	43.3473
2106.46	40.8733	1.365	0.00187367	43.4543
2106.46	38.7906	1.323	0.0015784	43.5614
2106.46	35.0907	1.2905	0.00137959	43.7864
2106.46	40.5128	1.271	0.00121943	44.0114
2106.46	43.1673	1.2685	0.00106596	44.2363
2106.46	44.2429	1.272	0.0010382	44.4613
2106.47	50.0485	1.2945	0.000934426	44.6863
2106.47	55.8474	1.313	0.000812278	44.9332
2106.47	66.3524	1.3515	0.00083168	45.1801
2106.47	77.6226	1.402	0.000859018	45.4271
2106.47	81.8377	1.4475	0.000907076	45.674
2106.47	90.6396	1.4945	0.000904666	45.9209
2106.47	98.8214	1.508	0.000965061	46.1466
2106.47	110.95	1.517	0.00103	46.3723
2106.47	119.394	1.546	0.000933738	46.5979
2106.47	132.065	1.588	0.000796475	46.8236
2106.47	144.094	1.656	0.00068	47.0493
2106.48	152.765	1.745	0.000599098	47.1427
2106.48	163.828	1.853	0.000581544	47.236
2106.48	178.153	1.9605	0.000580383	47.3294
2106.48	194.492	2.074	0.000649782	47.4227
2106.48	203.054	2.129	0.000687817	47.5161
2106.48	219.016	2.159	0.000621762	47.461
2106.48	233.707	2.1885	0.000634319	47.4059
2106.48	246.605	2.22	0.000677377	47.3508
2106.48	257.725	2.248	0.00069	47.2957
2106.49	280.189	2.3115	0.000814391	47.2406
2106.49	296.717	2.388	0.000786557	47.0342
2106.49	313.456	2.4685	0.000840665	46.8279
2106.49	336.734	2.571	0.000898484	46.6215
2106.49	349.011	2.642	0.000905415	46.4152
2106.49	362.103	2.7145	0.00093082	46.2088
2106.49	368.307	2.774	0.00095	46.0396
2106.49	371.076	2.8045	0.00102592	45.8704
2106.49	373.845	2.811	0.000976393	45.7012
2106.49	367.767	2.779	0.00116699	45.532
2106.49	360.536	2.72	0.00145246	45.3628
2106.5	350.137	2.628	0.00183922	45.3408
2106.5	341.439	2.51	0.00212992	45.3189
2106.5	330.126	2.372	0.00217462	45.2969
2106.5	314.734	2.223	0.00202198	45.275
2106.5	303.636	2.0755	0.00177	45.253
2106.5	290.149	1.9205	0.00139647	45.2966
2106.5	279.569	1.847	0.00123653	45.3402
2106.5	276.007	1.822	0.00102713	45.3838
2106.5	270.659	1.803	0.000906639	45.4274
2106.51	268.818	1.807	0.000935615	45.471
2106.51	268.148	1.8355	0.00086	45.4154
2106.51	268.063	1.854	0.000839959	45.3599
2106.51	270.027	1.8855	0.000885334	45.3043
2106.51	277.223	1.934	0.000883309	45.2488
2106.51	283.56	1.995	0.000831583	45.1932
2106.51	284.641	2.0685	0.000777899	44.9552
2106.51	290.383	2.146	0.000678637	44.7172
2106.51	295.244	2.2225	0.000691678	44.4792
2106.51	295.45	2.284	0.000695628	44.2412
2106.51	296.528	2.318	0.000708598	44.0032
2106.52	294.699	2.334	0.000800723	43.6489
2106.52	289.668	2.314	0.000866311	43.2946
2106.52	286.962	2.282	0.0008497	42.9404
2106.52	279.004	2.2245	0.000770584	42.5861
2106.52	268.104	2.166	0.000711091	42.2318
2106.52	259.814	2.103	0.000850123	41.9392
2106.52	242.946	2.0075	0.00088249	41.6466
2106.52	231.95	1.922	0.000972783	41.3541
2106.52	217.36	1.8285	0.0010491	41.0615
2106.53	206.296	1.726	0.00116598	40.7689
2106.53	191.911	1.628	0.00140135	40.6243
2106.53	171.49	1.525	0.00168236	40.4797
2106.53	158.788	1.4325	0.00203754	40.335
2106.53	146.652	1.34	0.00227276	40.1904
2106.53	131.75	1.267	0.00232198	40.0458
2106.53	114.334	1.1685	0.00217098	40.0524
2106.53	103.284	1.105	0.00217974	40.059
2106.53	95.2872	1.068	0.00202888	40.0657
2106.53	83.6419	1.0195	0.00199314	40.0723
2106.53	73.6922	0.959	0.00186398	40.0789
2106.54	61.4307	0.923	0.00157575	40.1468
2106.54	55.0382	0.899	0.00153313	40.2147
2106.54	52.5719	0.875	0.00170705	40.2825
2106.54	47.7433	0.871	0.00161644	40.3504
2106.54	47.6354	0.867	0.0016316	40.4183
2106.54	46.7402	0.871	0.00175468	40.4464
2106.54	52.9263	0.896	0.00155951	40.4745
2106.54	55.1766	0.964	0.00141682	40.5027
2106.54	63.7062	1.059	0.00111873	40.5308
2106.55	69.8707	1.1595	0.000933402	40.5589
2106.55	69.7628	1.259	0.000835849	40.5771
2106.55	80.2213	1.332	0.000677193	40.5952
2106.55	82.0686	1.39	0.000721803	40.6134
2106.55	86.5603	1.429	0.000857049	40.6315
2106.55	86.7531	1.455	0.00114293	40.6497
2106.55	92.4833	1.454	0.00157719	40.7677
2106.55	90.8688	1.4365	0.0019	40.8858
2106.55	86.1934	1.408	0.00161736	41.0038
2106.55	86.1085	1.373	0.00186893	41.1219
2106.55	85.4114	1.338	0.00182721	41.2399
2106.56	78.0406	1.3075	0.00165492	41.4194
2106.56	74.3768	1.2645	0.00133739	41.5989
2106.56	69.1791	1.238	0.0011801	41.7783
2106.56	64.3682	1.2165	0.00111	41.9578
2106.56	61.1226	1.21	0.00115397	42.1373
2106.56	54.7328	1.204	0.0010143	42.234
2106.56	49.9093	1.201	0.000841967	42.3307
2106.56	50.9807	1.202	0.00075	42.4273
2106.56	49.6935	1.208	0.000721421	42.524
2106.57	44.865	1.2125	0.000714025	42.6207
2106.57	44.7212	1.2265	0.000706557	42.5561
2106.57	43.0388	1.254	0.000661434	42.4916
2106.57	43.3245	1.27	0.000700574	42.427
2106.57	42.0356	1.3	0.000808704	42.3625
2106.57	47.8303	1.315	0.000885123	42.2979
2106.57	44.1817	1.346	0.00118709	42.1676
2106.57	46.0412	1.372	0.00146478	42.0373
2106.57	47.1135	1.405	0.0016626	41.907
2106.57	46.2179	1.4135	0.00179577	41.7767
2106.57	44.1076	1.415	0.00202597	41.6464
2106.58	45.9671	1.407	0.0021359	41.5591
2106.58	43.4984	1.3845	0.0022422	41.4718
2106.58	41.0286	1.358	0.00220239	41.3846
2106.58	41.7082	1.3275	0.00196683	41.2973
2106.58	41.6003	1.31	0.00193791	41.21
2106.58	42.2798	1.283	0.00178662	41.1517
2106.58	46.8932	1.263	0.00155711	41.0935
2106.58	51.5021	1.2575	0.00135164	41.0352
2106.58	49.3935	1.255	0.00122016	40.977
2106.59	55.1779	1.26	0.00122744	40.9187
2106.59	59.3866	1.267	0.00116192	40.8007
2106.59	59.671	1.286	0.00115	40.6826
2106.59	67.4013	1.308	0.00123275	40.5646
2106.59	66.5102	1.314	0.00140998	40.4465
2106.59	68.7518	1.3185	0.00160883	40.3285
2106.59	69.4269	1.317	0.00188879	40.258
2106.59	72.0579	1.3115	0.00225904	40.1875
2106.59	64.8677	1.276	0.00268469	40.1171
2106.59	62.8007	1.241	0.00290586	40.0466
2106.59	59.5926	1.213	0.0029088	39.9761
2106.6	57.5224	1.172	0.00287428	40.0404
2106.6	51.8845	1.115	0.00287734	40.1046
2106.6	45.0958	1.075	0.00296824	40.1689
2106.6	38.2978	1.0505	0.00313268	40.2331
2106.6	32.2802	1.019	0.003252	40.2974
2106.6	29.8058	0.9885	0.00321932	40.4634
2106.6	27.6899	0.9625	0.00302243	40.6294
2106.6	27.9768	0.94	0.00274373	40.7955
2106.6	27.4741	0.9265	0.00240643	40.9615
2106.61	23.8142	0.926	0.00217175	41.1275
2106.61	26.0749	0.9425	0.00200178	41.3481
2106.61	27.5456	0.969	0.00177217	41.5687
2106.61	32.5642	0.996	0.00171484	41.7894
2106.61	31.2739	1.022	0.00165751	42.01
2106.61	34.7123	1.052	0.00171233	42.2306
2106.61	42.8717	1.069	0.00171269	42.4708
2106.61	40.4032	1.095	0.00176503	42.711
2106.61	44.2292	1.132	0.00173873	42.9511
2106.61	55.9025	1.182	0.00166111	43.1913
2106.61	61.2485	1.2355	0.00157412	43.4315
2106.62	59.5732	1.272	0.00147021	43.7075
2106.62	66.516	1.3085	0.00139924	43.9835
2106.62	66.4082	1.329	0.00146648	44.2595
2106.62	80.1104	1.357	0.00160273	44.5355
2106.62		1.363	0.00165	44.8115
2106.62		1.3645	0.00155843	45.0532
2106.62		1.361	0.00136756	45.295
2106.62	84.6646	1.3505	0.00106603	45.5367
2106.62	85.1634	1.336	0.000874242	45.7785
2106.62	86.6081	1.346	0.00076	46.0202
2106.63	86.5236	1.3755	0.000736544	46.0931
2106.63	88.2731	1.429	0.000632979	46.1661
2106.63	90.6326	1.499	0.000620697	46.239
2106.63	99.0904	1.575	0.00058346	46.312
2106.63	101.138	1.635	0.000601096	46.3849
2106.63	102.577	1.678	0.00067991	46.3516
2106.63	102.796	1.7005	0.00081	46.3183
2106.63	104.206	1.698	0.000849795	46.2851
2106.63	101.686	1.671	0.000904662	46.2518
2106.64	103.123	1.634	0.00099825	46.2185
2106.64	108.211	1.586	0.00112083	46.1201
2106.64	105.085	1.527	0.00112848	46.0217
2106.64	105.001	1.492	0.00103806	45.9232
2106.64	107.957	1.4755	0.000941038	45.8248
2106.64	105.44	1.5	0.000838495	45.7264
2106.64	110.523	1.5415	0.000786342	45.6049
2106.64	115.268	1.608	0.000770256	45.4834
2106.64	113.059	1.643	0.000814534	45.3619
2106.64	109.634	1.6515	0.000832941	45.2404
2106.64	110.461	1.65	0.00093217	45.1189
2106.65	111.591	1.636	0.000950655	45.0815
2106.65	117.576	1.615	0.00111074	45.0442
2106.65	119.613	1.6025	0.00116019	45.0068
2106.65	118.619	1.588	0.00120828	44.9695
2106.65	120.353	1.5635	0.00112002	44.9321
2106.65	119.028	1.5495	0.00106336	45.0094
2106.65	118.338	1.536	0.00102409	45.0868
2106.65	116.131	1.5225	0.000994426	45.1641
2106.65	116.956	1.513	0.00111	45.2415
2106.66	112.319	1.5055	0.00117723	45.3188
2106.66	109.503	1.488	0.00116609	45.4074
2106.66	114.579	1.46	0.00135787	45.4961
2106.66	108.698	1.4245	0.00154899	45.5847
2106.66	109.829	1.407	0.00156437	45.6734
2106.66	114.903	1.4105	0.00152836	45.762
2106.66	119.973	1.449	0.00128266	45.6773
2106.66	124.733	1.521	0.00101342	45.5926
2106.66	137.006	1.6615	0.000841148	45.5078
2106.66	144.454	1.778	0.000714297	45.4231
2106.66	147.078	1.8925	0.000662602	45.3384
2106.67	152.706	1.999	0.000672536	45.1693
2106.67	161.323	2.07	0.000645164	45.0003
2106.67	163.337	2.105	0.000589577	44.8312
2106.67	164.151	2.105	0.000570819	44.6622
2106.67	166.162	2.077	0.000646776	44.4931
2106.67	166.077	2.018	0.000882688	44.3479
2106.67	166.564	1.9255	0.0010944	44.2026
2106.67	166.479	1.865	0.00136098	44.0574
2106.67	163.7	1.8435	0.00174842	43.9121
2106.68	163.915	1.841	0.00146206	43.7669
2106.68	166.226	1.8535	0.00124512	43.6787
2106.68	163.746	1.893	0.00106702	43.5906
2106.68	159.167	1.94	0.00101132	43.5024
2106.68	157.583	1.989	0.000974467	43.4143
2106.68	157.498	1.998	0.000999191	43.3261
2106.68	151.983	1.9815	0.00103883	43.321
2106.68	147.09	1.927	0.00121372	43.316
2106.68	141.287	1.854	0.00126232	43.3109
2106.68	131.253	1.766	0.00153421	43.3059
2106.68	130.565	1.6825	0.00188455	43.3008
2106.69	129.272	1.607	0.00208522	43.3574
2106.69	124.049	1.5385	0.00226779	43.414
2106.69	116.397	1.496	0.00207877	43.4705
2106.69	117.221	1.4605	0.00197247	43.5271
2106.69	114.381	1.4355	0.00176577	43.5837
2106.69	115.509	1.42	0.0016776	43.6434
2106.69	115.728	1.416	0.00143193	43.7032
2106.69	111.702	1.416	0.00123364	43.7629
2106.69	110.1	1.4165	0.00112082	43.8227
2106.7	109.684	1.416	0.00100767	43.8824
2106.7	108.386	1.412	0.000985195	43.9467
2106.7	109.516	1.4055	0.00087373	44.011
2106.7	111.252	1.389	0.00091748	44.0753
2106.7	110.561	1.3635	0.000943151	44.1396
2106.7	111.083	1.34	0.000970656	44.2039
2106.7	112.818	1.3125	0.00111369	44.2131
2106.7	114.553	1.292	0.00119929	44.2224
2106.7	115.983	1.271	0.00153934	44.2316
2106.7	118.625	1.282	0.00173191	44.2409
2106.7	122.777	1.327	0.00144784	44.2501
2106.71	122.087	1.391	0.00117671	44.1358
2106.71	107.153	1.473	0.000985082	44.0215
2106.71	114.624	1.5555	0.000781746	43.9072
2106.71	113.328	1.605	0.000828254	43.7929
2106.71	110.207	1.6345	0.000767398	43.6786
2106.71	106.485	1.651	0.000768117	43.5243
2106.71		1.6515	0.000804098	43.37
2106.71		1.646	0.000778291	43.2156
2106.71		1.628	0.000814084	43.0613
2106.72		1.607	0.000857582	42.907
2106.72		1.5835	0.000977636	42.8894
2106.72		1.5395	0.00108752	42.8718
2106.72		1.504	0.00103071	42.8543
2106.72		1.471	0.00106489	42.8367
2106.72		1.417	0.00125893	42.8191
2106.72		1.3345	0.00144182	42.8944
2106.72		1.274	0.00162668	42.9697
2106.72		1.2075	0.00189463	43.0451
2106.72		1.141	0.00214268	43.1204
2106.72		1.0885	0.00240498	43.1957
2106.73		1.0585	0.0025909	43.1911
2106.73	97.7849	1.06	0.00263	43.1864
2106.73	98.6124	1.0885	0.00235551	43.1818
2106.73	102.48	1.151	0.00198138	43.1771
2106.73	106.344	1.242	0.00159751	43.1725
2106.73	109.264	1.3475	0.00127178	43.0715
2106.73	114.333	1.419	0.00099737	42.9706
2106.73	114.277	1.456	0.000899467	42.8696
2106.73	112.678	1.4835	0.000924637	42.7687
2106.74	114.108	1.499	0.000965586	42.6677
2106.74	114.932	1.4905	0.00103311	42.674
2106.74	112.728	1.468	0.00118381	42.6803
2106.74	110.219	1.4445	0.00130409	42.6865
2106.74	108.315	1.405	0.00160965	42.6928
2106.74	104.589	1.3575	0.00196088	42.6991
2106.74	100.253	1.31	0.00225957	42.9697
2106.74	91.649	1.2545	0.00237327	43.2403
2106.74	75.1023	1.1705	0.00252295	43.5109
2106.74	64.8548	1.107	0.0028339	43.7815
2106.74	61.6212	1.0525	0.00299151	44.0521
2106.75	52.1298	0.999	0.0029315	44.5778
2106.75	50.4563	0.954	0.00283433	45.1035
2106.75	46.432	0.918	0.0027503	45.6293
2106.75	41.2277	0.8815	0.00273284	46.155
2106.75	36.0186	0.866	0.00273	46.6807
2106.75	35.947	0.853	0.00265904	47.2049
2106.75	40.1555	0.8315	0.00257422	47.7291
2106.75	38.444	0.827	0.00258294	48.2534
2106.75	41.0828	0.853	0.00239148	48.7776
2106.76	46.8544	0.891	0.0020081	49.3018
2106.76	53.4032	0.958	0.00144174	49.4436
2106.76	58.768	1.0515	0.00105967	49.5853
2106.76	75.0503	1.141	0.000766767	49.7271
2106.76	91.1015	1.221	0.000497664	49.8688
2106.76	101.661	1.294	0.00038123	50.0106
2106.76	119.75	1.2835	0.000278852	49.7152
2106.76	144.047	1.779	0.000231516	49.4198
2106.76	144.047	1.779	0.000251678	49.1244
2106.76	166.104	2.5025	0.000224372	48.829
2106.76	189.227	2.8325	0.000204385	48.5336
2106.77	202.488	3.072	0.000203087	48.1345
2106.77	211.864	3.2285	0.00022	47.7353
2106.77	218.861	3.3	0.000237295	47.3362
2106.77	219.66	3.268	0.000248238	46.937
2106.77	219.281	3.181	0.000230819	46.5379
2106.77	218.902	3.031	0.00024	46.3525
2106.77	208.489	2.853	0.000301107	46.1671
2106.77	201.898	2.6465	0.000346098	45.9818
2106.77	194.969	2.3715	0.00045834	45.7964
2106.78	182.118	2.17	0.00057002	45.611
2106.78	172.204	1.998	0.000734795	45.6256
2106.78	168.242	1.851	0.00103737	45.6403
2106.78	157.994	1.7395	0.00145011	45.6549
2106.78	144.722	1.659	0.00186831	45.6696
2106.78	140.131	1.606	0.00195827	45.6842
2106.78	135.206	1.5525	0.00189049	45.6969
2106.78	132.413	1.518	0.00180711	45.7096
2106.78	134.135	1.5045	0.0016216	45.7222
2106.78	134.653	1.496	0.00132951	45.7349
2106.78	134.869	1.503	0.00117918	45.7476
2106.79	136.892	1.524	0.00114228	45.6574
2106.79	139.514	1.5745	0.00110745	45.5671
2106.79	139.702	1.635	0.00116079	45.4769
2106.79	141.421	1.664	0.00121308	45.3866
2106.79	139.533	1.693	0.00118706	45.2964
2106.79	140.05	1.7	0.00106218	45.1838
2106.79	140.567	1.698	0.00102918	45.0712
2106.79	137.449	1.668	0.000928306	44.9585
2106.79	132.55	1.651	0.000865517	44.8459
2106.8	130.659	1.618	0.000796803	44.7333
2106.8	129.37	1.584	0.000755834	44.6526
2106.8	131.394	1.545	0.000765287	44.5719
2106.8	135.223	1.51	0.00081956	44.4912
2106.8	137.845	1.5035	0.000893115	44.4105
2106.8	141.64	1.5065	0.00106147	44.3298
2106.8	146.958	1.532	0.00117718	44.2172
2106.8	153.167	1.5765	0.00138207	44.1047
2106.8	156.975	1.614	0.00158355	43.9921
2106.8	161.375	1.648	0.00169277	43.8796
2106.8	164.251	1.6615	0.00164018	43.767
2106.81	163.27	1.665	0.00141361	43.681
2106.81	163.484	1.6585	0.00113429	43.595
2106.81	166.088	1.651	0.000997749	43.509
2106.81	160.328	1.6345	0.000861202	43.423
2106.81	156.357	1.607	0.000794479	43.337
2106.81	153.879	1.5785	0.000637609	43.393
2106.81	143.576	1.5195	0.000689045	43.4489
2106.81	136.883	1.466	0.0006	43.5049
2106.81	131.384	1.405	0.000685738	43.5608
2106.82	122.258	1.341	0.000822065	43.6168
2106.82	117.041	1.2835	0.00107896	43.6834
2106.82	114.842	1.223	0.00121442	43.75
2106.82	116.269	1.1735	0.00148287	43.8165
2106.82	115.278	1.121	0.00147508	43.8831
2106.82	123.646	1.0905	0.00136241	43.9497
2106.82	134.978	1.0805	0.00113068	43.8566
2106.82	142.706	1.126	0.000986885	43.7635
2106.82	155.204	1.24	0.000689426	43.6703
2106.82	163.491	1.388	0.00044135	43.5772
2106.82	170.862	1.5565	0.00027498	43.4841
2106.83	177.626	1.703	0.00025	43.3164
2106.83	182.596	1.81	0.000256967	43.1486
2106.83	184.562	1.883	0.000255123	42.9809
2106.83	185.666	1.897	0.000237546	42.8131
2106.83	186.175	1.879	0.000300615	42.6454
2106.83	183.688	1.831	0.000341501	42.5336
2106.83	178.85	1.773	0.00041873	42.4219
2106.83	176.683	1.7165	0.000459344	42.3101
2106.83	167.963	1.652	0.000607853	42.1984
2106.84	162.509	1.5755	0.000742398	42.0866
2106.84	157.047	1.498	0.000867722	41.9961
2106.84	152.476	1.4185	0.00120525	41.9057
2106.84	149.67	1.33	0.00131553	41.8152
2106.84	147.189	1.307	0.00124365	41.7248
2106.84	143.507	1.3075	0.00117246	41.6343
2106.84	146.421	1.324	0.00105913	41.5399
2106.84	146.936	1.373	0.000817561	41.4455
2106.84	144.454	1.415	0.000642892	41.3511
2106.84	144.37	1.451	0.000449754	41.2567
2106.84	143.658	1.4625	0.00041416	41.1623
2106.85	135.769	1.461	0.000398916	41.1188
2106.85	135.384	1.449	0.000413115	41.0753
2106.85	136.803	1.416	0.000417735	41.0318
2106.85	131.307	1.3845	0.00053	40.9883
2106.85	130.593	1.3345	0.000635992	40.9448
2106.85	132.916	1.307	0.000752418	40.9074
2106.85	133.132	1.272	0.00099373	40.8699
2106.85	133.349	1.256	0.00123336	40.8325
2106.85	136.899	1.253	0.00131492	40.795
2106.86	135.913	1.2675	0.00155239	40.7576
2106.86	140.005	1.313	0.00148826	40.7167
2106.86	143.82	1.354	0.0012592	40.6758
2106.86	143.736	1.391	0.0010784	40.635
2106.86	143.024	1.43	0.000896742	40.5941
2106.86	143.54	1.441	0.000633579	40.5532
2106.86	142.854	1.421	0.000534699	40.5995
2106.86	137.971	1.395	0.000497505	40.6458
2106.86	134.281	1.3495	0.000449242	40.6921
2106.86	129.99	1.308	0.000458282	40.7384
2106.86	125.391	1.2535	0.00047082	40.7847
2106.87	120.457	1.179	0.000539467	40.9281
2106.87	118.262	1.12	0.000681554	41.0715
2106.87	115.461	1.0755	0.000831803	41.2149
2106.87	115.076	1.029	0.00112104	41.3583
2106.87	113.784	0.9945	0.00144684	41.5017
2106.87	108.534	0.972	0.00158	41.7405
2106.87	107.543	0.979	0.00177131	41.9793
2106.87	106.249	1.019	0.0019677	42.2182
2106.87	106.165	1.063	0.00197683	42.457
2106.88	104.568	1.099	0.00192667	42.6958
2106.88	105.997	1.128	0.00169559	43.0558
2106.88	103.189	1.159	0.00154231	43.4158
2106.88	100.379	1.17	0.00132276	43.7759
2106.88	98.1732	1.1735	0.00118948	44.1359
2106.88	98.9985	1.171	0.00108699	44.4959
2106.88	97.3985	1.1605	0.00104769	44.9084
2106.88	96.405	1.132	0.00102984	45.3208
2106.88	95.4111	1.1095	0.00114234	45.7333
2106.88	93.8101	1.084	0.00126369	46.1457
2106.89	97.6688	1.078	0.00136508	46.5582
2106.89	101.524	1.111	0.00151286	46.9503
2106.89	100.834	1.181	0.00161	47.3424
2106.89	107.408	1.286	0.0019462	47.7345
2106.89	120.605	1.4095	0.00224721	48.1266
2106.89	127.419	1.596	0.00217711	48.5187
2106.89	134.849	1.719	0.00167947	48.9037
2106.89	144.957	1.816	0.0013053	49.2886
2106.89	155.046	1.884	0.00106546	49.6736
2106.89	167.19	1.9235	0.000927049	50.0585
2106.89	173.356	1.945	0.000881583	50.4435
2106.9	180.103	1.9425	0.000845041	50.7401
2106.9	186.248	1.928	0.00084296	51.0367
2106.9	194.452	1.913	0.000864068	51.3332
2106.9	202.051	1.918	0.000854153	51.6298
2106.9	214.93	1.944	0.00101851	51.9264
2106.9	227.771	1.986	0.00114984	51.9548
2106.9	235.008	2.036	0.00123939	51.9831
2106.9	253.876	2.1205	0.00123	52.0115
2106.9	265.428	2.196	0.00110012	52.0398
2106.91	276.653	2.2705	0.000870389	52.0682
2106.91	287.271	2.344	0.000716995	51.8149
2106.91	296.991	2.4235	0.000622671	51.5616
2106.91	308.417	2.499	0.00056	51.3083
2106.91	315.507	2.578	0.000489126	51.055
2106.91	322.586	2.645	0.000452787	50.8017
2106.91	329.364	2.6975	0.000395443	50.4211
2106.91	331.567	2.729	0.00034	50.0405
2106.91	335.193	2.7395	0.000334508	49.66
2106.91	337.106	2.738	0.000293438	49.2794
2106.91	337.307	2.7185	0.000278402	48.8988
2106.92	332.059	2.662	0.000306453	48.5592
2106.92	327.69	2.615	0.000326885	48.2195
2106.92	322.172	2.5525	0.00038873	47.8799
2106.92	317.793	2.498	0.000384475	47.5402
2106.92	311.399	2.451	0.000406393	47.2006
2106.92	299.246	2.385	0.00046	47.0414
2106.92	287.63	2.303	0.000485123	46.8822
2106.92	278.298	2.213	0.000572892	46.723
2106.92	268.651	2.1075	0.000664098	46.5638
2106.93	249.932	1.9655	0.00072	46.4046
2106.93	240.221	1.857	0.000751583	46.4769
2106.93	232.562	1.788	0.000783306	46.5492
2106.93	218.695	1.6895	0.000845662	46.6216
2106.93	202.691	1.5675	0.000989079	46.6939
2106.93	194.046	1.485	0.000979754	46.7662
2106.93	181.528	1.4035	0.00112716	46.9649
2106.93	170.163	1.329	0.00150414	47.1636
2106.93	163.532	1.2715	0.0016009	47.3624
2106.93	156.295	1.213	0.00164664	47.5611
2106.93	152.629	1.1675	0.00160955	47.7598
2106.94	150.155	1.129	0.00152619	47.8911
2106.94	150.37	1.12	0.0015312	48.0224
2106.94	155.632	1.145	0.00167464	48.1537
2106.94	163.001	1.191	0.00163645	48.285
2106.94	168.57	1.259	0.00172746	48.4163
2106.94	178.29	1.335	0.0015121	48.5206
2106.94	190.349	1.4285	0.00126992	48.6249
2106.94	198.833	1.532	0.00102006	48.7291
2106.94	214.357	1.6475	0.000784508	48.8334
2106.95	226.309	1.757	0.000585621	48.9377
2106.95	239.681	1.8575	0.00045	49.2175
2106.95	257.344	1.9645	0.000324303	49.4973
2106.95	270.324	2.028	0.000269918	49.777
2106.95	281.812	2.069	0.000246564	50.0568
2106.95	294.999	2.097	0.000272008	50.3366
2106.95	306.702	2.125	0.00024	50.9528
2106.95	317.802	2.139	0.000229672	51.5689
2106.95	324.868	2.1415	0.000322193	52.1851
2106.95	335.032	2.13	0.000411119	52.8012
2106.95	340.93	2.097	0.00052041	53.4174
2106.96	348.238	2.073	0.000736503	54.2706
2106.96	353.265	2.049	0.000827459	55.1238
2106.96	361.966	2.068	0.000889344	55.977
2106.96	374.29	2.1345	0.00106294	56.8302
2106.96	386.885	2.216	0.00115	57.6834
2106.96	394.107	2.306	0.00126673	58.3838
2106.96	400.757	2.392	0.00124529	59.0843
2106.96	405.995	2.4535	0.0013679	59.7847
2106.96	410.667	2.484	0.00135515	60.4852
2106.97	420.356	2.5055	0.00131213	61.1856
2106.97	430.022	2.536	0.00130843	61.304
2106.97	443.544	2.5945	0.00116672	61.4224
2106.97	463.62	2.728	0.00108643	61.5407
2106.97	478.405	2.882	0.00101902	61.6591
2106.97	495.589	3.103	0.000879898	61.7775
2106.97	517.068	3.364	0.000646093	61.3162
2106.97	527.578	3.65	0.000546885	60.8549
2106.97	540.233	3.927	0.000436357	60.3937
2106.97	548.795	4.152	0.000312398	59.9324
2106.97	552.489	4.318	0.000234016	59.4711
2106.98	553.484	4.389	0.000211011	58.8268
2106.98	546.084	4.3665	0.00018209	58.1826
2106.98	537.62	4.271	0.000167766	57.5383
2106.98	522.62	4.122	0.000130055	56.8941
2106.98	511.384	3.947	0.000119591	56.2498
2106.98	493.546	3.7445	0.000124508	55.6572
2106.98	475.637	3.541	0.00014908	55.0646
2106.98	460.403	3.3315	0.000133689	54.4721
2106.98	444.559	3.133	0.000126947	53.8795
2106.99	430.316	2.9575	0.000158405	53.2869
2106.99	410.969	2.7905	0.000146557	52.7653
2106.99	393.528	2.698	0.000183763	52.2437
2106.99	376.004	2.6225	0.000271209	51.7221
2106.99	365.76	2.541	0.000297705	51.2005
2106.99	349.244	2.4575	0.000361022	50.6789
2106.99	336.659	2.362	0.000384057	50.2251
2106.99	325.455	2.2615	0.000416112	49.7712
2106.99	310.786	2.164	0.000336803	49.3174
2106.99	293.183	2.0835	0.00032865	48.8635
2106.99	284.427	2.0055	0.000304385	48.4097
2107	275.97	1.954	0.00031	48.0016
2107	266.623	1.9205	0.000322374	47.5934
2107	257.258	1.898	0.000357111	47.1853
2107	256.303	1.8895	0.000415758	46.7771
[truncated: 23,001 more rows]
