# Supplementary material for: Direct linking of Greenland and Antarctic ice cores at the Toba eruption (74 ka BP)
Source: Copernicus journal article supplement (doi:10.5194/cp-9-749-2013), 2013-03-19
Supplement: Supplementary file 3 [file Figure_9.xls]

## Sheet: Header
Ice core records from the Toba interval
applied in Figure 9 of the paper:
Direct linking of Greenland and Antarctic ice cores at the Toba eruption (74 ka BP)
Svensson et al., Climate of the Past, 2013

## Sheet: NGRIP
% GICC05modelext time scale for the NGRIP ice core released 19 November 2010.
% Age	NGRIP	NGRIP
% (years	depth	d18O
% b2k)	(m)	(permil)
70000	2510.04	-43.47
70020	2510.16	-45.11
70040	2510.28	-44.33
70060	2510.41	-44.09
70080	2510.53	-44.35
70100	2510.65	-42.49
70120	2510.78	-42.64
70140	2510.91	-43.53
70160	2511.03	-42.25
70180	2511.16	-42.59
70200	2511.29	-43.82
70220	2511.42	-42.5
70240	2511.55	-44.18
70260	2511.69	-44.29
70280	2511.82	-43.25
70300	2511.96	-43.23
70320	2512.1	-42.62
70340	2512.25	-44.06
70360	2512.39	-43.38
70380	2512.54	-43.98
70400	2512.69	-41.54
70420	2512.84	-42.09
70440	2512.99	-43.55
70460	2513.14	-41.3
70480	2513.3	-41.77
70500	2513.46	-41.75
70520	2513.63	-42.39
70540	2513.79	-42.2
70560	2513.96	-42.07
70580	2514.13	-42.22
70600	2514.3	-42.24
70620	2514.47	-41.53
70640	2514.65	-41.63
70660	2514.82	-41.63
70680	2514.99	-41.5
70700	2515.16	-42.35
70720	2515.33	-43.2
70740	2515.51	-42.09
70760	2515.69	-40.87
70780	2515.88	-41.83
70800	2516.07	-41.39
70820	2516.26	-42.81
70840	2516.45	-41.38
70860	2516.64	-40.75
70880	2516.84	-40.59
70900	2517.05	-40.22
70920	2517.25	-40.49
70940	2517.47	-40.8
70960	2517.69	-40.72
70980	2517.91	-40.11
71000	2518.14	-40.34
71020	2518.36	-39.17
71040	2518.58	-40.71
71060	2518.8	-39.64
71080	2519.02	-40.07
71100	2519.25	-40.23
71120	2519.48	-41.1
71140	2519.71	-40.39
71160	2519.94	-41.65
71180	2520.17	-40.56
71200	2520.4	-39.63
71220	2520.63	-39.24
71240	2520.88	-40.01
71260	2521.12	-39.89
71280	2521.36	-39
71300	2521.61	-39.85
71320	2521.85	-39.3
71340	2522.1	-40.28
71360	2522.35	-39.28
71380	2522.6	-39.72
71400	2522.85	-40.23
71420	2523.09	-39.9
71440	2523.34	-39.9
71460	2523.59	-40.07
71480	2523.84	-38.91
71500	2524.09	-39.34
71520	2524.35	-39.48
71540	2524.6	-39.55
71560	2524.86	-39.32
71580	2525.11	-39.23
71600	2525.37	-39.51
71620	2525.63	-40.12
71640	2525.89	-38.87
71660	2526.16	-40.1
71680	2526.42	-38.9
71700	2526.69	-39.03
71720	2526.96	-38.62
71740	2527.23	-39.27
71760	2527.51	-39.06
71780	2527.79	-39.22
71800	2528.07	-39.03
71820	2528.36	-38.23
71840	2528.64	-39.25
71860	2528.93	-38.2
71880	2529.22	-38.27
71900	2529.52	-38.73
71920	2529.81	-38.33
71940	2530.11	-38.44
71960	2530.41	-38.39
71980	2530.71	-38.1
72000	2531.02	-38.62
72020	2531.32	-37.74
72040	2531.63	-38.87
72060	2531.95	-37.94
72080	2532.26	-37.86
72100	2532.58	-37.76
72120	2532.9	-37.47
72140	2533.22	-37.13
72160	2533.54	-38.41
72180	2533.86	-38.3
72200	2534.19	-37.77
72220	2534.5	-37.26
72240	2534.79	-37.81
72260	2535.07	-38.12
72280	2535.32	-37.55
72300	2535.56	-38.47
72320	2535.76	-39.57
72340	2535.96	-41.29
72360	2536.17	-43.8
72380	2536.38	-43.21
72400	2536.58	-44.46
72420	2536.75	-43.95
72440	2536.91	-44.96
72460	2537.07	-44.11
72480	2537.22	-44.07
72500	2537.35	-43.04
72520	2537.48	-45.37
72540	2537.62	-43.47
72560	2537.75	-43.41
72580	2537.88	-43.92
72600	2538	-45.59
72620	2538.13	-45.56
72640	2538.26	-44.39
72660	2538.39	-44.42
72680	2538.51	-46
72700	2538.64	-44.91
72720	2538.76	-45.28
72740	2538.88	-43.85
72760	2539.01	-46.33
72780	2539.13	-44.78
72800	2539.25	-44.14
72820	2539.37	-44.17
72840	2539.5	-45.63
72860	2539.62	-44.26
72880	2539.74	-46
72900	2539.86	-44.7
72920	2539.98	-43.69
72940	2540.11	-44.07
72960	2540.23	-45
72980	2540.36	-44.9
73000	2540.48	-43.41
73020	2540.61	-45.43
73040	2540.73	-45.31
73060	2540.86	-45.12
73080	2540.98	-44.52
73100	2541.11	-45.59
73120	2541.23	-44.95
73140	2541.36	-44.28
73160	2541.49	-43.28
73180	2541.61	-43.48
73200	2541.73	-44.5
73220	2541.85	-44.81
73240	2541.97	-45.44
73260	2542.1	-44.85
73280	2542.22	-44.92
73300	2542.34	-44.78
73320	2542.46	-43.69
73340	2542.58	-44.43
73360	2542.7	-45.11
73380	2542.83	-46.28
73400	2542.95	-45.65
73420	2543.07	-46
73440	2543.19	-43.69
73460	2543.32	-44.27
73480	2543.44	-44.76
73500	2543.56	-45.06
73520	2543.69	-45.2
73540	2543.81	-45.24
73560	2543.93	-44.45
73580	2544.05	-45.05
73600	2544.17	-44.4
73620	2544.29	-43.2
73640	2544.41	-44.57
73660	2544.54	-44.97
73680	2544.67	-44.2
73700	2544.79	-44.44
73720	2544.92	-44.32
73740	2545.05	-44.89
73760	2545.18	-46.31
73780	2545.31	-44.8
73800	2545.44	-44.42
73820	2545.57	-44.04
73840	2545.7	-45.15
73860	2545.83	-43.95
73880	2545.95	-43.73
73900	2546.09	-43.74
73920	2546.23	-44.65
73940	2546.36	-44.43
73960	2546.5	-43.29
73980	2546.65	-44.34
74000	2546.8	-44.74
74020	2546.95	-45.42
74040	2547.1	-44.49
74060	2547.24	-43.68
74080	2547.38	-43.13
74100	2547.52	-42.63
74120	2547.67	-42.51
74140	2547.83	-42.72
74160	2548	-41.97
74180	2548.16	-42.91
74200	2548.36	-41.27
74220	2548.56	-41.53
74240	2548.76	-40.68
74260	2548.98	-40.36
74280	2549.19	-39.47
74300	2549.41	-39.53
74320	2549.63	-39.17
74340	2549.85	-40.56
74360	2550.08	-40.75
74380	2550.31	-40.83
74400	2550.53	-41.27
74420	2550.75	-41.76
74440	2550.96	-41.4
74460	2551.18	-40.44
74480	2551.4	-39.91
74500	2551.61	-40.77
74520	2551.83	-40.98
74540	2552.06	-40.56
74560	2552.29	-40.49
74580	2552.52	-40.36
74600	2552.76	-40.02
74620	2552.99	-39.7
74640	2553.23	-40.06
74660	2553.48	-39.87
74680	2553.72	-40.28
74700	2553.98	-39.72
74720	2554.23	-39.54
74740	2554.49	-39.75
74760	2554.74	-40.05
74780	2555.01	-38.73
74800	2555.27	-40.09
74820	2555.53	-38.71
74840	2555.79	-39.2
74860	2556.06	-39.67
74880	2556.33	-39.29
74900	2556.59	-39.08
74920	2556.86	-40.25
74940	2557.12	-39.7
74960	2557.39	-39.26
74980	2557.65	-39.93
75000	2557.91	-39.13
75020	2558.18	-39.5
75040	2558.45	-38.78
75060	2558.71	-39.45
75080	2558.98	-39.79
75100	2559.24	-39.53
75120	2559.51	-39.14
75140	2559.78	-39.04
75160	2560.05	-40
75180	2560.32	-39.01
75200	2560.59	-38.99
75220	2560.86	-39.65
75240	2561.13	-39.13
75260	2561.4	-38.64
75280	2561.67	-39.58
75300	2561.94	-39.11
75320	2562.21	-39.31
75340	2562.48	-39.56
75360	2562.75	-38.36
75380	2563.01	-39.99
75400	2563.28	-39.88
75420	2563.55	-38.98
75440	2563.82	-39.46
75460	2564.09	-39.09
75480	2564.36	-39.28
75500	2564.63	-39.19
75520	2564.91	-39.1
75540	2565.19	-38.72
75560	2565.48	-38.87
75580	2565.77	-39.93
75600	2566.06	-37.96
75620	2566.35	-37.75
75640	2566.64	-38.48
75660	2566.93	-39.08
75680	2567.23	-38.46
75700	2567.53	-38.83
75720	2567.82	-38.83
75740	2568.11	-38.45
75760	2568.4	-38.94
75780	2568.69	-38.61
75800	2568.98	-39.07
75820	2569.28	-38.65
75840	2569.58	-38.45
75860	2569.88	-37.7
75880	2570.19	-38.84
75900	2570.5	-37.71
75920	2570.8	-37.95
75940	2571.11	-38.55
75960	2571.42	-38.06
75980	2571.73	-38.56
76000	2572.04	-38.34
76020	2572.35	-38.44
76040	2572.66	-37.9
76060	2572.97	-38.26
76080	2573.29	-37.92
76100	2573.6	-37.98
76120	2573.92	-37.63
76140	2574.25	-38.59
76160	2574.57	-37.59
76180	2574.9	-37.79
76200	2575.23	-37.8
76220	2575.56	-37.27
76240	2575.89	-36.95
76260	2576.23	-37.62
76280	2576.57	-38.03
76300	2576.91	-37.22
76320	2577.26	-37.9
76340	2577.6	-37.13
76360	2577.94	-36.56
76380	2578.26	-36.55
76400	2578.57	-36.88
76420	2578.86	-37.99
76440	2579.13	-37.6
76460	2579.39	-41.68
76480	2579.63	-41.74
76500	2579.85	-41.81
76520	2580.06	-42.56
76540	2580.25	-43.73
76560	2580.43	-43.04
76580	2580.61	-42.53
76600	2580.78	-42.63
76620	2580.95	-42.12
76640	2581.12	-42.22
76660	2581.28	-42.33
76680	2581.45	-42.68
76700	2581.61	-42.24
76720	2581.77	-43.13
76740	2581.94	-41.71
76760	2582.1	-42.49
76780	2582.27	-42.73
76800	2582.43	-44.56
76820	2582.59	-42.68
76840	2582.75	-42.96
76860	2582.91	-44.03
76880	2583.07	-42.32
76900	2583.23	-41.36
76920	2583.39	-42.85
76940	2583.55	-42.83
76960	2583.71	-44.22
76980	2583.87	-42.58
77000	2584.03	-43.39
77020	2584.19	-41.98
77040	2584.35	-42.21
77060	2584.51	-42.36
77080	2584.68	-42.03
77100	2584.84	-42.65
77120	2585	-43.22
77140	2585.16	-42.37
77160	2585.33	-43.52
77180	2585.5	-43.33
77200	2585.66	-42.5
77220	2585.82	-43.3
77240	2585.98	-42.98
77260	2586.13	-42.06
77280	2586.29	-42.85
77300	2586.44	-41.71
77320	2586.6	-42.45
77340	2586.75	-42.56
77360	2586.91	-44.57
77380	2587.06	-43.24
77400	2587.21	-43.02
77420	2587.37	-43.2
77440	2587.53	-42.68
77460	2587.69	-44.61
77480	2587.84	-42.91
77500	2587.99	-42.67
77520	2588.15	-43.8
77540	2588.3	-42.44
77560	2588.46	-42.37
77580	2588.63	-42.37
77600	2588.79	-41.97
77620	2588.96	-43.12
77640	2589.13	-42.59
77660	2589.31	-42.92
77680	2589.48	-42.48
77700	2589.67	-42.35
77720	2589.85	-42.69
77740	2590.04	-41.7
77760	2590.25	-42
77780	2590.45	-41.07
77800	2590.67	-40.76
77820	2590.9	-41.25
77840	2591.13	-41.83
77860	2591.38	-39.79
77880	2591.64	-39.54
77900	2591.91	-39.02
77920	2592.18	-39.22
77940	2592.48	-38.83
77960	2592.77	-39.64
77980	2593.06	-38.59
78000	2593.35	-39.54
78020	2593.64	-38.94
78040	2593.92	-38.64
78060	2594.19	-39.69
78080	2594.45	-39.98
78100	2594.7	-40.26
78120	2594.94	-40.4
78140	2595.17	-40.26
78160	2595.4	-41.07
78180	2595.63	-40.84
78200	2595.85	-40.48
78220	2596.07	-42.04
78240	2596.29	-40.66
78260	2596.5	-41.57
78280	2596.72	-40.62
78300	2596.94	-40.7
78320	2597.15	-41
78340	2597.38	-40.45
78360	2597.6	-41.49
78380	2597.83	-41.15
78400	2598.06	-40.34
78420	2598.29	-40.94
78440	2598.53	-39.64
78460	2598.76	-40.34
78480	2599	-39.72
78500	2599.23	-39.67
78520	2599.47	-40.85
78540	2599.72	-40.77
78560	2599.96	-39.95
78580	2600.19	-40.7
78600	2600.43	-40.32
78620	2600.66	-40.1
78640	2600.9	-40.27
78660	2601.14	-40.73
78680	2601.38	-40.15
78700	2601.63	-40.43
78720	2601.88	-40.63
78740	2602.13	-40.29
78760	2602.39	-39.05
78780	2602.65	-39.33
78800	2602.92	-39.11
78820	2603.2	-39.53
78840	2603.48	-39.23
78860	2603.76	-39.47
78880	2604.04	-38.79
78900	2604.32	-38.49
78920	2604.61	-39
78940	2604.9	-39.63
78960	2605.19	-39.37
78980	2605.48	-38.65
79000	2605.76	-38.91
79020	2606.04	-38.46
79040	2606.32	-39.1
79060	2606.61	-39.09
79080	2606.89	-39.67
79100	2607.18	-39.51
79120	2607.46	-39.23
79140	2607.75	-39.47
79160	2608.04	-38.42
79180	2608.32	-38.51
79200	2608.6	-38.66
79220	2608.87	-37.88
79240	2609.14	-38.99
79260	2609.39	-40.24
79280	2609.64	-40.68
79300	2609.87	-41.03
79320	2610.11	-41.02
79340	2610.34	-39.62
79360	2610.56	-41.51
79380	2610.79	-40.02
79400	2611.01	-39.99
79420	2611.24	-40.67
79440	2611.47	-39.94
79460	2611.7	-39.94
79480	2611.92	-39.43
79500	2612.16	-39.88
79520	2612.39	-40.29
79540	2612.62	-40.07
79560	2612.86	-39.97
79580	2613.1	-40.78
79600	2613.33	-40.34
79620	2613.56	-39.58
79640	2613.8	-38.98
79660	2614.03	-39.85
79680	2614.26	-40.75
79700	2614.5	-41.2
79720	2614.73	-38.85
79740	2614.97	-40.3
79760	2615.21	-40.33
79780	2615.44	-40.03
79800	2615.68	-39.86
79820	2615.92	-39.35
79840	2616.17	-40.1
79860	2616.41	-40.18
79880	2616.66	-38.99
79900	2616.91	-39.09
79920	2617.16	-39.76
79940	2617.41	-39.14
79960	2617.66	-39.84
79980	2617.92	-39.92
80000	2618.17	-39.71

## Sheet: GISP2
% GICC05_age(b2k)	Depth(m)	d18O(permil)
70031.2	2565.4	-42.27
70073.9	2565.6	-41.28
70116.8	2565.8	-41.3
70159.3	2566	-41.87
70200.3	2566.2	-41.02
70241.1	2566.4	-41.79
70280.6	2566.6	-41.91
70318.6	2566.8	-41.55
70355.2	2567	-41.28
70391	2567.2	-39.93
70426.5	2567.4	-41.26
70461.9	2567.6	-40.6
70495.2	2567.8	-39.97
70527.2	2568	-40.39
70559.3	2568.2	-39.95
70590.6	2568.4	-40.53
70621.8	2568.6	-40.09
70652	2568.8	-40.5
70683.3	2569	-41.26
70714.7	2569.2	-39.65
70744.5	2569.4	-39.73
70773.4	2569.6	-40.32
70801.4	2569.8	-39.63
70829.4	2570	-39.85
70857.4	2570.2	-38.91
70884	2570.4	-36.14
70909.8	2570.6	-39.59
70934.9	2570.8	-37.52
70959.1	2571	-38.62
70983.2	2571.2	-37.05
71006.6	2571.4	-37.71
71030.8	2571.6	-38.93
71055	2571.8	-37.94
71079.2	2572	-37.89
71102.4	2572.2	-38.28
71125.5	2572.4	-38.58
71148.7	2572.6	-37.98
71171.8	2572.8	-37.96
71195	2573	-37.99
71218.1	2573.2	-39.09
71239.6	2573.4	-38
71261.7	2573.6	-37.7
71284.8	2573.8	-38.01
71308.1	2574	-37.89
71331.7	2574.2	-38.36
71354.7	2574.4	-36.91
71377.8	2574.6	-38.77
71424.7	2575	-38.99
71447.8	2575.2	-37.57
71470.8	2575.4	-37.99
71493.9	2575.6	-37.69
71516.3	2575.8	-37.27
71539.2	2576	-37.53
71561.5	2576.2	-38.01
71587.1	2576.43	-37.46
71604.2	2576.6	-38.43
71624.4	2576.8	-39
71644.4	2577	-37.63
71664	2577.2	-38.36
71684	2577.4	-37.03
71703.5	2577.6	-37.25
71722.9	2577.8	-37.49
71742.2	2578	-38.4
71761	2578.2	-37.98
71779.7	2578.4	-37.2
71798.7	2578.6	-37.36
71818.2	2578.8	-37.58
71838.3	2579	-36.69
71857.9	2579.2	-36.97
71877	2579.4	-36.86
71895.1	2579.6	-37.8
71913.6	2579.8	-36.84
71931.8	2580	-37.64
71949.7	2580.2	-37.28
71967.7	2580.4	-37.25
71985.5	2580.6	-37.23
72003	2580.8	-37.72
72021	2581	-37.42
72038.4	2581.2	-36.9
72055.3	2581.4	-36.75
72072.6	2581.6	-36.13
72089.6	2581.8	-36.03
72106.5	2582	-37.04
72123.4	2582.2	-36.2
72140.2	2582.4	-37.57
72157.1	2582.6	-36.47
72173.9	2582.8	-35.79
72190.5	2583	-34.98
72207.3	2583.2	-36.24
72228.5	2583.4	-37.07
72251.4	2583.6	-37.26
72276.6	2583.8	-35.46
72304.4	2584	-36.59
72337.1	2584.2	-37.81
72368.4	2584.4	-41.79
72400.6	2584.6	-42.16
72440.3	2584.8	-43.42
72483	2585	-41.52
72532.4	2585.2	-43.12
72582.3	2585.4	-42.18
72633.9	2585.6	-43.63
72685.8	2585.8	-43.1
72739.1	2586	-43.64
72792	2586.2	-43.75
72844.8	2586.4	-41.85
72899.3	2586.6	-41.94
72952.2	2586.8	-42.45
73004.6	2587	-41.9
73056.5	2587.2	-43.3
73109.1	2587.4	-42.47
73160.2	2587.6	-41.38
73214.7	2587.8	-42.19
73267.6	2588	-42.4
73322.1	2588.2	-42.89
73375.3	2588.4	-43.69
73429.5	2588.6	-43.8
73482.3	2588.8	-42.89
73535.1	2589	-43.36
73589.7	2589.2	-43.13
73643.9	2589.4	-42.62
73695.4	2589.6	-43.19
73746	2589.8	-43.52
73796.3	2590	-44.18
73846.7	2590.2	-42.61
73897.2	2590.4	-42.76
73945.4	2590.6	-43.89
73989.9	2590.8	-42.11
74033.6	2591	-42.85
74076.2	2591.2	-41.37
74114.8	2591.4	-40.58
74149.4	2591.6	-41.02
74184.7	2591.8	-40.5
74214.9	2592	-39.71
74244.6	2592.2	-39
74272.6	2592.4	-38.26
74300.3	2592.6	-39.43
74330.5	2592.82	-38.97
74354.6	2593	-40.34
74383.2	2593.2	-39.28
74413	2593.4	-39.67
74443.7	2593.6	-39.03
74473.5	2593.8	-39.47
74503.2	2594	-38.95
74536.3	2594.24	-38.89
74557.9	2594.4	-39.34
74584.7	2594.6	-38.9
74611	2594.8	-39.37
74637.3	2595	-39.45
74662.5	2595.2	-39.85
74687.9	2595.4	-38.67
74711.9	2595.6	-38.88
74734.7	2595.8	-39.06
74757.9	2596	-38.67
74779.7	2596.2	-39.06
74802.1	2596.4	-39.05
74824.6	2596.6	-38.6
74846.8	2596.8	-38.6
74868.5	2597	-38.35
74890.5	2597.2	-38.45
74912.5	2597.4	-38.36
74934.7	2597.6	-37.73
74956.5	2597.8	-39.01
74978.9	2598	-38.15
75001.3	2598.2	-38.91
75023	2598.4	-37.7
75045.5	2598.6	-37.58
75069	2598.8	-38.43
75092.4	2599	-38.96
75115.7	2599.2	-38.01
75138.7	2599.4	-39.01
75161.6	2599.6	-38.82
75184.6	2599.8	-37.61
75207.6	2600	-38.31
75230.6	2600.2	-37.57
75253.5	2600.4	-38.02
75276.5	2600.6	-38.16
75299.5	2600.8	-38.46
75322.5	2601	-38.34
75345.5	2601.2	-37.73
75368.8	2601.4	-37.88
75392.2	2601.6	-38.33
75415.1	2601.8	-38.03
75438.1	2602	-38.68
75461.1	2602.2	-37
75484.1	2602.4	-38.08
75506.8	2602.6	-38.49
75528.1	2602.8	-37.97
75548.6	2603.01	-37.98
75567.3	2603.2	-36.97
75588.1	2603.4	-37.26
75609	2603.6	-37.57
75629.8	2603.8	-38.18
75650.6	2604	-36.82
75671.1	2604.2	-37.39
75691.2	2604.4	-36.91
75711.8	2604.6	-37.3
75732.6	2604.8	-36.83
75753.4	2605	-37.08
75774.3	2605.2	-36.83
75795.1	2605.4	-37.07
75815.4	2605.6	-37.88
75837.6	2605.82	-36.86
75855.7	2606	-37.14
75875.2	2606.2	-37.59
75893.9	2606.4	-37.15
75913.1	2606.6	-37.63
75932.1	2606.8	-37.34
75950.8	2607	-37.27
75969.5	2607.2	-37.75
75987.1	2607.4	-37.42
76006.3	2607.6	-36.22
76026	2607.8	-37.64
76044.3	2607.99	-36.99
76063.3	2608.2	-36.75
76081.1	2608.4	-36.98
76099.4	2608.6	-36.37
76117.7	2608.8	-36.29
76135.5	2609	-36.65
76153.6	2609.2	-36.89
76171.5	2609.4	-36.87
76189.2	2609.6	-37.33
76207	2609.8	-36.53
76224.7	2610	-37.03
76242.3	2610.2	-36.55
76259.5	2610.4	-37.03
76276.7	2610.6	-36.53
76293.9	2610.8	-36.6
76310.8	2611	-36.76
76327.7	2611.2	-36.56
76344.9	2611.4	-36.2
76364.3	2611.6	-36.62
76388.1	2611.82	-36.94
76408.7	2612	-37.03
76433.3	2612.2	-37.59
76459.4	2612.4	-39.77
76488.7	2612.6	-40.83
76521	2612.8	-41.95
76558.1	2613	-42.36
76597.2	2613.2	-41.43
76637.6	2613.4	-40.89
76679.2	2613.6	-42.35
76722	2613.8	-41.65
76763.6	2614	-41.13
76805.5	2614.2	-41.05
76848.4	2614.4	-41.31
76893.5	2614.61	-41.52
76934.3	2614.8	-42.47
76977.3	2615	-43.02
77020.2	2615.2	-41.94
77063	2615.4	-40.68
77104.8	2615.6	-41.77
77147.3	2615.8	-42.24
77188.2	2616	-42.4
77231.1	2616.2	-41.11
77275.3	2616.4	-41.47
77319.5	2616.6	-41.54
77364	2616.8	-42.23
77409.2	2617	-41.72
77452.1	2617.2	-42.36
77497.4	2617.4	-42.02
77541.7	2617.6	-42.74
77583.4	2617.8	-41.92
77624.8	2618	-41.64
77664	2618.2	-40.62
77702	2618.4	-40.86
77739.1	2618.6	-39.69
77772.5	2618.8	-40.82
77804.2	2619	-38.01
77834.1	2619.2	-39.53
77862	2619.4	-39.24
77888.1	2619.6	-39.1
77913.5	2619.8	-38.34
77937.1	2620	-38.76
77960.7	2620.2	-38.5
77984.3	2620.4	-38.52
78008	2620.6	-38.63
78032.1	2620.8	-38.61
78056.1	2621	-38.76
78079.9	2621.2	-38.46
78105.1	2621.4	-38.63
78131.6	2621.6	-39.7
78158.8	2621.8	-39.74
78186.2	2622	-40.22
78214.6	2622.2	-40.04
78243.2	2622.4	-40.46
78272.3	2622.6	-38.84
78300.8	2622.8	-39.78
78329.6	2623	-40.1
78357.5	2623.2	-39.49
78384.8	2623.4	-39.41
78412	2623.6	-39.11
78438.6	2623.8	-39.31
78465.6	2624	-39.01
78492.3	2624.2	-38.96
78518.9	2624.4	-39.28
78544.3	2624.6	-39.36
78570.9	2624.8	-39.35
78597.5	2625	-39.09
78624.6	2625.2	-38.72
78650.8	2625.4	-39.14
78677	2625.6	-38.23
78702.3	2625.8	-39.49
78727.4	2626	-38.85
78752.1	2626.2	-38.11
78776.3	2626.4	-37.47
78799.8	2626.6	-38.43
78822.5	2626.8	-38.07
78846.2	2627	-38.08
78869.8	2627.2	-38.3
78893.5	2627.4	-38.58
78916.6	2627.6	-38.38
78939.5	2627.8	-37.64
78962.4	2628	-38.6
78985.5	2628.2	-37.88
79009.2	2628.4	-38.21
79032.9	2628.6	-38.44
79056	2628.8	-38.71
79079.5	2629	-38.23
79102.5	2629.2	-37.99
79126	2629.4	-38.82
79148.9	2629.6	-37.99
79172.2	2629.8	-37.34
79195.8	2630	-37.14
79219.9	2630.2	-37.25
79244.5	2630.4	-39.01
79270.7	2630.6	-39.28
79298.4	2630.8	-38.2
79326	2631	-39.74
79355.2	2631.2	-38.31
79384	2631.4	-39.6
79413.2	2631.6	-39.12
79441.7	2631.8	-38.64
79470.6	2632	-39.01
79498.7	2632.2	-38.4
79528.7	2632.4	-38.42
79558.3	2632.6	-39.2
79587.8	2632.8	-39.67
79618.2	2633	-38.37
79647.8	2633.2	-39.48
79678.2	2633.4	-38.57
79707.8	2633.6	-38.26
79737.5	2633.8	-38.87
79766.9	2634	-39.06
79796.7	2634.2	-39.84
79825.6	2634.4	-38.73
79854.2	2634.6	-37.77
79882.4	2634.8	-38.44
79910.4	2635	-39.01
79938.4	2635.2	-38.45
79966.2	2635.4	-38.26
79993.4	2635.6	-38.63
80018.3	2635.8	-38.01

## Sheet: EDML
% GICC05_age(b2k)	Depth(m)	d18O(permil)
70000	1808.75	-49.0186
70036	1809.25	-50.1674
70072	1809.75	-49.3788
70107	1810.25	-48.3813
70140.9	1810.75	-49.56
70174.8	1811.25	-49.1102
70211	1811.75	-50.0265
70249.4	1812.25	-49.6087
70287.8	1812.75	-50.5113
70326.8	1813.25	-49.8971
70366.3	1813.75	-50.0976
70405.9	1814.25	-50.9108
70444.4	1814.75	-48.1642
70482	1815.25	-50.9843
70519.6	1815.75	-50.6304
70558.3	1816.25	-50.3662
70597.7	1816.74	-50.1506
70637.5	1817.24	-50.5204
70678.5	1817.75	-50.9139
70719.7	1818.25	-50.1831
70760.9	1818.75	-50.7593
70801.2	1819.25	-50.8072
70840.6	1819.75	-50.0161
70880	1820.25	-49.8302
70918.1	1820.75	-49.3412
70955.1	1821.25	-49.7953
70992	1821.75	-49.86
71029.7	1822.25	-49.5565
71068	1822.75	-50.3584
71106.3	1823.25	-49.9693
71143.4	1823.75	-49.5636
71179.2	1824.25	-49.7
71215	1824.75	-48.8867
71251.1	1825.25	-49.747
71287.3	1825.75	-49.6884
71323.5	1826.25	-48.9182
71359.7	1826.75	-49.2488
71395.9	1827.25	-50.1209
71432.1	1827.75	-48.8989
71468.4	1828.25	-49.6461
71504.7	1828.75	-49.8996
71541.1	1829.25	-48.7917
71577	1829.75	-49.8904
71612.6	1830.25	-48.8539
71648.1	1830.75	-48.9301
71683	1831.25	-49.0142
71717.4	1831.75	-48.5258
71751.7	1832.25	-49.2177
71786	1832.75	-49.268
71820.4	1833.25	-48.5967
71854.8	1833.75	-48.8861
71888.9	1834.25	-48.4781
71922.7	1834.75	-48.4768
71956.5	1835.25	-49.3451
71990.8	1835.75	-48.8096
72025.5	1836.25	-48.2922
72060.2	1836.75	-49.7911
72093	1837.25	-47.8199
72123.9	1837.75	-47.3912
72154.7	1838.25	-48.4758
72186.3	1838.75	-48.1501
72218.5	1839.25	-47.719
72250.8	1839.75	-48.8043
72282.5	1840.25	-48.4089
72313.7	1840.75	-47.7098
72345	1841.25	-47.4964
72376.3	1841.75	-48.5257
72407.7	1842.25	-47.543
72439.2	1842.75	-47.5355
72471.5	1843.25	-48.3912
72504.8	1843.75	-48.1877
72538.1	1844.25	-48.226
72570.9	1844.75	-47.728
72603.1	1845.25	-47.9079
72635.4	1845.75	-48.0878
72667.2	1846.25	-47.8575
72698.7	1846.75	-47.9362
72730.1	1847.25	-46.9585
72761.7	1847.75	-46.9631
72793.5	1848.25	-47.8739
72825.3	1848.75	-47.8418
72857.4	1849.25	-47.4572
72889.9	1849.75	-47.6982
72922.4	1850.25	-47.7357
72954.2	1850.75	-46.9492
72985.5	1851.25	-47.2906
73016.7	1851.75	-47.199
73049.1	1852.25	-47.4876
73082.6	1852.75	-47.5466
73116.1	1853.25	-47.7634
73149.5	1853.75	-47.5256
73182.6	1854.25	-47.2287
73215.8	1854.75	-47.3205
73249.1	1855.25	-47.2654
73282.4	1855.75	-47.5525
73315.8	1856.25	-46.9564
73349.9	1856.75	-47.0236
73384.8	1857.25	-47.6102
73419.6	1857.75	-47.9134
73453.9	1858.25	-46.8182
73487.4	1858.75	-47.399
73520.9	1859.25	-46.8712
73555.3	1859.75	-47.3284
73590.6	1860.25	-47.853
73625.9	1860.75	-46.8556
73660.4	1861.25	-47.0131
73694.2	1861.75	-46.7411
73727.9	1862.25	-46.7287
73764.1	1862.75	-48.2017
73802.8	1863.25	-47.6601
73841.4	1863.75	-47.8156
73879.5	1864.25	-47.4048
73917.2	1864.75	-47.4479
73954.9	1865.25	-47.8382
73996	1865.75	-48.0938
74040.5	1866.25	-49.1063
74085	1866.75	-49.5425
74129.2	1867.25	-49.1132
74173.2	1867.75	-48.1259
74217.2	1868.25	-48.9082
74260.5	1868.75	-48.5117
74303.2	1869.25	-48.5162
74345.9	1869.75	-48.1063
74388.4	1870.25	-48.796
74430.7	1870.75	-48.2236
74472.9	1871.25	-47.7396
74515.6	1871.75	-48.4378
74558.8	1872.25	-47.8426
74601.9	1872.75	-48.9548
74645.4	1873.25	-48.7102
74689.2	1873.75	-48.6562
74733	1874.25	-48.2382
74775.1	1874.75	-47.7478
74815.5	1875.25	-48.2942
74855.9	1875.75	-47.4534
74896.3	1876.25	-47.9062
74936.8	1876.75	-47.7307
74977.3	1877.25	-47.9333
75018.5	1877.75	-48.6587
75060.5	1878.25	-47.7087
75102.5	1878.75	-48.2765
75143.3	1879.25	-47.3729
75182.8	1879.75	-47.6634
75222.3	1880.25	-48.113
75262.2	1880.75	-47.6374
75302.6	1881.25	-47.6111
75342.9	1881.75	-48.5483
75383.4	1882.25	-48.4894
75424	1882.75	-47.6013
75464.6	1883.25	-48.0163
75503.7	1883.75	-47.2182
75541.2	1884.25	-47.8
75578.8	1884.75	-47.1336
75618.1	1885.25	-47.9877
75659.1	1885.75	-48.0687
75700.1	1886.25	-48.5124
75740.7	1886.75	-48.5768
75780.8	1887.25	-47.9299
75820.9	1887.75	-47.6201
75860	1888.25	-47.9037
75898.2	1888.75	-47.7324
75936.3	1889.25	-47.221
75974.2	1889.75	-47.4054
76011.9	1890.25	-47.1422
76049.6	1890.75	-48.1156
76086.4	1891.25	-47.1284
76122.3	1891.75	-47.3323
76158.2	1892.25	-46.9417
76194.7	1892.75	-47.7395
76231.9	1893.25	-46.9831
76269.1	1893.75	-47.7233
76305.9	1894.25	-48.0894
76342.5	1894.75	-47.3248
76379.1	1895.25	-46.6946
76415.5	1895.75	-47.581
76451.6	1896.25	-47.1384
76487.8	1896.75	-47.0971
76523.4	1897.25	-46.944
76558.6	1897.75	-47.0017
76593.7	1898.25	-47.1232
76629.2	1898.75	-47.1315
76665.2	1899.25	-46.6497
76701.2	1899.75	-48.0461
76737.2	1900.25	-47.2238
76773.1	1900.75	-46.8865
76808.9	1901.25	-47.6492
76846	1901.75	-48.0374
76884.3	1902.25	-47.6935
76922.6	1902.75	-47.7901
76960.5	1903.25	-47.9662
76998.1	1903.75	-47.4486
77035.6	1904.25	-47.6387
77071.8	1904.75	-46.8524
77106.5	1905.25	-46.9684
77141.3	1905.75	-47.2277
77177.2	1906.25	-48.0016
77214.1	1906.75	-46.9212
77251.1	1907.25	-47.8247
77288.2	1907.75	-47.9576
77325.5	1908.25	-47.6812
77362.8	1908.75	-47.3265
77400	1909.25	-48.0506
77436.9	1909.75	-47.6999
77473.9	1910.25	-47.0329
77510.6	1910.75	-47.8775
77547	1911.25	-47.8536
77583.5	1911.75	-46.713
77620	1912.25	-46.7924
77656.6	1912.75	-47.7972
77693.2	1913.25	-47.9967
77729.8	1913.75	-47.3236
77766.3	1914.25	-47.2192
77802.9	1914.75	-48.0114
77840.9	1915.25	-47.5605
77880.3	1915.75	-48.6176
77919.8	1916.25	-48.4087
77959.1	1916.75	-47.8357
77998.3	1917.25	-48.3472
78037.6	1917.75	-48.28
78077.4	1918.25	-48.4506
78118	1918.75	-48.6211
78158.5	1919.25	-48.2283
78198.7	1919.75	-47.9484
78238.6	1920.25	-49.0062
78278.5	1920.75	-47.964
78318	1921.25	-47.7914
78357.2	1921.75	-47.6918
78396.3	1922.25	-48.9591
78435	1922.75	-48.8277
78473.1	1923.25	-47.8622
78511.2	1923.75	-47.0116
78550.6	1924.25	-48.342
78591.5	1924.75	-48.6222
78632.4	1925.25	-48.4675
78672.7	1925.75	-47.8726
78712.3	1926.25	-48.1934
78752	1926.75	-48.5346
78790.6	1927.25	-47.9794
78828.1	1927.75	-46.9888
78865.7	1928.25	-48.0925
78904.2	1928.75	-47.6115
78943.8	1929.25	-48.5748
78983.3	1929.75	-48.1423
79022.7	1930.25	-48.6274
79061.7	1930.75	-47.6478
79100.8	1931.25	-47.6136
79138.3	1931.75	-48.0067
79174.2	1932.25	-46.83
79210.1	1932.75	-46.6432
79247.2	1933.25	-47.7474
79285.5	1933.75	-47.6304
79323.8	1934.25	-47.6349
79362.7	1934.75	-48.844
79402	1935.25	-47.3226
79441.3	1935.75	-47.4404
79479.9	1936.25	-48.2858
79517.7	1936.75	-47.2213
79555.5	1937.25	-46.7874
79593.8	1937.75	-47.0176
79632.6	1938.25	-47.5954
79671.3	1938.75	-48.1336
79711.3	1939.25	-47.8151
79752.5	1939.75	-48.0673
79793.7	1940.25	-48.1925
79833.2	1940.75	-47.1845
79871	1941.25	-47.3373
79908.8	1941.75	-47.0501
79948.1	1942.25	-47.6584
79988.8	1942.75	-47.9482
80029.6	1943.25	-47.7149

## Sheet: DF1
% GICC05_age(b2k)	Depth(m)	d18O(permil)
70052.6	1129	-60.42
70106.5	1129.44	-59.52
70168.4	1129.97	-59.97
70228.3	1130.49	-59.38
70284	1130.99	-58.04
70341.5	1131.51	-59.93
70396.2	1132	-59.43
70453.4	1132.5	-59.84
70511.4	1133	-58.58
70569.1	1133.5	-59.79
70627.7	1134.01	-59.54
70684.2	1134.5	-59.64
70741.8	1135	-59.13
70799.5	1135.5	-59.74
70857	1136	-59.37
70912	1136.47	-58.84
70971.2	1137	-59.45
71027.6	1137.5	-59.62
71083.3	1138	-58.73
71138	1138.5	-58.47
71192.2	1139	-58.61
71246.6	1139.5	-59.9
71302.2	1140	-59.14
71359.8	1140.5	-59.56
71417.4	1141	-59.08
71472.8	1141.5	-58.45
71526.3	1142	-58.76
71579.1	1142.5	-58.69
71632.1	1143	-58.53
71686.1	1143.5	-59.41
71741	1144	-58.85
71796.6	1144.5	-59.11
71851	1145	-58.46
71903.2	1145.5	-57.57
71953.7	1146	-58.39
72003.3	1146.5	-57.1
72052.1	1147	-58.34
72100.1	1147.5	-57.21
72147.4	1148	-57.5
72194.6	1148.5	-57.13
72241.7	1149	-58.2
72288.8	1149.5	-58.02
72337	1150	-57.33
72387	1150.5	-59.12
72438.6	1151	-58.23
72491.5	1151.5	-58.11
72544.4	1152	-58.54
72596.3	1152.5	-58.37
72647.1	1153	-57.84
72697.2	1153.5	-58.17
72747.6	1154	-57.87
72798.7	1154.5	-58.85
72850.3	1155	-58.48
72901.9	1155.5	-58.21
72952.9	1156	-57.33
73002.9	1156.5	-56.93
73052.4	1157	-59.32
73102.4	1157.5	-57.87
73153	1158	-58.08
73204.4	1158.5	-58.88
73256.7	1159	-58.32
73309.4	1159.5	-58.42
73362.4	1160	-58.6
73415.4	1160.5	-58.2
73468.2	1161	-58.87
73522.5	1161.52	-57.66
73576	1162.04	-58.4
73627.1	1162.54	-58.27
73678.8	1163.04	-58.53
73727.2	1163.5	-58.76
73780.4	1164	-58.26
73833.6	1164.5	-59.34
73882.7	1164.95	-58.56
73947.9	1165.52	-59.73
74004.5	1166	-59.71
74063.9	1166.5	-59.25
74122.9	1167	-59.27
74180.8	1167.5	-58.91
74238.1	1168	-59.67
74295.2	1168.5	-58.95
74351.2	1169	-58.47
74405.6	1169.5	-59.01
74459.1	1170	-58.23
74512.8	1170.5	-57.31
74565.9	1171	-59.16
74617.3	1171.5	-58.14
74667.5	1172	-57.74
74717.7	1172.5	-57.5
74768.1	1173	-58.3
74819.1	1173.5	-58.62
74870.7	1174	-58.23
74923.1	1174.5	-57.88
74975.5	1175	-58.43
75027.2	1175.5	-58.01
75079.2	1176	-58.59
75132	1176.5	-58.41
75185	1177	-58.7
75237	1177.5	-57.17
75283.6	1177.96	-57.78
75333.7	1178.47	-57.89
75383	1178.98	-57.43
75433.1	1179.49	-57.62
75483.5	1180	-57.8
75532.5	1180.5	-57.08
75580.9	1181	-57.79
75628.8	1181.5	-56.6
75677.2	1182	-58.57
75726.5	1182.49	-58.2
75778.8	1183	-58.26
75830.4	1183.5	-57.53
75881.5	1184	-58.52
75932	1184.5	-57.29
75982	1185	-57.75
76031.8	1185.5	-57.7
76081.6	1186	-58.32
76130.5	1186.49	-56.67
76180	1187	-57.69
76226.1	1187.5	-57.15
76268.4	1187.97	-56.77
76315.5	1188.49	-57.14
76362.3	1189	-56.32
76408.1	1189.5	-57.32
76454.4	1190	-57.01
76501.5	1190.5	-57.41
76549.7	1191	-57.67
76599.3	1191.5	-57.79
76649.3	1192	-57.67
76698.6	1192.5	-57.77
76747.7	1193	-57.08
76797.4	1193.5	-58.39
76848.3	1194	-58.17
76900.7	1194.5	-58.28
76953	1195	-57.75
77003.6	1195.5	-57.87
77053.6	1196	-57.19
77104.4	1196.5	-58.54
77156.2	1197	-58.49
77209.1	1197.5	-57.57
77262	1198	-58.44
77314.4	1198.5	-57.94
77366.7	1199	-58.69
77419.8	1199.5	-57.23
77472.5	1200	-58.47
77523.8	1200.5	-57.97
77575.2	1201	-58.14
77628.3	1201.5	-58.54
77683.1	1202	-59.15
77739.1	1202.5	-58.69
77795.1	1203	-58.57
77848.2	1203.48	-58.92
77906.2	1204	-58.56
77963.3	1204.5	-58.87
78020.3	1205	-58.94
78075.4	1205.5	-57.72
78128.2	1206	-58.04
78179.1	1206.5	-58.34
78229.8	1207	-57.27
78281.4	1207.5	-57.99
78333.5	1208	-58.26
78384.8	1208.5	-57.85
78435.1	1209	-56.98
78484.8	1209.5	-58.47
78535.7	1210	-57.69
78589.5	1210.5	-58.49
78644.6	1211	-58.68
78698.9	1211.5	-58.25
78752.5	1212	-57.82
78805.4	1212.5	-58.05
78858.3	1213	-58.51
78911.7	1213.5	-57.93
78965.1	1214	-58.25
79017.8	1214.5	-58.05
79069.8	1215	-57.83
79121.3	1215.5	-58.09
79172.5	1216	-57.45
79223.6	1216.5	-58.18
79275.1	1217	-57.53
79327.1	1217.5	-58.08
79378.8	1218	-57.81
79429.7	1218.5	-57.41
79480.4	1219	-57.67
79531.6	1219.5	-58.29
79583.1	1220	-57.97
79634.8	1220.5	-57.94
79687.8	1221	-57.8
79743	1221.5	-59.05
79798.8	1222	-58.86
79853.5	1222.5	-58.04
79906.7	1223	-57.33
79958.7	1223.5	-57.8
80010.4	1224	-58.16

## Sheet: EDC
% GICC05_age(b2k)	dD(permil)
70062.4	-439.558
70129.5	-440.989
70196.6	-442.337
70267	-443.212
70337.5	-443.523
70408	-443.283
70478.4	-443.665
70548.9	-442.812
70619.4	-442.871
70688.5	-439.959
70757.6	-439.664
70826.7	-439.154
70891	-438.373
70955.3	-435.985
71019.7	-436.384
71080.6	-434.908
71141.5	-433.876
71202.5	-434.609
71264.2	-435.327
71326	-435.462
71387.8	-435.55
71448.5	-435.293
71509.3	-432.487
71570	-431.491
71627.9	-431.345
71685.8	-430.073
71743.6	-428.832
71800.4	-428.816
71857.2	-428.508
71913.9	-426.258
71967.1	-425.986
72020.3	-424.671
72073.5	-423.491
72124.9	-421.855
72176.2	-421.61
72227.6	-420.986
72277.4	-421.436
72327.2	-421.179
72377	-424.426
72431.4	-426.591
72485.7	-426.252
72540	-427.603
72595.5	-428.837
72650.9	-427.001
72706.4	-425.477
72760.3	-426.455
72814.3	-426.415
72868.2	-427.368
72924.7	-428.076
72981.2	-429.147
73037.6	-428.929
73092.7	-428.542
73147.8	-428.116
73203	-427.965
73259	-428.125
73315.1	-429.39
73371.1	-429.271
73427.6	-429.603
73484.1	-430.392
73540.6	-430.321
73598.6	-431.756
73656.7	-432.313
73714.7	-432.92
73774.5	-432.958
73834.4	-434.562
73894.3	-435.599
73957.6	-436.644
74021	-437.353
74084.4	-438.615
74148.3	-438.578
74212.2	-437.089
74276.2	-436.754
74338.2	-436.156
74400.3	-435.086
74462.4	-433.867
74522.5	-433.889
74582.6	-432.678
74642.7	-431.784
74700.7	-430.089
74758.7	-429.235
74816.7	-429.108
74874	-428.604
74931.4	-428.867
74988.7	-429.421
75045.6	-430.581
75102.6	-428.155
75159.5	-429.076
75216.5	-428.042
75273.5	-427.782
75330.5	-426.234
75386.2	-427.576
75441.9	-426.542
75497.6	-426.242
75552.6	-423.802
75607.7	-422.94
75662.8	-421.611
75713.7	-421.022
75764.5	-419.632
75815.4	-421.443
75867.2	-420.381
75918.9	-419.832
75970.7	-420.211
76021.9	-420.35
76073.1	-419.688
76124.2	-420.26
76175.1	-419.548
76226.1	-416.7
76277	-416.357
76324.4	-415.516
76371.8	-414.983
76419.1	-416.016
76468.7	-417.999
76518.3	-418.768
76567.8	-420.304
76621.1	-421.296
76674.3	-422.115
76727.6	-422.18
76782.5	-424.01
76837.3	-424.333
76892.2	-425.152
76949.5	-425.015
77006.7	-426.058
77064	-425.642
77120.5	-425.681
77176.9	-426.433
77233.4	-427.425
77292.5	-427.665
77351.5	-428.408
77410.6	-429.075
77471	-430.067
77531.4	-430.223
77591.8	-431.754
77656.2	-432.947
77720.6	-433.846
77784.9	-432.659
77850.1	-432.901
77915.2	-431.267
77980.3	-429.263
78040.8	-429.6
78101.3	-430.217
78161.8	-429.984
78224.8	-430.011
78287.8	-429.988
78350.8	-430.701
78412.5	-429.95
78474.2	-430.238
78535.9	-430.448
78596	-430.543
78656	-429.468
78716.1	-430.307
78778.1	-429.936
78840	-430.45
78902	-430.322
78962.5	-428.991
79023	-427.752
79083.5	-427.135
79141.3	-427.09
79199	-425.818
79256.8	-426.208
79313.9	-425.966
79371	-425.424
79428.1	-425.405
79484.5	-428.302
79541	-428.404
79597.5	-429.332
79657.5	-431.01
79717.6	-431.52
79777.7	-430.672
79838.9	-430.622
79900.1	-430.85
79961.3	-430.308
80020.1	-429.848
